1 **Multiplex spatial systems analysis of local nanodose drug responses predicts effective**  
2 **treatment combinations of immunotherapies and targeted agents in mammary carcinoma**

3  
4 Zuzana Tatarova,<sup>1,2</sup> Dylan C. Blumberg,<sup>1</sup> James E. Korkola,<sup>1,2</sup> Laura M. Heiser,<sup>1,2</sup> John L.  
5 Muschler,<sup>1,2</sup> Pepper J. Schedin,<sup>2,3</sup> Sebastian W. Ahn,<sup>4</sup> Gordon B. Mills,<sup>5</sup> Lisa M. Coussens,<sup>2,3</sup>  
6 Oliver Jonas,<sup>4,\*</sup> Joe W. Gray<sup>1,2,6,\*</sup>

7 <sup>1</sup>Department of Biomedical Engineering, OHSU Center for Spatial Systems Biomedicine

8 <sup>2</sup>Knight Cancer Institute

9 <sup>3</sup>Department of Cell and Developmental Biology

10 Oregon Health & Science University, Portland, OR 97239, USA

11 <sup>4</sup>Department of Radiology, Brigham & Women's Hospital

12 Harvard Medical School, Boston, MA 02115, USA

13 <sup>5</sup>Division of Oncologic Sciences

14 Oregon Health & Science University, Portland, OR 97239, USA

15 <sup>6</sup>Lead Author

16 \*Correspondence: [ojonas@bwh.harvard.edu](mailto:ojonas@bwh.harvard.edu) (O.J.), [grayjo@ohsu.edu](mailto:grayjo@ohsu.edu) (J.W.G.)

17

18 **SUMMARY**

19 Better methods are needed to identify effective combinations of immunotherapies with  
20 chemotherapies and targeted anti-cancer agents. Here we present a Multiplex Implantable  
21 Microdevice Assay (MIMA) system for rapid *in vivo* assessment of the effects of multiple,  
22 spatially separate anticancer drugs directly in the complex tumor microenvironment. In  
23 prototypic experiments, olaparib, lenvatinib, palbociclib, venetoclax, panobinostat, doxorubicin,  
24 and paclitaxel and combinations thereof were administered simultaneously to murine mammary  
25 tumor models. Quantitative multiplex immunohistochemistry and spatial systems analyses of  
26 each local drug response defined cellular relations of fibroblasts, endothelial cells, immune  
27 lineages, immunogenic cell death, tumor proliferation and/or cancer stem cells that were used to  
28 predict effective drug combinations. A predicted combination of panobinostat, venetoclax and  
29 anti-CD40 showed long-term anti-tumor efficacy in multiple mouse models with no observable

30 toxicity when administered systemically. Future MIMA use promises to design effective drug  
31 combinations for tumor cell control and immune activation on a personalized basis.

32

### 33 **KEYWORDS**

34 personalized combination treatments, tumor microenvironment, implantable microdevice, spatial  
35 systems analyses

36

### 37 **INTRODUCTION**

38 Modern cancer therapies increasingly seek to effect tumor control by simultaneously attacking  
39 tumor intrinsic vulnerabilities, enhancing anti-tumor immune activity and/or mitigating stromal  
40 mediators of resistance. Targeted drugs typically are designed to attack genetic or transcriptional  
41 vulnerabilities on which tumor cells depend for survival but non-malignant cells do not.

42 Genomic screening approaches have supported such tumor-intrinsic aspects of precision  
43 medicine, leading to matching of genomic aberrations with specific targeted agents (Li et al.,  
44 2021). In breast cancer, treatments targeting tumors that depend on estrogen receptor (ER)  
45 signaling, aberrant signaling resulting from human epidermal growth factor receptor 2 (HER2)  
46 amplification and/or over expression, CDK4/6 signaling and defects in DNA repair in triple  
47 negative breast cancer (TNBC) have been particularly effective (Bettaieb et al., 2017; Hanker et  
48 al., 2020; Harbeck et al., 2021; Lord and Ashworth, 2017). Unfortunately, these treatments are  
49 not uniformly effective even in primary tumors carrying the target and are usually only  
50 transiently effective in metastatic disease (Brady et al., 2017; Janiszewska et al., 2021; Jeselsohn  
51 et al., 2017). This may be due in part to drug modulation of aspects of the tumor  
52 microenvironment (TME) including immune function that negatively influence cancer control.  
53 This suggests that treatment efficacy can be increased by combing these drugs with agents that  
54 increase immunogenicity and/or counter microenvironment-mediated resistance, a hypothesis  
55 that we address in this paper.

56 The concept of enhancing cancer treatment efficacy by combining chemotherapies and targeted  
57 drugs with agents that enhance immune-mediated cancer cell killing is increasingly well  
58 established. The clearest example is the use of immunotherapies, including immune checkpoint  
59 blocking (ICB) antibodies as complements to tumor targeted therapies in various liquid and solid

60 malignancies (Dummer et al., 2020; Robert, 2020). However, many cancers do not benefit from  
61 ICB including in breast cancer where efficacy has been limited to a subset of TNBC patients  
62 (Adams et al., 2019; Force et al., 2019). This lack of efficacy is attributed in part to two  
63 mechanisms: i) Low antigenicity through decreased expression of major histocompatibility  
64 complex class I (MHC-I)—observed mainly in luminal ER+ BC (Brady et al., 2017; Lee et al.,  
65 2016) and HER2+ BCs (Inoue et al., 2012; Janiszewska et al., 2021); and ii) a naturally  
66 immunosuppressive TME associated mainly with TNBC and HER2+ BC (Denardo et al., 2011;  
67 Gil Del Alcazar et al., 2017; Guerrouahen et al., 2020). Both of these mechanisms may limit the  
68 CD8+ T cell-mediated anti-tumor response, which then cannot be leveraged to improve efficacy  
69 of ICB therapies (Palucka and Coussens, 2016). Combinations of conventional chemotherapies  
70 and/or targeted anticancer drugs that increase immunogenic cell kill promise significant  
71 improvements in overall outcome (Galluzzi et al., 2018). However, further understanding of  
72 drug-immune system interactions is required to design effective and safe immune modulating  
73 combinatorial regimens.

74 A variety of experimental approaches have been deployed to elucidate the effects of drug  
75 combinations on the tumor and stromal components and to identify biomarkers that inform on  
76 the efficacy of treatment combination decisions (Letai, 2017). Biomarkers typically are identified  
77 by establishing associations between tumor features and outcomes in population-based clinical  
78 studies (Hellmann et al., 2018; Hugo et al., 2016) such as those supported by The Cancer  
79 Genome Atlas (Hutter and Zenklusen, 2018) and Human Tumor Atlas Network (Rozenblatt-  
80 Rosen et al., 2020) programs. However, these association-based approaches need to be tested for  
81 causality in systems that faithfully recreate the interactions of the various components of the  
82 TME. Common model systems include tumors that arise in immune competent mice and short-  
83 or long-term ex vivo cultures comprised of tumor and stromal components using miniscule  
84 scaffolds and active fluidics to closely model specific aspects of the TME (Deng et al., 2017;  
85 Jenkins et al., 2017; Tatárová et al., 2016). However, these studies in mice typically are slow,  
86 expensive and labor-intensive, and comprehensive modeling of tumor-microenvironment  
87 interactions in ex vivo systems remains a major challenge (Yuki et al., 2020).

88 We report now on a high-throughput in vivo approach to rapidly, safely and efficiently assess the  
89 effects of multiple drug combinations on TME composition and architecture in living mouse  
90 models that is also applicable to humans (Dominas et al., 2021). Our study focuses on mouse

91 mammary cancers and our approach integrates two recently introduced high-throughput and  
92 high-content techniques: a minimally invasive implantable microdevice (IMD) (Jonas et al.,  
93 2016, 2015; Watson et al., 2018) for intratumor delivery of nanoliter doses (nanodoses) of  
94 multiple drugs or drug combinations into spatially separate regions, and multiplexed  
95 immunohistochemistry (mIHC) (Lin et al., 2015; Tsujikawa et al., 2017) to assess the in-situ  
96 responses of the tumor-microenvironment milieu near each drug delivery site. Computational  
97 analyses of serial mIHC staining and imaging of 30+ proteins allow comprehensive  
98 categorization of standard immune and non-immune stromal cell types and states as well as  
99 complementary characterization of tumor proliferation, apoptosis, differentiation and/or  
100 immunogenicity. Assessment of the composition and spatial distribution of the functionally  
101 different cell types in each drug delivery area facilitates identification of drug-mediated  
102 mechanisms of response and resistance that rapidly reveal new therapeutic intervention  
103 strategies. We refer to the overall approach as the Multiplex Implantable Microdevice Assay  
104 (MIMA).

105 We used the MIMA to evaluate the effects of FDA approved drugs olaparib, palbociclib,  
106 doxorubicin, venetoclax, panobinostat, lenvatinib and paclitaxel and combinations thereof on the  
107 tumor and TME, in the immunocompetent MMTV-PyMT (mouse mammary tumor virus-  
108 polyoma middle tumor-antigen) mouse model. This commonly used genetically engineered  
109 mouse model for breast cancer research mirrors many aspects of human breast cancer  
110 progression and heterogeneity (Attalla et al., 2021; Guy et al., 1992; Lin et al., 2003). Out of  
111 eight treatments tested, five showed unique, significantly enriched histopathological signature  
112 that we used to predict synergistic TME modulating combination treatments that subsequently  
113 were validated in traditional systemic dosing studies. Among these, the combination of  
114 panobinostat, venetoclax and agonist anti-CD40 monoclonal antibodies (mAB) provided the  
115 strongest response for long-term disease control in multiple models of mammary carcinoma and  
116 was well-tolerated.

117

## 118 **RESULTS**

### 119 **MIMA components and design to identify effective TME modulating combination** 120 **treatments**



121 The IMD used for drug delivery in the MIMA system was a 5.5 mm long, 0.75 mm diameter  
122 biocompatible resin cylinder capable of delivering multiple drugs or drug combinations at up to  
123 18 spatially separate regions inside a living tissue per device (Figure 1A). IMDs were loaded  
124 with drugs in pegylated semi-solid form within the wells of the cylinder so that drugs were  
125 released upon implantation via passive diffusion (Jonas et al., 2015). Local concentrations of  
126 drugs in the IMD were tuned to produce drug levels at each site in the tissue to match those  
127 achieved during systemic treatment in clinical practice (Figure S1A and Table S1) (Jonas et al.,  
128 2016). Importantly, the miniscule nanodoses of drugs delivered via IMDs do not generate the  
129 toxicities typically associated with systemic treatments (Jonas et al., 2015).

130 After treatment for 1 to 8 days, tumors were harvested with the IMD in place, prepared as  
131 formalin-fixed, paraffin-embedded (FFPE) samples and serial tissue sections were cut orthogonal  
132 to the axis of the IMD (Figure 1A). Sections through each drug delivery well in the IMD were  
133 analyzed implementing mIHC (Figure S1B) according to published procedures (Chang et al.,  
134 2017; Tsujikawa et al., 2017) to assess drug effects using a range of markers with specificity  
135 being cross-validated using cyclic immunofluorescence (cycIF) (Lin et al., 2015) (Figure S1C-  
136 F). mIHC generated multiprotein images of each tissue section through a process of serial  
137 immunostaining, imaging and stripping of each FFPE section (Figure 1B, Figure S1B) using  
138 antibodies to proteins that define cell types and/or functions *in situ* (Figure 1C, D and S2A). In  
139 our studies, 30+ proteins were interrogated for each section. Each mIHC image was analyzed by  
140 segmenting individual cells and calculating cell positivity for each segmented cell (Figure 1C,  
141 S2B-D). The mIHC antibody panel (Figure 1D, Table S2 and S3) was specifically designed to  
142 capture a broad range of TME states and to identify actionable phenotypes with preferential  
143 detection of early and local responses (Table S4).

144 We implemented a binary gating strategy (Figure 1E, S2E) using measurements of 13 proteins  
145 (Epcam, CD45, CD31,  $\alpha$ SMA, CD3, CD4, CD8, CD11b, F4/80, CSF1R, CD11c, Ly6G, MHC-  
146 II; Figure 1D, S2A; baseline discovery panel) to define 17 major tumor cell types or states with  
147 focus mostly on immune and non-immune stromal cells. We refer to these cells as “standard cell  
148 types” hereafter. They included, for example, T cells (Epcam-CD45+CD3+), antigen presenting  
149 macrophages (Epcam-CD45+F4/80+CD11c-MHC-II+), immature myeloid cells (Epcam-  
150 CD45+F4/80-CD11c-Ly6G-CD11b+MHC-II-) and endothelial cells (Epcam-CD45- $\alpha$ SMA-

151 CD31+). For the full list see [Figure 1F](#). We measured the abundances and spatial organizations  
152 of these standard cell types for all test conditions to narrow down the target stromal phenotypes  
153 in a controlled and unbiased manner. Then, we interrogated additional proteins to refine the  
154 standard cell types and/or to report on other aspects of tumor and stromal cell biology including  
155 on basic drug sensitivity (CC3, Ki67), immunogenic cell death and/or processes typically  
156 associated with resistance or breast cancer progression such as cancer stem cells (Epcam+CD45-  
157 PyMT+Ki67-Sox9+), invasion (Keratin-14, K14); or immune suppression (arginase-1, arg-1)  
158 ([Figure 1D](#); extended readout).

159

### 160 **Quantification of single cell events at local delivery sites reveal unique drug specific** 161 **histopathological signatures of TME response**

162 We used the MIMA system to perform a small-scale screening study in which we quantitatively  
163 assessed the responses to five FDA approved targeted therapies and two chemotherapeutic agents  
164 with distinct modes of action. The targeted drug were the poly (adenosine diphosphate [ADP])  
165 ribose polymerase (PARP) inhibitor, olaparib (Lord and Ashworth, 2017); the multi-kinase  
166 vascular endothelial growth factor receptor (VEGFR)-1/2/3 inhibitor, lenvatinib (Kato et al.,  
167 2019); the cyclin dependent kinase (CDK)-4/6 inhibitor, palbociclib (Harbeck et al., 2021); the  
168 B-cell lymphoma (BCL)-2 inhibitor, venetoclax (Montero and Letai, 2018); and the pan- histone-  
169 deacetylase (HDAC) inhibitor, panobinostat (Atadja, 2009). The chemotherapeutic drugs were  
170 the DNA-intercalating agent, doxorubicin and the microtubule poison, paclitaxel, which are often  
171 used in first line therapy for breast cancer (Cardoso et al., 2018; Kumar et al., 2018). We  
172 assessed responses in late stage MMTV-PyMT mice with spontaneously growing tumors that  
173 mirror the morphology and aspects of progression of human breast cancers (Guy et al., 1992).  
174 These tumors initially express ER strongly but expression decreases as they progress to late-  
175 stage carcinoma (Lin et al., 2003). Gene expression profiling reveal that tumors cluster with the  
176 luminal B subtype at the stage used herein (Herschkowitz et al., 2007; Lin et al., 2003). We  
177 chose a spontaneous rather than transplanted tumor model to better account for all stages of  
178 immune-biology associated with de novo tumor progression (Hanahan and Coussens, 2012),  
179 including editing (Dunn et al., 2004).

180 IMDs loaded with individual agents were implanted in tumors for three days since our previous  
181 work indicated that TME responses were apparent by this time (Watson et al., 2018). Our  
182 analyses of harvested tumors focused on the cell and molecular compositions and organizations  
183 that were significantly enriched in regions close to the drug deliver sites compared to remote  
184 intratumoral controls (Figure 1G). Quantification of the 17 standard cell types following seven  
185 candidate drug exposures revealed unique drug-specific histopathological signatures of TME  
186 response that are summarized in Figure 1H with Figures 1I-L showing computed images of the  
187 most prominent response cell types after treatment. Lenvatinib and paclitaxel produced no  
188 detectable local TME changes; olaparib was associated with a modest increase in macrophage,  
189 neutrophil and fibroblast density, whereas doxorubicin induced a significant increase in  
190 vasculature (Figure 1H). Palbociclib, venetoclax, and panobinostat produced significant  
191 ecosystem changes in both the immune and non-immune stromal states and thus we studied and  
192 described these targeted anti-cancer agents in more detail in the following sections. Predicted  
193 effective combinations derived from these studies (Table S4) were then validated in whole  
194 animals implementing commonly used murine mammary cancer cell lines (E0771 and/or EMT6  
195 models (Herschkowitz et al., 2007)) allografted into syngeneic immunocompetent hosts.

196

### 197 **Palbociclib induces enrichment of CSF1R<sup>+</sup> macrophages associated with pericyte** 198 **branching and de novo tumor proliferation**

199 Intratumoral treatment with the CDK4/6 inhibitor, palbociclib, induced a significant  
200 accumulation of several stromal cell types into the assay area including leukocytes, endothelial  
201 cells, pericytes and mesenchymal cells (Figure 1H, J, Figure 2A, Figure S3A, B). Among  
202 leukocytes, colony-stimulating factor 1 receptor (CSF1R)-positive macrophages were the most  
203 enriched subset (Figure 1H, 2A) but only 9% were positive for class II major histocompatibility  
204 complex (MHC-II) (Figure S3C) indicating these macrophages are not professional antigen  
205 presenting cells (APCs) and may be protumorigenic (Kowal et al., 2019; Reis E Sousa, 2006).  
206 CSF1R<sup>+</sup> cells, in general, were uniquely and significantly enriched by palbociclib (Figure 2A, B  
207 and S3A, D), however, the marker was not solely expressed on macrophages as defined by the  
208 standard cell type classification (Figure 1F). Extended mIHC analyses revealed that CSF1R also  
209 was expressed on epithelial cells, fibroblasts and endothelial cells (Figure 2C). The majority  
210 (46%) of CSF1R<sup>+</sup> cells were positive for the F4/80 macrophage and CD11b pan-myeloid

211 markers, however, the CD45 leukocyte marker was under the detection limit of IHC (Epcam-  
212 CD45-CD31- $\alpha$ SMA-F4/80+CD11b+CSF1R+; [Figure 2C](#), [S3B](#), [D](#)) indicating they might be less  
213 differentiated protumorigenic macrophages (Deszo et al., 2001; Norazmi et al., 1989; Sophie  
214 Mokas et al., 2009). Spatial analyses showed that while the CD45+ macrophages were localized  
215 to regions immediately proximal to the drug delivery well, CD45- less-differentiated  
216 macrophages were localized both proximally and more distally and in some regions were  
217 associated with the contractile pericytes (Epcam-CD45- $\alpha$ SMA-CD31+) (Bergers and Song,  
218 2005) ([Figure 2B-D](#)). This spatial distribution is apparent in a profile plot ([Figures 2D](#), [S3B](#))  
219 which shows the relative abundance of cells at increasing distances from the drug delivery well.  
220 We also assessed the propensity of specific cell types to cluster together by mapping the  
221 locations where 10 or more cells of a defined phenotype occurred together in regions 30, 50 or  
222 75  $\mu$ m in diameter ([Figure 2E](#) and [S3E](#)). The selection of cluster sizes was based on the highest  
223 variance between palbociclib treated and PEG control regions excluding strategies that showed  
224 treatment unspecific clusters in untreated regions (e.g. clusters of as few as 5 cells or distances of  
225  $\geq 100$   $\mu$ m; [Figure S3F](#)). These analyses showed that the CSF1R+ macrophages and CD31+  
226 endothelial cell/pericyte structures were organized together in response to palbociclib drug  
227 stimulus and did not appear in PEG control tissues. The patterns for the CD31+ cell aggregates  
228 were branch-like with pericytes integrated within endothelial structures suggestive of  
229 neovascularization and blood pressure/flow control (Bergers et al., 2003) ([Figure 2E](#), [S3E](#)). The  
230 profile plot and distance-based cluster analyses also showed clusters of Ki67-positive neoplastic  
231 cells (Epcam-CD45+PyMT+Ki67+) distal to the drug delivery site and proximal to the  
232 macrophage-pericyte networks ([Figure 2D](#), [E](#) and [S3B](#), [D](#) and [E](#)) indicating that the macrophage-  
233 pericyte structures may be linked to the increased tumor cell proliferation in local microculture  
234 as summarized schematically in [Figure 2F](#). The high density of CSF1R on multiple cell types and  
235 the associated increase in Ki67+ tumor cells suggested to us that compounds targeting the  
236 CSF1/CSF1R axis might enhance palbociclib efficacy by countering these CSF1R-mediated  
237 processes ([Table S4](#)).

238 We tested this concept in a systemic study of the EMT6 breast cancer model, by treating mice  
239 bearing orthotopically implanted tumors into the mammary fat pads of immunocompetent  
240 syngeneic mice with intraperitoneal injections of palbociclib, an anti-CSF1R antibody and a

241 combination of the two. Whereas the individual drugs did not impact the rate of tumor growth,  
242 the combination treatment significantly reduced tumor growth rate (Figure 2G). Thus, the  
243 efficacy of palbociclib/anti-CSF1R revealed by analyses of responses to intratumoral treatments  
244 was affirmed in whole animal experiments.

245

### 246 **Venetoclax recruits phenotypically distinct clusters of dendritic cells, immature myeloid cells** 247 **and endothelial cells**

248 Intratumor treatment with the BCL-2 inhibitor venetoclax, did not produce significant cell death  
249 as indicated by IHC staining for cleaved caspase 3 (CC3) (see Figure 4C). However, it resulted  
250 in significant recruitment of leukocytes including dendritic cells (DCs), immature myeloid cells;  
251 and endothelial cells to the region proximal to the drug release well (Figures 1H, K and 3A and  
252 S4). Unlike palbociclib, the endothelial cells were not associated with  $\alpha$ SMA (Figure 3B)  
253 suggesting they form small blood vessels (Bergers et al., 2003) that are not supported by  
254 pericytes. The recruitment of dendritic cells is noteworthy since they play important roles in  
255 regulating the balance between immune tolerance and activity (Domogalla et al., 2017).  
256 Interestingly, CD11c<sup>+</sup> cells (primarily a dendritic cell marker) aggregated into clusters in regions  
257 near venetoclax delivery, but not in random intratumoral regions far from the drug releasing  
258 reservoir (Figure 3C). The clusters were phenotypically distinct as defined by their morphology  
259 and positivity for Epcam, CD45, MHC-II and CD11b (Figure 3D, E). The dendritic cell clusters  
260 located nearest to the drug delivery well were intermixed with neoplastic cells, exhibited brighter  
261 and smaller nuclei, (Figure 3D; 1a and 1b) and greater than 60% of this population  
262 Epcam<sup>+</sup>CD45<sup>-</sup> (Figure 3E, S4C) suggesting these cells might be phagocytic DCs (Goodridge et  
263 al., 2011). Dendritic cells further from the reservoir were aligned and intermixed with endothelial  
264 cells (Figure 3D; 3), possibly resulting from migration from/to the TME and they were the only  
265 population expressing MHC-II (Figure 3B and E) (Kedl et al., 2017). Thus, only a small subset  
266 of the DCs recruited to the venetoclax well were antigen presenting cells. DCs distal from the  
267 reservoir were mostly present in tumor cleared areas (Figure 1K and 3D; top right). These cells  
268 were CD11b and CD45 positive (Figure 3E) and all three stains CD45, CD11b and CD11c  
269 showed a “bulls-eye” pattern around an unstained cytoplasmic area centered on the nucleus

270 (Figure 3D; 4). The surface CD45 expression and the “bulls-eye morphology” suggest these cells  
271 were unstimulated DCs (Goodridge et al., 2011).

272 It is thus far unknown whether the spatially separated and phenotypically distinct DC clusters are  
273 functionally related, or whether they were induced by venetoclax as separate entities (Figure 3F).  
274 However, the literature suggests that MHC-II negative DCs have limited antigen presenting  
275 potential and limited capacity to prime T cells (Reis E Sousa, 2006). Additionally, unstimulated  
276 DCs as well as immature myeloid cells, which also were significantly enriched near the  
277 venetoclax well (Figure 1H, K, 3A, and S4A, C), have been reported to induce immunological  
278 tolerance (Domogalla et al., 2017; Griffiths et al., 2016; Sotomayor et al., 1999) raising the  
279 possible therapeutic utility of agents that could mitigate the tolerogenic potential of these cells  
280 (Table S4). Agonist monoclonal anti-CD40 antibodies act on DCs and immature myeloid cells  
281 by increasing their antigen presenting capacity, maturation and activation potential (called  
282 licensing) (Sotomayor et al., 1999). Licensed DCs have the capacity to shift the balance from  
283 tolerance to anti-tumor immunity (Griffiths et al., 2016; Hoves et al., 2018; Kowal et al., 2019).  
284 We reasoned that anti-CD40 immunotherapy could be used to enhance the anti-tumor immune  
285 capacity of DCs and immature myeloid cells that were recruited by venetoclax treatment (Figure  
286 3F).

287 We tested this concept in E0771 breast cancer cells grown orthotopically in the mammary fat  
288 pads of immunocompetent C57BL/6 mice by treating systemically with intraperitoneal injections  
289 of venetoclax, an anti-CD40 agonist antibody and a combination of the two. Neither agent was  
290 effective as a single drug but the combination of the two significantly reduced the tumor growth  
291 rate and increased overall survival with 60% of mice surviving for >180 days (Figure 3G). For  
292 comparison, the combination of venetoclax with a programmed death ligand-1 (PD-1) inhibitory  
293 antibody did not significantly affect tumor growth rate or survival (Figure 3G). Again, a  
294 therapeutic strategy suggested by the MIMA proved to be effective in whole animal experiments.

295

### 296 **Panobinostat induces immunogenic cell death associated with recruitment of antigen** 297 **presenting neutrophils and macrophages**

298 Intratumor delivery of the pan-HDAC inhibitor, panobinostat, led to significant recruitment of  
299 several immune cell populations including dendritic cells, antigen presenting macrophages and



300 (antigen presenting) neutrophils (Figure 1H, L, 4A and S5A, B). The cells located *immediately* at  
301 the drug releasing well were MHC-II positive antigen presenting macrophages (Figure 1L, 4B,  
302 5A and S5B-C). The presence of such macrophages inside tumor nests has been associated with  
303 better clinical responses, improved survival and improved efficacy of PD-1/programmed death  
304 ligand-1 receptor (PD-L1) therapies (Guerriero et al., 2017; Kawai et al., 2008). Depletion of  
305 these macrophages using a CSF1R inhibitor significantly decreased panobinostat-induced cell  
306 death (Figure 4C) implying this immune subset has a functional, anti-tumor role. This result is in  
307 line with previous studies showing that concurrent depletion of macrophages abrogates the anti-  
308 tumor efficacy of HDAC inhibitors (Guerriero et al., 2017).

309 Neutrophils were the most abundant immune population recruited to the panobinostat well  
310 (Figure 1H, 4A) and these were organized in a band slightly farther from the well than  
311 macrophages (Figure 1L, 4B, E and S5B, C). Neutrophils are considered to be rapid responders  
312 in the first line of defense against pathogens and classically are not categorized as professional  
313 antigen presenting cells as compared to DCs, B-cells, monocytes and macrophages which have  
314 superior ability to prime naïve T cells in some settings (Lin and Loré, 2017; Reis E Sousa, 2006).  
315 However, 13% of neutrophils were MHC-II-positive (Figure 4F) suggesting they have undergone  
316 strong phenotypic maturation (Garg et al., 2017). MHC-II-positive neutrophils have recently  
317 been linked to immunogenic cell death (ICD) during which they phagocytose dying tumor cells  
318 and mediate respiratory-burst-dependent cytotoxicity against residual cells (Garg et al., 2017).  
319 Interestingly, panobinostat was the only one of the seven drugs tested that induced substantial  
320 cell kill near the drug delivery site as indicated by significantly increased CC3 expression  
321 (Figure 4C, D). Based on our observation of a significant enrichment of MHC-II+ antigen  
322 presenting neutrophils at the panobinostat well, we hypothesized that panobinostat-mediated cell  
323 death would be immunogenic and the efficacy of this targeted therapy would be enhanced by  
324 PD-1 blockade.

325 We confirmed that panobinostat-induced tumor killing was immunogenic by performing a whole  
326 animal vaccination study (Ma et al., 2013; Md Sakib Hossain et al., 2018). Specifically, aliquots  
327 of E0771 and EMT6 tumor cells treated with panobinostat *in vitro* or killed by freeze thawing  
328 (negative control for non-immunogenic cell death) were injected subcutaneously into syngeneic  
329 immunocompetent mice, and then mice were then re-challenged with live tumor cells of the  
330 same type after seven days. We observed significantly increased tumor-free survival in mice



331 immunized with panobinostat-treated tumor cells as compared to mice inoculated with untreated  
332 freeze-thawed dead cells (P value <.0001 and 0.0027 for E0771 and EMT6, respectively; [Figure](#)  
333 [4G](#)). Consistent with this, systemic treatment of mice with panobinostat significantly increased  
334 the proportion of intratumoral CD8<sup>+</sup> T cells as compared to stromal parenchyma ([Figure 4H](#) and  
335 [Figure S5D](#)).

336 Next, we tested the utility of combining panobinostat with an anti-PD-1 antibody by systemically  
337 treating mice carrying syngeneic mammary tumors with these drugs administered singly and in  
338 combination. Panobinostat alone significantly decreased the rate of tumor growth in early-stage  
339 tumors ([Figure S5E](#)) but later stage tumors did not respond to the single agent ([Figure 4I](#), [S5F](#)).  
340 However, combining panobinostat with anti-PD-1 immunotherapy, as suggested by our MIMA  
341 studies, significantly decreased tumor growth rate and increased survival in both EMT6 and  
342 E0771 models ([Figure 4I](#), [6H](#)) thus indicating effective induction of antitumor immunity.

343

#### 344 **Biomarkers of response and mechanisms of resistance help to identify early intratumor** 345 **signatures of panobinostat-induced anti-tumor immunity in mammary carcinoma**

346 Because our local and systemic studies indicated panobinostat to be increasing immunogenicity  
347 of mammary carcinoma ([Figure 4](#), [S5](#)), we further evaluated potential mechanisms of response  
348 and resistance associated with this targeted therapy. We extended the mIHC readout to enable  
349 assessment of functional biomarkers related to induced anti-tumor immunity by adding  
350 antibodies to probe expression of calreticulin which facilitates folding of the MHC-I complex in  
351 the endoplasmic reticulum (Raghavan et al., 2013) and dictates immunogenicity of cell death  
352 (Obeid et al., 2007), intercellular adhesion molecule 1 (ICAM1) and the  $\beta$ -galactoside-binding  
353 lectin, galectin-3; which play roles in recruitment of neutrophils to tissues (Gittens et al., 2018;  
354 Yang et al., 2005) and licensing of myeloid cells (Radsak et al., 2000; Vonderheide, 2018),  
355 myeloperoxidase (MPO) to identify cytotoxic neutrophils (Patnaik et al., 2017), and MHC-I and  
356 neuropilin-1 to report on proficient antigen presentation capacity (Chawla et al., 2016; Kerros et  
357 al., 2017; Luo et al., 2018). These early in situ markers as well as PD-L1 have been directly or  
358 indirectly associated with immunogenic cell death, increased tumor CD8<sup>+</sup> T cell infiltrate and/or  
359 immune checkpoint blockade efficacy (Aguilera et al., 2016; Guerriero et al., 2017; Hu and  
360 McArthur, 2018; Luo et al., 2018; Obeid et al., 2007; Patnaik et al., 2017). We measured the

361 expression of these proteins at the panobinostat reservoir and refer to them in ensemble as  
362 “biomarkers of immunogenic cell death” (Figure 1D, in yellow). We also added antibodies to  
363 probe resistance mechanisms associated with breast cancer progression; specifically, the cancer  
364 stem cell (CSC) marker, Sox9 (Guo et al., 2012); the immune suppression marker arginase-1  
365 (Geiger et al., 2016; Rodriguez et al., 2017); Keratin-14 as a marker of the tumor invasive front  
366 (Cheung et al., 2016, 2013); and matrix metalloproteinases (MMPs) and collagens as markers of  
367 extracellular matrix (ECM) processing and deposition (Sahai et al., 2020) (Figure 1D, in blue).  
368 We assessed the locations of the 17 standard cell types and the expression of the various  
369 biomarkers of response and resistance thereon and found that they were organized in distinct  
370 layers (zones) at increasing distances from the panobinostat delivery well. These zones were  
371 designated as *immediate*, *proximal*, *border*, *distal* and *remote* as illustrated in Figure 5B.

372 Antigen presenting macrophages were located in the *immediate* region at the panobinostat well  
373 such as described above (Figure 5A, B). The *proximal* region was populated predominantly by  
374 neutrophils. These and other cells expressed MPO, ICAM1 and neuropilin-1 (Figure 5A-C,  
375 Figure S5C, SA, B). More than half (65%) of Ly6G<sup>+</sup> neutrophils were positive for MPO (Figure  
376 S6C) suggesting they have cytotoxic capacity. Co-treatment with panobinostat and an anti-Ly6G  
377 antibody decreased panobinostat mediated cell death implying that these neutrophils have anti-  
378 tumor function as a result of the drug’s mechanism of action (Figure S6D). These results indicate  
379 that recruitment/induction of cytotoxic neutrophils is an important mechanism by which  
380 panobinostat causes cell death. We expected ICAM-1 to be expressed in the perivascular space  
381 (Patnaik et al., 2017). However, it was mostly expressed on neutrophils (44%), tumor cells  
382 (37%) and DCs (10%, Figure 5E). The expression of ICAM-1 by myeloid cells including  
383 neutrophils suggests that they might be activated and capable of priming T cells to induce anti-  
384 tumor immunity (Banchereau and Steinman, 1998; Radsak et al., 2000). Neuropilin-1 is a  
385 molecule with pleiotropic function and is mostly pro-tumorigenic in other cancers (Graziani and  
386 Lacal, 2015; Matkar et al., 2016; Overacre-Delgoffe et al., 2017); however, in breast cancer, it  
387 was recently reported to improve class I antigen presentation machinery and cross-presentation  
388 (Chawla et al., 2016; Kerros et al., 2017). The majority (up to 88%) of neuropilin-1 positive cells  
389 proximal to the panobinostat well were cytotoxic neutrophils (Figure 5A, C and S5C, S6E, F).  
390 The high phagocytic and tumor-killing potential, high expression of ICAM-1 and mutually  
391 exclusive expression of the immune suppressive molecule arginase-1 on the panobinostat

392 induced neutrophil population (Figure S5C, S6A) indicate these are likely anti-tumor (reported  
393 also as N1) rather than protumor (N2) neutrophils (Fridlender et al., 2009; Shaul et al., 2016).  
394 These results raise the possibility that neutrophils induce increased MHC-I expression on  
395 neoplastic cells and suggest that neuropilin-1 may be a novel biomarker of anti-tumor  
396 neutrophils in BC – hypotheses that remain to be functionally tested.

397 The *distal* region was populated predominantly by tumor cells expressing high levels of galectin-  
398 3, MHC-I, calreticulin and PD-L1 (Figure 5A-E; S5C and S6); the latter being expressed  
399 >500um from the well at the outer border of a galectin-3 rich region (Figure 5D, S6A). Relative  
400 increase of MHC-I and calreticulin expression on the surface of cells was present in a gradient  
401 pattern that was highest in proximal cell death/neutrophil regions and decreased with distance  
402 from the panobinostat well (Figure 5A and S6A). We observed a similar spatial cell organization  
403 in a different genetically engineered BC mouse model – ErbB2 $\Delta$ Ex16 (Turpin et al., 2016)  
404 (Figure S7A, B) highlighting the generality of this phenomenon.

405 Two apparent cellular barrier transition zones co-evolved with the biomarkers of immunogenic  
406 cell death: (i) first at the outer *border* of the proximal neutrophil rich region composed of cancer  
407 stem cells associated with DCs limiting propagation of cell death; (ii) second at the outer border  
408 of galectin-3, MHC-I and calreticulin-rich region *remotely* from the well (Figure 5A-C).

409 The *border* region was populated by CSCs defined as Epcam+CD45-PyMT+ cells with nuclear  
410 expression of Sox9 (Guo et al., 2012) which were intermixed with CC3+ dying cells and cell  
411 debris (Figure 1L, S5B, C). CSCs have been reported to have self-renewal and tumor-initiating  
412 capacity and often exhibit resistance to therapy (Jeselsohn et al., 2017; Xue et al., 2019).

413 Importantly, cellular expression of CC3 and Sox9 staining was mutually exclusive (Figure 5F  
414 and Figure S5C) providing direct *in vivo* evidence that the CSCs were resistant to the most potent  
415 tumor killing therapy in our screen. Inversely, galectin-3 and Sox9 were co-expressed in many  
416 areas in the border region (Figure 5F) and we found that 22% of galectin-3+ cells were CSCs  
417 (Figure 5E). This indicates galectin-3 might be another biomarker enriching CSCs in breast  
418 cancer. Finally, macroscopic profile plots of relative cell abundance (Figure 5A), distance-based  
419 cluster analyses (Figure 5D) and pairwise proximity measurements in Sox9 microcultures  
420 (Figure 5G, H and S6G, H) showed that, among immune cells, CD11c+ dendritic cells were

421 preferentially located in close proximity to the CSCs suggesting functional interactions between  
422 the two cell types.

423 Spindle-shaped  $\alpha$ SMA<sup>+</sup> cells – likely activated fibroblasts – consistently appeared in the *remote*  
424 region (Figure 1L, 5C, S6F). We speculate that these cells may act as a barrier to physically  
425 restrict cellular and molecular movements since they form a sharp boundary that appears to limit  
426 the galectin-3 signal propagation (Figure 5C, top right). This  $\alpha$ SMA barrier became increasingly  
427 prominent at day 8 and more phenotypes emerged at that time that have been associated with  
428 mechanisms of resistance; including K14<sup>+</sup> cells comprising a tumor invasive front, immune  
429 suppressive expression via arginase-1, strong deposition of Collagen VI, Ki67+Ly6G<sup>+</sup> (likely  
430 neutrophil extracellular trap (NET) formation (Albregues et al., 2018)), and accumulation of  
431 Sox9 cancer stem cells in close proximity to both dendritic cells and fibroblasts (Figure S7C).  
432 The transition of galectin-3 from diffuse spreading across the distal zone (Figure 5C, D, S5C and  
433 S6A, F, G), into a sharp barrier (Figure S7C) suggests it may be a resistance marker and critical  
434 component spatially connecting fibroblasts to the CSCs/DCs niche.

435 Pro-tumorigenic macrophages with low expression of CSF1R (Figure S7C) and sparse single  
436 cytotoxic B cells expressing CD45R, granzyme B, galectin-3 and calreticulin (Figure S7D)  
437 appeared at the outer edge of the resistant zone remotely from the well at day 8 of panobinostat  
438 exposure. Expression and spatial association of galectin-3 with functionally distinct – both  
439 response and resistance – phenotypes (calreticulin, antigen presentation, cytotoxicity, PD-L1,  
440 stem cells, immune suppression) suggest a broad and possibly time-dependent function of this  
441 protein indicating that targeting galectin-3 during immunogenic cell death should be carefully  
442 considered (Figure S6D). While quantitative evaluation of the spatial cell composition of  
443 immunogenic cell death across multiple time points is outside the scope of this study, the  
444 appearance of spatially segregated phenotypes after three and eight days shows that spatial  
445 assessment of cellular responses with increasing distance from the reservoir provides insight into  
446 the sequence of emerging cellular events that follow treatment (Figure S7A) and ultimately may  
447 be reverse engineered to devise effective treatment schedules (Figure 5I, Figure S8). The cause-  
448 consequence spatial cell associations describing the early in situ events of induced anti-tumor  
449 immunity in BC are summarized in Figure 5I.

450

451 **Combination of panobinostat, venetoclax and anti-CD40 immunotherapy maximizes tumor**  
452 **killing and immune surveillance in mammary carcinoma**

453 We used information from additional MIMA analyses to identify drugs that would enhance  
454 panobinostat mediated tumor killing and immune-modulation. In one analysis, we assessed  
455 effects by combining panobinostat with other drugs in individual MIMA reservoirs. We  
456 decreased the baseline concentration of panobinostat to approximately 25% of the original  
457 concentration in order to facilitate identification of highly synergistic combinations. We then  
458 measured the relative increase of cell death (CC3) and leukocyte density (CD45) compared to  
459 control and panobinostat treatments after 3 days. Combinations of panobinostat with venetoclax,  
460 doxorubicin and palbociclib were highly effective at increasing cell death and leukocyte density.  
461 Combining panobinostat with venetoclax significantly potentiated immune modulation, while its  
462 combination with doxorubicin significantly increased tumor kill (Figure 6A). In a second  
463 analysis, we delivered single drugs in adjacent wells and assessed the effects in regions of drug  
464 overlap between the wells (Figure 6B) over the course of eight days. These studies were carried  
465 out in orthotopic MMTV-PyMT derived mammary tumors. Orthotopic models exhibit a lower  
466 level of non-immune stroma at baseline (Dunn et al., 2004; Yang et al., 2017) and the eight day  
467 exposure was chosen to provide sufficient time for the drugs to diffuse to create a zone of drug  
468 overlap. We focused on the combinations of panobinostat with venetoclax or palbociclib in  
469 subsequent experiments as panobinostat/doxorubicin combination treatment efficacy had been  
470 evaluated previously (Budman et al., 2012).

471 Remarkably, the combination of panobinostat and venetoclax resulted in complete clearance of  
472 tumor cells at the intersection of the two drugs (Figure 6B, Figure S9A, B). The observed TME  
473 responses included significant enrichment of macrophages, dendritic cells, immature myeloid  
474 cells and CD4+ T cells (Figure 1H, 6C, D and Figure S9C). A cluster of MHC-II positive DCs  
475 co-expressing Ki67+ CD4 and CD8 appeared near stroma and assay region (Figure 6E and S9A)  
476 suggesting the drug combination induced intra-tumoral T cell infiltration and stimulation (Broz  
477 et al., 2014). However, this event was rare, and the vast majority of the panobinostat/venetoclax  
478 assay area was dominated by myeloid cells (Figure 1H, 6C and S9C) implying that a myeloid  
479 targeting agent rather than ICB could optimally exploit the panobinostat/venetoclax induced  
480 tumor microenvironmental state.

481 Since CSF1R positive protumorigenic macrophages were not significantly enriched at the  
482 intersection of wells (Figure S9A-C) and the anti-CD40 agonist antibody can positively modulate  
483 DCs, immature myeloid cells (Hegde et al., 2020; Sotomayor et al., 1999) as well as resting and  
484 proinflammatory macrophages (Verreck et al., 2006), we tested the possibility that anti-CD40  
485 immunotherapy would further increase the efficacy of the panobinostat/venetoclax combination  
486 by licensing the accumulated myeloid cell subsets as described above. We tested this by  
487 systemically treating mice bearing EMT6 and E0771 orthotopic tumors and compared the  
488 responses to those obtained using a panobinostat/venetoclax/anti-PD-1 combination. Treatment  
489 with panobinostat/venetoclax/anti-PD-1 significantly reduced the tumor burden as compared to  
490 dual panobinostat/venetoclax and panobinostat/anti-PD-1 (Figure 6G, H) treatments with  
491 survival rates of 40% in mice bearing EMT6 tumors (Figure 6H). The triple combination of  
492 panobinostat/venetoclax/anti-CD40, however, was superior and eliminated visible tumors in  
493 100% of EMT6 tumors and 85% of E0771 tumors, respectively (Figure 6G, H). The antitumor  
494 effect of panobinostat/venetoclax/anti-CD40 against spontaneous tumors arising in the MMTV-  
495 PyMT model, inhibited tumor progression and doubled the overall survival (Figure 6I).

496 We note that none of the combination treatments in whole animal studies were associated with  
497 adverse events, likely because we used lower concentrations of drugs than published previously  
498 (Table S5). We measured underconditioned body score (level 2; as established by (Morton and  
499 Griffiths, 1985)) associated with palbociclib monotherapy treatment; and two out of eight mice  
500 died in the anti-CD40 monotherapy group. Lethal toxicity of anti-CD40 used as a single agent  
501 was previously reported due to a shock-like syndrome (Van Mierlo et al., 2002) and our data also  
502 suggest this immunotherapy is tolerable only with prior administration of anti-cancer agent(s).  
503 Overall, these results suggest the triple combination of panobinostat, venetoclax and anti-CD40  
504 immunotherapy as a highly synergistic therapeutic strategy for long term breast cancer control.

505

## 506 **DISCUSSION**

507 Much research is now underway to develop synergistic multi-drug cancer treatment strategies  
508 that directly target neoplastic cells, enhance anti-tumor immune activation, normalize tumor  
509 vasculature and/or favorably alter aspects of the tumor microenvironment to improve tumor  
510 control. Successful strategies increasingly use combinations of drugs, each of which impacts one



511 or more components of the TME. We developed the MIMA system to efficiently develop  
512 effective combination regimens by assessing tumor cell control and drug-induced changes in  
513 immune and stromal composition, architecture and function that correlate with overall antitumor  
514 efficacy. MIMA attributes include an IMD for delivery of nanoliter doses of multiple drugs, each  
515 delivered into a spatially separate region of a single living tumor growing in an immunologically  
516 intact host; a 30+ multiplex IHC analysis platform that provides a comprehensive description of  
517 tumor and stromal responses to each localized drug treatment and the functional status of  
518 selected immune and other tumor and stromal cells. The approach provides a highly precise,  
519 multiplexed platform to systematically identify candidate biomarkers of response and quantify  
520 cell interactions and to inform on treatment sequencing (Figure S8).

521 While majority of our studies were performed using a three day long microdevice implantation,  
522 the in-dwelling time of the IMD can be varied from a few hours to many days in order to capture  
523 a range of tissue responses and TME reorganization. Importantly, the approach is minimally  
524 toxic even when testing multiple therapies in a single tumor. The local drug doses match  
525 concentrations that are achieved during systemic treatments but are systemically insignificant  
526 such that drug toxicity is negligible. The focal drug delivery begins at the time of implantation,  
527 and follows a characteristic diffusion gradient controlled by the PEG polymer formulation in a  
528 more-or-less radial direction away from each drug delivery well (Jonas et al., 2015). The focal  
529 delivery can then be treated as a spatial and temporal perturbation. Analyses of the responses  
530 produced by devices left in place across a range of time points provide data about drug induced  
531 changes in cellular densities, molecular phenotypes, cell motility and functional interactions. In  
532 addition, analyses of the regions between drug delivery wells where drugs are allowed to overlap  
533 via diffusion serves as a measurement of the effect of the combination of those drugs. Since  
534 distances from the drug delivery wells reflect recruitment events, computational modeling of  
535 these patterns can provide actionable information to guide the development of effective drug  
536 doses and schedules.

537 Although not pursued explicitly in this study, the timing of combination immunotherapies in  
538 whole animals was estimated based on immune component responses at increasing distances  
539 from the drug delivery wells (Figure S8). Many of these effects are difficult or impossible to  
540 study in animal models treated systemically, due to heterogeneous and indeterminate drug



541 distribution that can vary greatly over different regions of a tumor. Importantly, we validate the  
542 significance of the locally observed response phenotypes from MIMA studies by reverse-  
543 engineering combination treatments involving targeted and immuno-therapies (Table S4) that  
544 demonstrate synergistic anti-tumor efficacy in systemic studies. This is particularly important  
545 since it enables systems level studies of the effects of multiple drugs in a single organism, and  
546 leads to accurate predictions of responses to systemic treatments in animal models with intact  
547 immune systems. Furthermore, recent work by Jonas et al has demonstrated that IMD  
548 applications are safe and feasible in patients across multiple cancer indications including breast  
549 cancer, prostate cancer, T cell lymphoma and glioblastoma (Dominas et al., 2021). It may  
550 become feasible then to use the MIMA assay in patients to measure a range of combination  
551 regimens in each patient to guide rational treatment design on a personalized basis.

552 Although intended as proof-of-concept that local nanodose drug phenotypes can effectively  
553 guide systemic treatment strategies, we have already identified specific therapeutic strategies that  
554 warrant clinical consideration. One finding is that the CDK4/6 inhibitor, palbociclib, recruits a  
555 significant number of CSF1R+, MHC II- protumorigenic macrophages that appear to induce  
556 formation of CD31+ endothelial/pericyte networks that contribute to neovascularization and  
557 provide nutrients to support tumor cell proliferation. These results provide direct evidence of  
558 how specific changes in tumor microenvironmental states induced by monotherapy can mediate  
559 acquired resistance. We hypothesized that this protumorigenic resistance phenomenon may be  
560 overcome by combining palbociclib with anti-CSF1R antibody. Our test of this concept in the  
561 EMT6 model demonstrated that systemic treatment with this drug combination significantly  
562 reduced tumor growth.

563 Our studies of venetoclax demonstrated that this BCL-2 inhibitor induced formation of  
564 phenotypically distinct clusters of CD11c+ dendritic cells associated with immature myeloid cell  
565 and endothelial cell enrichment. Many of the dendritic cells were Epcam+, CD45- suggesting  
566 that they were phagocytic, while others shared morphological features of unstimulated myeloid  
567 cells. However, only a small fraction of these cells were MHC-II positive and thus were likely  
568 limited in their ability to respond to available tumor antigens. This finding led us to add an anti-  
569 CD40 immunotherapy to increase antigen presentation, maturation and activation (aka licensing)  
570 in a population that was already poised to have antitumor activity. Our test of this hypothesis in

571 the E0771 model showed that systemic treatment with a combination of venetoclax and an anti-  
572 CD40 agonist indeed reduced tumor growth rate and increased overall survival as predicted  
573 (Figure 3G).

574 Our demonstration that the pan HDAC inhibitor, panobinostat, increased immunogenicity (by  
575 induction of immunogenic cell death and antigenicity; (Yatim et al., 2017)) of mammary  
576 carcinomas when administered locally or systemically in four different animal models of breast  
577 cancer corroborates previous studies showing the importance of HDAC inhibitors as pleiotropic  
578 effectors of many immune surveillance processes (Conte et al., 2018). This immune component  
579 is important in breast cancer since many patients do not benefit from treatments including  
580 immune checkpoint blockade (Force et al., 2019). However, the exact mechanisms by which  
581 HDAC inhibitors influence immune surveillance are still being elucidated (Conte et al., 2018)  
582 and likely vary between inhibitors. Treatment of EMT6 and E0771 model tumors with  
583 panobinostat plus anti-PD-1 increased survival duration and reduced tumor growth rate relative  
584 to treatment controls or to treatment with panobinostat alone (Figure 4H, 6H). However, these  
585 treatments did not achieve long term tumor control and in vaccination studies – not all mice in  
586 either EMT6 and E0771 model rejected the tumor post re-challenge (Figure 4G). These studies  
587 suggest that resistance mechanisms exist that might counter the full potential panobinostat  
588 mediated antitumor immunity and thus we explored this treatment condition in more detail.

589 Our studies indicate that panobinostat enhances anti-tumor immunity by recruitment of antigen  
590 presenting macrophages, cytotoxic and antigen presenting antitumor neutrophils and ICAM-1  
591 positive myeloid cells leading to upregulation of MHC-I and calreticulin expression on tumor  
592 cells. However, this is counterbalanced by the emergence of multiple potential resistance  
593 mechanisms including preferential clustering of dendritic cells with cancer stem cells, the  
594 formation of fibroblast/ECM barriers to treatment and antigen presentation, recruitment of  
595 immune suppressive cells (arg-1), development of highly metastatic tumor cells expressing K14,  
596 NETs and CSF1R+ cells. Recruitment of CSF1R+ cells at a late time point indicatings sequential  
597 or alternating administration of HDAC inhibitors with CSF1/CSF1R targeting agents may be  
598 efficacious while simultaneous dosing is not (Guerriero et al., 2017)) (Figure 4C and S8). Our  
599 studies also identified neuropilin-1 and galectin-3 as candidate biomarkers that may inform on  
600 panobinostat mechanism of action. Neuropilin-1 appears to mark anti-tumor (N1) neutrophils

601 that may potentiate antigen presentation in mammary carcinoma (Chawla et al., 2016; Kerros et  
602 al., 2017) while galectin-3 expression is associated with several anti-tumor endpoints including  
603 increased tumor MHC-I, calreticulin; cytotoxic granzyme B positive B cells as well as pro-tumor  
604 phenotypes (cancer stem cells, immune suppression). The validated biomarker of early induced  
605 antitumor immunity may allow early stratification of breast cancer patients to immune  
606 checkpoint blockade. This concept may be further investigated in window of opportunity  
607 treatment clinical trials.

608 Analyses of the tumor and its microenvironments in regions of panobinostat and venetoclax  
609 intersection revealed almost complete tumor clearance. These two targeted anticancer agents  
610 worked together to increase total intratumoral immune cell counts – panobinostat by inducing  
611 neutrophils and macrophages and venetoclax by inducing recruitment of DCs and immature  
612 myeloid cells. Importantly, all these myeloid cells can be positively modulated by anti-CD40  
613 immunotherapy. DCs are generally thought to be the main antigen presenting cells which can  
614 activate naïve T cells to become effectors (Mempel et al., 2013). However, CD40 ligation also  
615 upregulates antigen presenting molecules and adhesion molecules such as ICAM-1 and increases  
616 the type-1 proinflammatory state to support immunogenic processes in neutrophils, resting and  
617 proinflammatory macrophages and immature myeloid cells (Oehler et al., 1998; Radsak et al.,  
618 2000; Sotomayor et al., 1999; Verreck et al., 2006) (Figure 6J). Additionally, in pancreatic  
619 cancer, this immunotherapy modulates the TME to degrade fibrosis (Long et al., 2016). It  
620 remains to be determined if such matrix remodeling of the formed fibrotic barriers could also  
621 occur in breast cancer (Figure 6J). Also, the spatial association of DCs and CSCs might be of  
622 particular importance in the panobinostat/venetoclax/anti-CD40 mechanism of action. We  
623 hypothesize that panobinostat induces anti-tumor immunity to bulk tumor while cancer stem  
624 cells remain resistant in the TME. Venetoclax induces recruitment of DCs which we have  
625 revealed to localize specifically to the CSC niche. We propose that if CD40 ligation induces  
626 licensing of DCs which already captured and processed CSC antigen, this might result in  
627 activation of CSC-specific anti-tumor immunity and eventually to complete tumor clearance  
628 (Figure 6J). Thus, we suggest that panobinostat induces antitumor immunity on the level of bulk  
629 tumor, while venetoclax/anti-CD40 induces anti-tumor immunity on the level of resistant, tumor  
630 initiating cancer stem cells. This model of response is so far hypothetical as antigen specific T  
631 cell responses remain to be critically evaluated. Nevertheless, our observations suggest that the

632 combination of lower dose panobinostat/venetoclax/anti-CD40, and the anti-CD40  
633 immunotherapy in general, should be considered clinically for treatment of breast cancer.

634 In sum, the MIMA platform described here provides a strategy to design effective combination  
635 regimens based on intratumor nanodose exposure to a range of agents, coupled with highly  
636 multiplexed phenotyping and integrated spatial analysis of tumor response to each therapy. By  
637 testing multiple therapeutic strategies in the same tumor, we can for the first time perform  
638 systems level analysis using multiple parallel pharmacological perturbations in the same  
639 organism. The low drug toxicity of intratumor nanodosing further supports clinical use of  
640 MIMA, which is currently being investigated in multiple human studies. Thus, MIMA represents  
641 a new approach to identification of effective combination regimens for individual patients on a  
642 personalized basis. Extended use of MIMA will also open new opportunities in *in silico*  
643 modeling to model dynamic drug-tumor-stromal interactions.

644

#### 645 **ACKNOWLEDGEMENTS**

646 We thank the OHSU Histopathology Share Resources core (Todd Camp, Joscelyn Zarceno and  
647 Cheyenne Martin) for careful FFPE processing of the MIMA tumor samples; Young Hwan  
648 Chang, Sam Sivagnanam, Eugene Manley and AeSoon Bensen for help with image processing  
649 and mIHC/cycIF staining; Tiziana Cotechini for sharing the LPA3 mouse model line; and  
650 Marilyn McWilliams and Dottie Waddell breast cancer advocates for valuable feedback during  
651 project reports. This work was supported by the NIH/NCI Cancer Systems Biology Consortium  
652 Center U54CA209988 (JWG), Susan G. Komen grant SAC190012 (JWG) and the NIH grant  
653 R01CA223150 (OJ, LMC).

654

#### 655 **AUTHOR CONTRIBUTIONS**

656 Conceptualization, ZT, OJ, JWG; Methodology, ZT, OJ, JWG; Software, ZT, DCB;  
657 Investigation, ZT, DCB; Data Analysis and Interpretation, ZT, OJ, JWG; Writing – original and  
658 final draft, ZT, OJ, JWG; Writing – review & editing, JEK, LMH, JLM, PJS, SWA, GBM,  
659 LMC; Resources, JLM, LMC, OJ, JWG; Funding, OJ, JWG; Supervision, OJ, JWG.

660

661 **DECLARATION OF INTERESTS**

662 J.E.K. is a cofounder and stock holder of Convergent Genomics.

663 GBM has licensed technologies to Myriad Genetics and Nanostring; is on the SAB or is a  
664 consultant to Amphista, AstraZeneca, Chrysallis Biotechnology, GSK, ImmunoMET, Ionis,  
665 Lilly, PDX Pharmaceuticals, Signalchem Lifesciences, Symphogen, Tarveda, Turbine, and  
666 Zentalis Pharmaceuticals; and has stock/options/financial interests in Catena Pharmaceuticals,  
667 ImmunoMet, SignalChem, and Tarveda.

668 LMC is a paid consultant for Cell Signaling Technologies, Shasqi Inc., and AbbVie Inc.;  
669 received reagent and/or research support from Janssen Research & Development, LLC, Abbott  
670 Labs, Eisai, Inc., ImClone, Aduro Biotech, Inc., Becton Dickinson, Plexxikon Inc.,  
671 Pharmacyclics, Inc., Acerta Pharma, LLC, Deciphera Pharmaceuticals, LLC, Genentech, Inc.,  
672 Roche Glycart AG, Syndax Pharmaceuticals Inc., Innate Pharma, and NanoString Technologies,  
673 and Cell Signaling Technologies; and is a member of the Scientific Advisory Boards of Syndax  
674 Pharmaceuticals, Carisma Therapeutics, Zymeworks, Inc, Verseau Therapeutics, Cytomix  
675 Therapeutics, Inc., and Kineta Inc., HiberCell, Inc., Cell Signaling Technologies, Alkermes, Inc.

676 O.J. is a consultant to Kibur Medical. Dr. Jonas's interests were reviewed and are managed by  
677 BWH and Mass General Brigham in accordance with their conflict of interest policies.

678 JWG has licensed technologies to Abbott Diagnostics, PDX Pharmaceuticals and Zorro Bio; has  
679 ownership positions in Convergent Genomics, Health Technology Innovations, Zorro Bio and  
680 PDX Pharmaceuticals; serves as a paid consultant to New Leaf Ventures; has received research  
681 support from Thermo Fisher Scientific (formerly FEI), Zeiss, Miltenyi Biotech, Quantitative  
682 Imaging, Health Technology Innovations and Micron Technologies; and owns stock in Abbott  
683 Diagnostics, AbbVie, Alphabet, Amazon, AMD, Amgen, Apple, Berkshire, Cisco systems,  
684 Clorox, Colgate Palmolive, Crown Castle Int., Humana, Keysight, Linde, Proctor and Gamble,  
685 Qualcomm, Unilever, Gilead, Intel, Johnson & Johnson, Microsoft, Nvidia, Taiwan  
686 Semiconductor, and Zimmer Biomet.

687 The other authors declare no competing interests.

688

689 **FIGURE LEGENDS**

690 Figure 1. MIMA components and testing of locally induced drug effects on TME

691 (A) Schematic of IMDs implanted into a multifocal mouse model of mammary carcinoma (i).

692 Treatments are released from device reservoirs into spatially separated regions of tumors through  
693 passive diffusion (ii). Following incubation, the tumor is extracted with the device in place and is  
694 formalin fixed paraffin embedded (FFPE). Each condition is assayed individually (iii) using 30+  
695 color staining (B, D).

696 (B) Schematic of the mIHC technique composed of iterative histological staining on a single  
697 FFPE slide which is alternated with digital scanning microscopy to detect the target marker.

698 (C) Acquired images are co-registered with nuclear staining and the mean intensity of antibody  
699 staining within a mask is calculated for each cell to count marker positive cells in an intact tissue.

700 (D) Antibody list used to interrogate a broad range of tumor intrinsic and tumor-  
701 microenvironmental states as categorized and color-coded in the table. DST; drug sensitivity  
702 testing.

703 (E) Multidimensionality reduction in hierarchical gating to classify standard cell types.

704 (F) List of probe combinations from the baseline discovery panel (D, top half) identifying  
705 standard cell types.

706 (G) Macroscopic view of the hematoxylin-stained tumor tissue implanted with IMD.

707 Experimental condition (red box, assay area) was compared to control, untreated intra-tumor,  
708 regions distant from the drug-releasing site (blue boxes). To obtain greater control over  
709 cofounding variables, paired sample one tailed t-tests were used to determine enrichment of  
710 induced TME states.

711 (H) Heatmap of mean percentage of positive cells (left) and level of significance (right) at  
712 depicted targeted agents and chemotherapies (y-axis). Polyethylene glycol (PEG) served as  
713 negative control. Total cell counts to define percentage of positivity were between 3000 to 5000  
714 cells per assay area and were matched  $\pm 300$  total cells for paired samples (experimental vs  
715 control region). Minimum population proportion within 5% margin of error and 95% confidence  
716 level was set to 0.75% (represents 12 cells) to discriminate noise from specific signal. n=3 wells  
717 from 3 tumors from 2-3 mice per treatment. MMTV-PyMT mice with late stage spontaneously

718 growing tumors were implanted for three days. \*For panobinostat/venetoclax (pano/veneto)  
719 condition details see Figure 6C.

720 (I-L) Presentation of selected standard cell types in XY space. [0,0] coordinate is the drug  
721 releasing site; and direction of release is upward.

722

723 Figure 2. Local TME changes induced by targeted therapy palbociclib and whole animal studies  
724 testing the combination efficacy with predicted anti-CSF1R immunotherapy.

725 (A) Quantification of single cell events induced by palbociclib using individual markers and  
726 standard cell type classification. Bars are mean  $\pm$  s.e.; n=3 palbociclib reservoirs in three tumors  
727 from three different mice. Significance was calculated by paired sample one tailed t-test. Only  
728 significantly enriched cells are presented. For quantification of all TME lineages, see [Figure](#)  
729 [S3A](#).

730 (B) Sample composite image of key response markers. Arrow indicates the source and direction  
731 of palbociclib drug release. Dashed lines define the magnified area. Scale bar is 100 $\mu$ m (left);  
732 and 25 $\mu$ m (right).

733 (C) Percentage of top five cell types expressing CSF1R stratified by zones in the palbociclib  
734 assay area. Immediate pool zone analyzed is visualized by the dashed line in [Figure S3D](#). The  
735 number of cells (n) quantified is presented at the top of the figure.

736 (D) Line profile of relative cell abundance as a function of distance from well (left to right).  
737 Assay zones are color-coded in the legend.

738 (E) Distance-based clustering of depicted cell types as a set of XY coordinates. Coordinate [0,0]  
739 identifies the drug source. The direction of the drug release is upward. Clusters were identified  
740 by a minimum 10 cells within maximum distances of 50 $\mu$ m, 75 $\mu$ m and 30 $\mu$ m for CSF1R+  
741 protumorigenic macrophages, endothelial/pericyte network and proliferating tumor cells,  
742 respectively. Each cluster is depicted with a randomized color; clusters were merged and share  
743 one color if present within the maximum distance range. Individual (non-clustering) cells are  
744 shown as smaller light gray points.

745 (F) Palbociclib model of response presented as line diagram and site of intervention using  
746 immunotherapy depicted in red.



747 (G) Tumor burden measurement of mice bearing EMT6 tumors after systemic treatment using  
748 drugs as color-coded in the graph. Shown is mean  $\pm$  s.e.; n=8 to 10 tumors per group.  
749 Significance was calculated using an independent two-sample two-tailed t-test with equal  
750 variance.

751  
752 Figure 3. Local TME changes induced by Venetoclax and whole animal studies testing the  
753 combination treatment efficacy with the predicted anti-CD40 immunotherapy.

754 (A) Quantification of single cell events using individual markers and standard cell types. Bars  
755 are mean  $\pm$  s.e.; n=3 venetoclax reservoirs in two tumors from two different mice. Significance  
756 was calculated by paired sample one tailed t-test. Only significantly enriched cells are presented.  
757 For quantification of all cells, see [Figure S4A](#).

758 (B) Marker co-expression in XY coordinates in the palbociclib (left graph) and venetoclax (mid  
759 and right graph) assay area. Each color-coded dot represents a marker positive cell. Coordinate  
760 [0,0] identifies the drug source. The direction of the drug release is upward.

761 (C) Distance-based cluster analysis of CD11c positive cells as a set of XY coordinates in random  
762 intratumoral (left) and venetoclax assay (right) regions. Clusters are displayed in randomized  
763 colors if at least 10 cells are present within maximum distance range 50 $\mu$ m; individual (non-  
764 clustering) cells are shown as light gray points.

765 (D) Sample composite image of key response markers as color-coded on the left. The arrow  
766 indicates the source and direction of the venetoclax drug release. DHashed boxes define the  
767 magnified area on the right. Here individual markers are overlaid on DNA signal (in white).  
768 Scale bar 100 $\mu$ m; and 30 $\mu$ m for the magnified image.

769 (E) Percentages of Epcam and CD45 (top) and CD11b and MHC-II (bottom) positive cells  
770 within morphologically different CD11c + cells presented as a stack bar graph. The number of  
771 cells (n) in each analysis is presented above the bar. Two to three ROIs from two venetoclax  
772 samples were analyzed and summed per each zone.

773 (F) A model of venetoclax response presented as an influence diagram with sites of intervention  
774 using immunotherapy depicted in red. The relation of morphologically distinct and spatially  
775 separate CD11c DC clusters remains unclear (gray dashed arrows).

776 (G) Survival rates (left) and tumor burden measurements (right) of mice bearing E0771 tumors  
777 after systemic treatment using drugs as color-coded in the line graphs. Shown is mean  $\pm$  s.e.;  
778 n=7-8 mice per group. Significance was calculated by log-rank (Mantel-Cox) and by an unpaired  
779 two-tailed t-test with equal variance for survival and tumor burden rate, respectively. The  
780 treatment dose and schedule are presented schematically. For single treatment effects of anti-PD-  
781 1 and anti-CD40 see [Figure 6H](#).

782

783 Figure 4. Local effects of panobinostat and whole animal studies testing induction of anti-tumor  
784 immunity in mouse mammary carcinoma

785 (A) Quantification of single cell events using individual markers and standard cell types. Bars  
786 are mean  $\pm$  s.e.; n=3 panobinostat reservoirs in two tumors from two different mice. Significance  
787 was calculated by paired sample one tailed t-test. Only significantly enriched cells are presented  
788 here; for quantification of all cell, see [Figure S5A](#).

789 (B) Composite image of the most prominent markers appearing at the panobinostat reservoir as  
790 color-coded on the left. An arrow indicates the source and direction of the drug release. A dashed  
791 box defines the magnified area (right), which shows F4/80 staining in red and DNA signal and  
792 DNA-derived mask (white). Ly6G, MHC-II, aSMA or F4/80 expression was not enriched in  
793 random, drug-remote, intratumoral regions (far right). Scale bar, 100 $\mu$ m.

794 (C) Quantification of PEG normalized average mean CC3 intensity (px value) in the assay  
795 region. The graph shows mean  $\pm$  s.e signal intensity; n=3 wells from 3 tumors from 2-3 mice per  
796 treatment; significance was calculated using an independent two-sample t-test with equal  
797 variance. CSF1R inhibitor (PLX3397 in mouse chow at average 40mg/kg dose) was  
798 administered for seven days before the three-day-long IMD application.

799 (D) CC3 IHC image of a sectioned tissue surrounding the IMD at depicted targeted agents and  
800 chemotherapies. Three replicates are presented for the most potent death-inducing drug,  
801 panobinostat. A computationally processed CC3 signal for the 20% panobinostat image is shown  
802 in the lower right as a binary image.

803 (E) Marker co-expression in XY coordinates. Each dot represents a marker positive cell as color  
804 coded on the bottom. Coordinate [0,0] identifies the drug source. The direction of the drug  
805 release is upwards.

806 (F) Percentage of MHC-II+ neutrophils. Shown is mean  $\pm$  s.e.; n=3 panobinostat reservoirs.

807 (G) Induction of anti-tumor immunity measured in a vaccination study using panobinostat treated  
808 cells and negative control (cells killed by three freeze/thaw cycles). Line graphs show  
809 percentages of mice free from palpable tumors. The P-value was calculated by log-rank (Mantel-  
810 Cox) test. n=7 per each group for E0771 model; and n=4 (control) and n=5 (experimental) for  
811 EMT6 model, respectively.

812 (H) Quantification of intratumoral CD8+ T cell infiltration into ErbB2 $\Delta$ Ex16 spontaneously  
813 growing tumors 7 days after systemic panobinostat treatment. The central mark indicates median  
814 and the bottom and top edges of the box indicate 25th and 75th percentiles, respectively. Green  
815 diamonds show the means. n=8 randomly selected ROIs using four tumors from two to three  
816 mice per group. A two-color composite image of Epcam and CD8 staining (top right) and a  
817 processed image showing intraepithelial CD8+ cells depicted in white (bottom right). Scale bar,  
818 100 $\mu$ m.

819 (I) Survival rates (left; 100% to 0%) and tumor burden measurements (right) of E0771 tumor  
820 bearing mice treated with depicted treatments as color-coded in the line graphs. Mean  $\pm$  s.e. per  
821 timepoint are presented; n=8 to 12 mice per group. Significance was calculated by log-rank  
822 (Mantel-Cox) and by unpaired two-tailed t-test with equal variance for survival and tumor  
823 burden rate, respectively. The treatment dose and schedules are presented.

824

825 Figure 5. Spatial cell analyses of immunogenic cell death biomarkers and associated resistance  
826 mechanisms

827 (A) Profile plot of the relative abundance of standard cell types and individual biomarkers with  
828 distance from the well and overlay with the assay zones (colored vertical lines).

829 (B) A schematic presentation of cell phenotype separation into zones with distance from the  
830 panobinostat reservoir.

831 (C) 3D composite image showing biomarkers associated with immunogenic cell death and  
832  $\alpha$ SMA barrier limiting the propagation of these biomarkers presented in green. The white arrow  
833 indicates the source and direction of the panobinostat release. A profile plot of relative cell  
834 abundance at the depicted area (dashed) is presented top right.

835 (D) Distance-based clustering of Sox9, CD45, CD11c and galectin-3 positive cells (top) and PD-  
836 L1 and galectin-3 positive cells (bottom) in XY coordinates with overlay (black line) on Sox9  
837 and PD-L1 cluster border, respectively. Individual clusters were identified by a minimum 10  
838 cells within a maximum 50 $\mu$ m distance for all but PD-L1 marker which clustered with a  
839 maximum distance set to 150 $\mu$ m.

840 (E) Percentages of cells expressing biomarkers of ICD on standard cell types presented in form  
841 of a stack bar graph. The number of cells quantified is presented above the bar.

842 (F) A composite image showing mutually exclusive staining of Sox9 and CC3; and co-  
843 expression of Sox9 with galectin-3 (bottom left image). Scale bar; 100 $\mu$ m.

844 (G, H) Number of Sox9+ pairwise distances with other marker positive cells presented in form of  
845 a histogram (G) and bar graph showing average proportion of Sox9 pairwise distances which  
846 were less than 50 $\mu$ m (H). n=4 ROIs of 175 $\mu$ m diameter in the border assay zone. Significance  
847 was determined by paired two tailed t test.

848 (I) Line diagram of a proposed panobinostat mechanism of action determined by MIMA and  
849 sites of intervention (depicted in red). Phenotypes that remain to be tested/validated are presented  
850 in gray color. All experiments were performed using the MMTV-PyMT mice with late stage  
851 spontaneously growing tumors and a three-day device implant.

852

853 Figure 6. Efficacy of the triple combination of panobinostat, venetoclax and anti-CD40  
854 immunotherapy in mammary carcinoma and rationale for the combination.

855 (A) Effects of drug combinations on CC3 and CD45 expression as measured by IHC at three  
856 days of exposure. Graph shows mean  $\pm$  s.e normalized signal intensity. n=3-10 wells from at  
857 least 3 tumors from 2-3 MMTV-PyMT mice with spontaneous tumors per treatment; significance  
858 was calculated by independent two-sample t-test with equal variance.

859 (B) Macroscopic view of a hematoxylin-stained tumor tissue section showing the intersection  
860 between two drugs. Drug release sites are shown by black arrows. The device was implanted for  
861 eight days in MMTV-PyMT tumor induced by orthotopic implant into mammary fat pad of  
862 syngeneic mice. Note the tumor cleared region lacking nucleated cells at the intersection of  
863 panobinostat and venetoclax.

864 (C) Quantification of single cell events using individual markers and marker combinations for  
865 standard cell types. Bars are mean  $\pm$  s.e.; n=2 reservoirs at the intersection of panobinsostat and  
866 venetoclax. Significance was calculated by paired sample one tailed t-test. Only significantly  
867 enriched cells are presented. For quantification of all cells, see [Figure S9C](#).  
868 (D) A five-color 3D composite image showing key response markers induced at the intersection  
869 of panobinostat and venetoclax. White arrows indicate the source and direction of the drug  
870 release. CD11c dendritic cell marker is presented in high view. Scale bar; shown.  
871 (E, F) Limited infiltration of CD4+, CD8+ T cells and CD45R+ B cells localized to MHC-II  
872 antigen presenting CD11c+ dendritic cells lacking CD11b pan-myeloid marker expression (E)  
873 and quantification of their Ki67 proliferative and Foxp3 regulatory potential (F).  
874 (G, H, I) Survival rate (left and bottom; 100% to 0%) and tumor burden measurements (right and  
875 top) over time in E0771 (G), EMT6 (H) orthotopically induced tumor bearing mice and MMTV-  
876 PyMT mice with spontaneously growing tumors (I). C, control; P, panobinostat, PV,  
877 panobinostat-venetoclax combination. Treatment schedules and doses match those in [Figure 3F](#)  
878 and [4H](#) except the doses for panobinostat and venetoclax were decreased to 11.5mg/kg and  
879 18mg/kg, respectively, when drugs were combined. For survival rate, P-value was calculated by  
880 log-rank (Mantel-Cox). For tumor burden, line graphs are mean  $\pm$  s.e. per timepoint; n= 8-12  
881 mice, and 6-12 tumors and 6-8 mice per group in (G), (H) and (I), respectively. Significance was  
882 calculated by unpaired two-tailed t-test with equal variance.  
883 (J) Hypothetical model of response for panobinostat/venetoclax/anti-CD40 triple combination  
884 treatment efficacy in breast cancers. Briefly, the tumor is composed of bulk tumor and cancer  
885 stem cells (i). Panobinostat induces immunogenic cell death of the bulk tumor while cancer stem  
886 cells remain resistant in the tumor microenvironment (ii). Venetoclax induces recruitment of  
887 dendritic cells in close proximity to cancer stem cells (iii). We hypothesize that if CD40 ligation  
888 induces licensing of dendritic cells which captured and processed antigen from neighboring  
889 CSCs, the triple combination potentiates CSC-specific anti-tumor immunity leading to complete  
890 tumor rejection (iv).

891

## 892 **STAR METHODS**

## 893 **CONTACT FOR REAGENT AND RESOURCE SHARING**

894 Further information and requests for resources and reagents should be directed to and will be  
895 fulfilled by the lead contact Joe W. Gray ([grayjo@ohsu.edu](mailto:grayjo@ohsu.edu)).

896

## 897 **EXPERIMENTAL MODELS AND SUBJECT DETAILS**

### 898 **Murine Models**

899 Mice were purchased from The Jackson Laboratory. All animal studies were conducted in  
900 accordance with protocols approved by Institutional Animal Care and Use Committee (IACUC)  
901 at OHSU (protocol number: IP00000956). All mice were bred and housed under specific  
902 pathogen free conditions under a standard 12h light / 12h dark cycle. C57LB/6, BALB/c, and  
903 FVB/N mice were purchased from the Jackson Laboratory. MMTV-PyMT were from Dr. Lisa  
904 Coussens and purchased from the Jackson Laboratory. Virgin female mice of 8-24 weeks of age  
905 were used for all experiments.

906

### 907 **Cell lines**

908 EMT6 (mouse breast cancer) cells were purchased from American Type Culture Collection and  
909 were maintained in Waymouth's medium with 10% FBS, and 2mM L-glutamine. E0771 (mouse  
910 breast cancer) cells were purchased from CH3 BioSystems® and were cultured in RPMI-1640  
911 with 10% FBS and 10mM HEPES. Both cell lines were pathogen tested and were grown at 5%  
912 CO<sub>2</sub> and 37C.

913

## 914 **METHOD DETAILS**

### 915 **Experimental design**

916 The objective of the studies in figures is to show how intact tumor microenvironment responds to  
917 local stimulus of drug release and to test whether this response was significantly different from  
918 the baseline tumor microenvironmental state in tumor region distant from the drug site. The  
919 number of independent biological replicates of each experiment (n) performed are given in the  
920 figure legends. Spatial systems analyses were designed to quantitatively define directional spatial  
921 cell dependencies and cause consequence association with distance from the reservoir translating  
922 to models of drug response. Within these models we aimed to identify therapeutic vulnerabilities  
923 to predict rational immune or TME modulating treatment combinations and their optimal  
924 schedule/sequencing.

925

## 926 **Microdevice implantation studies and sample collection**

927 Nanodose drug delivery devices were manufactured and implanted as described previously in  
928 (Jonas et al., 2015). Briefly, cylindrical microdevices 5.5mm in length and 750 $\mu$ m in diameter  
929 were manufactured from medical-grade Delrin acetyl resin blocks (DuPont) by micromachining  
930 (CNC Micromachining Center) with 18 reservoirs 200 $\mu$ m (diameter) x 250 $\mu$ m (depth) on the  
931 outer surface. Reservoirs were packed with drugs mixed with Polyethylene glycol (PEG, MW  
932 1450, Polysciences) polymer at the concentrations indicated in Table S1. Recommended  
933 systemic dose in cancer patients was derived from the <https://rxlist.com> web page to June 2017.  
934 Systemic doses ranging between 0-1mg/kg, 1-2mg/kg, 2-4mg/kg, >4mg/kg translate to 20%,  
935 25%, 30% and 40% of drug concentration in PEG, respectively, when released from the  
936 nanowell. The calibration was determined previously using mass spectrometry measurements  
937 (Jonas et al., 2015). Pure PEG was used in control conditions. Implanting multiple devices per  
938 tumor and/or multifocal animal model can increase the throughput up to 50-70 times as  
939 compared to conventional systemic treatment studies. When two drugs were loaded into one  
940 reservoir, they were at approximately 1:1 ratio. The combination partner was loaded on the  
941 bottom of the well; panobinostat was released first. Microdevices were implanted for three days  
942 in MMTV-PyMT and ErbB2 $\Delta$ Ex16 mice with late stage spontaneously growing tumors in all  
943 experiments but those presented in [Figure 6](#) and [S9](#). Tumor size was between 1.2 - 1.5cm in the  
944 longest dimension at the time of implant. Tumors were excised at three days after device  
945 implantation unless otherwise stated, fixed for 48h in 10% formalin or 4% paraformaldehyde,  
946 then perfused with paraffin. Specimen were sectioned using a standard microtome and 5 $\mu$ m  
947 tissue sections were collected from each reservoir. Dry FFPE tissues were baked in a 65`C oven  
948 for 30mins. Following deparaffinization with xylene and rehydration in serially graded alcohol to  
949 distilled water, slides were subjected to endogenous peroxidase blocking in fresh 3% H<sub>2</sub>O<sub>2</sub> for 10  
950 minutes at RT. Sections were then stained by multiplex immunohistochemistry and/or cyclic  
951 immunofluorescence (see also [Figure S1B, C](#)).

952

## 953 **Cyclic Immunofluorescence**

954 Before iterative cycles of (i) staining, (ii) whole slide scanning and (iii) fluorophore bleaching,  
955 the slides were subjected to heat-mediated antigen retrieval immersed in citrate buffer (pH 5.5,



956 HK0809K, BioGenex Laboratories Citra Plus Antigen Retrieval), then in Tris/EDTA buffer (pH  
957 9.0, S2368, Dako Target Retrieval Solution) using Cuisinart Electric Pressure Cooker (CPC-  
958 600N1) for total of 35 to 40 minutes. Protein blocking was performed for 30 minutes RT with  
959 10% normal goat serum (S-1000, Vector Lab) and 1% bovine serum albumin (BP1600-100) in  
960 1xPBS. (i) Slides were incubated with primary antibody (concentrations defined in Table S2) for  
961 2 hours at RT while being protected from light in a dark humid chamber. All washing steps were  
962 performed for 3 x 2-5 minutes in 1xPBS while agitating. Slides were mounted with SlowFade  
963 Gold antifade mountant with DAPI (S36938) using a Corning Cover Glass (2980-245). (ii)  
964 Images were acquired using Zeiss Axio Scan.Z1 Digital Slide Scanner (Carl Zeiss Microscopy)  
965 at 20x magnification after which the coverslips were gently removed in 1xPBS while agitating.  
966 (iii) Fluorophores were chemically inactivated using a 3% H<sub>2</sub>O<sub>2</sub> and 20mM NaOH in 1xPBS for  
967 30 minutes at RT while being continuously illuminated. The fluorophore inactivation was  
968 repeated twice with a short, 10-minute, 1xPBS wash in between. Efficacy of bleaching was  
969 imaged before antibody incubation (baseline autofluorescence) and every third to fourth cycle in  
970 average. After protein blocking, samples were subjected to the next round of staining. Single cell  
971 feature extraction was not applied to evaluate sections stained by cyclic immunofluorescence.

972

### 973 **Multiplex Immunohistochemistry**

974 Before iterative cycles of (i) staining, (ii) whole slide scanning and (iii) and heat and chemical  
975 stripping of antibodies and chromogen, the slides were subjected to staining with F4/80 and  
976 CSF1R antibodies (cycle zero, no antigen retrieval, [Table S3](#)) and hematoxylin staining (S3301,  
977 Dako) for 1-5mins followed by whole slide scanning. Slides were then subjected to the first heat-  
978 mediated antigen retrieval in 1x pH 5.5-6 citrate buffer (Biogenex Laboratories, HK0809K) for  
979 90 seconds in a low power microwave and 16 minutes in a steamer followed by protein blocking  
980 with 10% normal goat serum (S-1000, Vector Lab) and 1% bovine serum albumin (BP1600-100)  
981 in 1xPBS for 30 minutes RT. (i) Slides were incubated with primary antibodies (concentrations  
982 defined in [Table S3](#)) for 1 hour at RT or 16-17 hours at 4 degrees Celsius while being protected  
983 from light in a dark humid chamber. Signal was visualized with either anti-rabbit or anti-rat  
984 Histofine Simple Stain MAX PO horseradish peroxidase (HRP) conjugated polymer (Nichirei  
985 Biosciences) followed by peroxidase detection with 3-amino-9-ethylcarbazole (AEC). Two or  
986 three drops of HRP polymer were used for up to nickel-size or whole slide tissue sample,

987 respectively. Timing of AEC development was determined by visual inspection of positive  
988 control tissue (Figure S1 D-F) for each antibody. All washing steps were performed for 3 x 5-10  
989 minutes in 1xPBS while agitating. Slides were mounted with a filtered 1xPBS with 0.075%  
990 Tween20 (BP337100) using a Signature Series Cover Glass cover glass (Thermo Scientific,  
991 12460S). (ii) Images were acquired using the Aperio ImageScope AT (Leica Biosystems) at 20x  
992 magnification after which the coverslips were gently removed in 1xPBS while agitating. (iii)  
993 Within one cycle, removal of AEC and HRP inactivation was accomplished by incubating the  
994 slides in 0.6% fresh H<sub>2</sub>O<sub>2</sub> in methanol for 15 minutes; AEC removal and stripping of antibodies  
995 was accomplished by Ethanol gradient incubation and heat-mediated antigen retrieval such as  
996 described above between cycles (see also Figure S1B) (Banik et al., 2020; Tsujikawa et al.,  
997 2017). After washing and protein blocking, samples were subjected to the next round of staining.  
998

### 999 **Image processing and feature extraction of mIHC images**

1000 The iteratively digitized images were co-registered using Matlab (The MathWorks, Inc., Natic,  
1001 MA, version 2019b) utilizing the detectSURFFeatures algorithm from the Computer Vision  
1002 Toolbox. The imperfectly registered images were additionally processed using the Linear Stack  
1003 Alignment with SIFT plugin (Fiji) so that cell features overlap down to a single pixel level.  
1004 Hematoxylin-stained images were color deconvoluted for single cell nuclear segmentation to  
1005 generate a binary mask using watershed function and standard image processing steps (noise  
1006 removal, erosion, dilation; Fiji) (Schneider et al., 2012). AEC chromogenic signal was extracted  
1007 using the NIH plugin RGB\_to\_CMYK to separate AEC signal into the yellow channel for  
1008 improved sensitivity of IHC evaluation (Banik et al., 2020; Pham et al., 2007). Gray scale images  
1009 of all proteins and the binary mask were imported to CellProfiler (version 3.1.8, Broad Institute)  
1010 (Carpenter et al., 2006) to quantify single cell signal mean intensity as defined by mask which  
1011 was scaled to a range 0-1. IdentifyPrimaryObjects module was used to identify nuclei from  
1012 mask; MeasureObjectIntensity module measured mean intensity for each object for each protein.  
1013 The mean signal intensity per cell output was imported to FCS Express 6 and 7 Image Cytometry  
1014 Software (DeNovo Software) to perform multidimensionality reduction to classify “cell  
1015 standards”. Gating strategies and hierarchical cell classification is presented in Figure 1E and  
1016 Figures S2E and F. Polygonal gates moving around central vertex without changing the polygon  
1017 shapes was used to obtain quantitatively reproducible multiplex data, batch to batch, independent

1018 of the condition measured. Positive control tissues were used to help to define single parameter  
1019 threshold for positivity by manual gating. Total of 3000-5000 cells were analyzed for feature  
1020 extraction in the assay area located above the drug releasing site with  $\pm 300$  total cells for paired,  
1021 experimental vs control, region. Minimum population proportion within 5% margin of error and  
1022 95% confidence level was set to 0.75% (represents 12 cells) to discriminate noise from specific  
1023 cell enrichment induced by e.g. increased protein expression or cell recruitment into the assay  
1024 region. Experimental condition of the assay area was compared to random control intratumoral  
1025 region located perpendicular and/or far from the drug-releasing reservoir. To obtain greater  
1026 control over confounding variables, paired sample one tailed t-tests were used to determine  
1027 enrichment of induced TME states. Percentage of positivity and significance was presented in  
1028 form of a heatmap or bar graphs. Quality of the single cell data was ensured by excluding  
1029 deformed (folded), lost or unevenly stained tissue (border effects). The assay area was  
1030 determined by the first 3000-5000 cells above the well excluding these deformed regions. Single  
1031 cell data from FCS Express was extracted in data grid to Matlab for downstream spatial systems  
1032 analyses. In computed images, neutrophils are presented independent of the Epcam $\pm$  status.

1033

### 1034 **Spatial Systems Analyses**

1035 Distance based cluster function finds clusters in a set of spatial points expressed in XY space  
1036 (adapted and modified from Yann Marcon; Matlab October 2019). The clustering is based on  
1037 Euclidean distance between the points (cells). The function does not require the number of  
1038 clusters to be known beforehand. Each cell clusters with the closest neighboring cell if distance  
1039 between the two cells is shorter than the defined threshold. Minimal number of cells per cluster  
1040 are defined by user. The function outputs non-clustering cells in gray color while each cluster  
1041 meeting the defined parameters (minimal number of cells within maximum distance range) are  
1042 presented in randomized colors. Clusters within the maximum defined distance merge and share  
1043 one color. Number of clusters and total coverage in the assay area was calculated using distinct  
1044 cluster sizes (defined by minimal number of cells within maximum distance range, [Figure S3F](#))  
1045 for control PEG and palbociclib which identified that cells cluster in response to treatment if  
1046 minimum 10 cells are present within maximum distance range 30-75 $\mu$ m. Cluster parametrization  
1047 using as few as 5 cells and distances as large as 100 $\mu$ m resulted in treatment non-specific cluster  
1048 formation in PEG negative control. Treatment specific cluster formation with cluster definition

1049 of minimum 10 cells within 50 $\mu$ m distance was generalizable to all marker and standard cell  
1050 types which was confirmed in panobinostat condition by comparing assay area and distal region  
1051 side by side in one field of view (Figure S6G). This treatment specific cluster parametrization  
1052 was applied in downstream analytics to identify hotspots/zones of interest (e.g. *proximal*, *border*,  
1053 *distal*, network adjacent, CD11c+ DC clusters) in an objective, biology driven, manner.

1054 For the relative abundance profile plot, marker positive cells and the standard cell types were  
1055 extracted to XY coordinate space, signal was blurred using Gaussian Blur filter and relative  
1056 abundance of positive cells was displayed with distance from the well in a profile plot as outlines  
1057 in Figures S3B and S6A. A moving average filter with 50 $\mu$ m; and 100 $\mu$ m window size  
1058 (movmean function; Matlab) was additionally applied to smoothen the feature signal for  
1059 palbociclib and panobinostat condition, respectively. Signal in the profile plots was not scaled.

1060 Inside the hotspot, spatial (geographical) interactions between marker positive cells were  
1061 determined by proximity measurements in local microculture by using the pdist2 function in  
1062 Matlab (MathWorks, Inc., Natic, MA, version 2019b) which returns the distance of each pair of  
1063 observations (positive cells) in X and Y using metric specified by Euclidean distance. Random  
1064 circular regions of 175 $\mu$ m diameter (defined by Figure S6H) were selected in the border, cancer  
1065 stem cell, zone of the panobinostat assay area and Euclidean distance was measured between  
1066 Sox9+ and other marker positive cells. The number of distances was presented in form of a  
1067 histogram. To quantify spatially interrelated phenomenon, proportions of distances lower than  
1068 50 $\mu$ m (as defined by distance-based cluster analyses) was compared between different cell pairs  
1069 (e.g. Sox9+/Ly6G+ vs Sox9+/CD11c+).

1070 Extended hierarchical cell classification was applied to characterize the significantly enriched  
1071 cell phenotypes forming zones of interest which were outside the standard cell type classification  
1072 (e.g less differentiated macrophages or phagocytic DCs). Probe combination, number of cells  
1073 analyzed within number of clusters are defined in the figures and figure legends.

1074 2D composite and 3D composite images were presented by using Fiji (Schneider et al., 2012)  
1075 and QiTissue Quantitative Imaging System (<http://www.qi-tissue.com>).

1076 The spatial systems analyses were used to identify drug models of response (presented as line  
1077 diagrams) and the identified therapeutic vulnerabilities were tested in whole animal studies.

1078

1079 **Whole animal treatment studies**

1080 MMTV-PyMT transgenic mice that were 80 days old were randomized and included in the study  
1081 when their total tumor burden was between 150-550mm<sup>3</sup> (treatment initiation). For the  
1082 orthotopically induced tumor models of mammary carcinoma, EMT6 (0.5 x 10<sup>6</sup> in 1xPBS per  
1083 site), E0771 (0.5 x 10<sup>6</sup> in Corning matrigel per site) and primary tumor derived LPA3 (0.8 x 10<sup>5</sup>  
1084 in Corning matrigel per site) cells were injected into the #4 mammary fat pad of female virgin  
1085 C57LB/6, BALB/c, and FVB/N mice, respectively. One tumor was induced in the E0771, LPA3  
1086 models and two tumors were induced in the EMT6 model. Caliper measurements were used to  
1087 calculate the tumor volumes using formula length x width<sup>2</sup> / 2. Treatments were initiated when  
1088 total tumor burden was between 60-150mm<sup>3</sup> or as defined in the figure legend (Figure S5E, F).  
1089 For all models, the endpoint was determined by tumor volume above 2000mm<sup>3</sup> in two  
1090 consecutive measurements or one measurement above 2200mm<sup>3</sup>. Treatments were administered  
1091 by intraperitoneal injection. Dose, schedule and duration are indicated in the respective figures  
1092 and figure legends. Treatment schedule was estimated depending on the location of the targetable  
1093 cell phenotype in proximity to the well or more distal from the drug source. E.g. cells in the  
1094 *immediate proximity* to the drug well at 3 days of exposure were likely recruited first to the drug  
1095 assay area thus early targeting (pre-treatment) of these cells is preferred. Inversely, cells located  
1096 in *distal* regions at late timepoints (e.g. day 8) should be targeted by posttreatment approach. See  
1097 also Figure S8. Diluent and IgG2a isotype control (BioXCell) concentrations were equivalent to  
1098 the highest dose of the respective drug used in each experiment.

1099 The mice were monitored daily to determine any possible effects on the general condition of the  
1100 animals using parameters as established by (Morton and Griffiths, 1985). The guidelines for  
1101 pain, discomfort and distress recognition were used to evaluate weight loss, appearance,  
1102 spontaneous behavior, behavior in response to manipulation and vital signs. Specifically, general  
1103 appearance (dehydration, missing anatomy, abnormal posture, swelling, tissue masses, prolapse)  
1104 skin and fur appearance (discoloration, urine stain, pallor, redness, cyanosis, icterus, wound,  
1105 sore, abscess, ulcer, alopecia, ruffled fur), eyes (exophthalmos, microphthalmia, ptosis, reddened  
1106 eye, lacrimation, discharge, opacity), feces (discoloration, blood in the feces, softness/diarrhea),  
1107 locomotor (hyperactivity, coma, ataxia, circling) were monitored to determine loss of body  
1108 condition (BC) score, namely: BC 1 (emaciated) score applied when skeletal structure was

1109 extremely prominent with little or no flesh/muscle mass and vertebrae was distinctly segmented;  
1110 BC 2 (under-conditioned) score applied when segmentation of vertebrate column was evident,  
1111 dorsal pelvic bones were readily palpable and muscle mass was reduced; BC 3 (well-  
1112 conditioned) applies when vertebrae and dorsal pelvis were not prominent/visible, and were  
1113 palpable with slight pressure. Loss of BC was also considered when anorexia (lack or loss of  
1114 appetite) or failure to drink; debilitating diarrhea, dehydration/reduced skin turgor; edema,  
1115 sizable abdominal enlargement or ascites, progressive dermatitis, rough hair coat/unkept  
1116 appearance, hunched posture, lethargy, loss of righting reflex, neurological signs or bleeding  
1117 from any orifice appeared in treated mice. Majority of treated groups were well-conditioned (BC  
1118 score 3); less than 20% of mice in each group experienced mild diarrhea for up to 2 days once  
1119 during the course of treatment (typically post first or second therapy administration). Mice  
1120 receiving palbociclib monotherapy were under-conditioned (BC score 2) starting from day 3 till  
1121 the end of the treatment. Two out of eight mice in the MMTV-PyMT model died within 1-3 days  
1122 after first injection of  $\alpha$ CD40 immunotherapy when administered as single agent. Surviving mice  
1123 receiving Venetoclax/ $\alpha$ CD40 combination experienced fur graying to different degree starting  
1124 approximately four weeks post treatment. No signs of pain, discomfort or distress were observed  
1125 in the surviving mice. Emaciated (BC score 1), over-conditioned (BC score 4) nor obese (BC  
1126 score 5) were observed in our studies. LPA-3 mice become obese with tumor development but  
1127 this sign was independent of administered treatment (treatment naïve).

1128 To measure CD8<sup>+</sup> T cell infiltration inside the tumor bed, ErbB2 $\Delta$ Ex16 mice with spontaneously  
1129 growing tumors were intraperitoneally injected with panobinostat (15mg/mg) on day 0, 2 and 4.  
1130 Tumors were extracted at day 7, were FFPE processed and were stained for Epcam and CD8 to  
1131 compare rate of intratumoral (Epcam<sup>+</sup>) vs stromal (Epcam<sup>-</sup>) CD8<sup>+</sup> T cells in panobinostat  
1132 treated vs control (diluent) treated tumors.

1133

### 1134 **Vaccination study**

1135 EMT6 and E0771 cells in tissue culture were treated with a soluble drug panobinostat at 5 $\mu$ M  
1136 concentration when they would reach 60-70% confluency. After two days the cells (80-90%  
1137 death rate) were harvested and were injected subcutaneously (total 2-3 x 10<sup>6</sup> cells) into lower left  
1138 flank of BALB/c and C57Bl6 mice, respectively. Cells freeze-thawed three times served as



1139 negative control for non-immunogenic form of cell death. After 7-8 days, the mice were re-  
1140 inoculated by injecting living cells orthotopically into one #4 mammary fat pad (total  $0.5 \times 10^6$   
1141 cells) and tumor appearance was monitored by minimal tumor size approximately 5mm and  
1142 3.5mm in the longest dimension for E0771 and EMT6 model, respectively (palpable tumors). We  
1143 note the E0771 tumors after re-challenge appeared at the primary subcutaneous site and no  
1144 tumors were developed in the orthotopic site.

1145

#### 1146 **Statistical analysis**

1147 All data are combined from two to three independent experiments, unless specifically noted. To  
1148 accomplish randomization for systemic mouse experiments, animals were sorted by a blinded  
1149 investigator and then groups were assigned. Each group was checked post-hoc to verify no  
1150 statistical significance in average starting tumor size. There was no sample-size estimation of in  
1151 standard drug treatment experiments. Data are shown as mean  $\pm$  SEM, unless otherwise noted.  
1152 For tumor growth rate, significance was calculated by unpaired two-tailed t-test with equal  
1153 variance. For survival and tumor free analyses, Kaplan-Meier curves were generated to  
1154 demonstrate time to event and log-rank (Mantel-Cox) test was used to evaluate statistical  
1155 significance.

1156

#### 1157 **SUPPLEMENTAL INFORMATION**

##### 1158 **SUPPLEMENTARY TABLE LEGENDS**

1159 Table S1. Drug list and drug concentration calibration used in the MIMA system; Related to  
1160 Figure 1.

1161 Table S2. Antibody order, catalog and concentration used in mouse multiplex IHC; Related to  
1162 Figure 1.

1163 Table S3. Antibody order, catalog and concentration used in mouse cycIF; Related to Figure 1.

1164 Table S4. Rationale to select effective immunotherapy or non-immune stroma modulating  
1165 combination partner based on the TME signature induced by primary treatment.

1166 Table S5. Comparison of systemic drug dosing in our and the previously reported studies.

1167



## 1168 SUPPLEMENTARY FIGURE LEGENDS

1169 Figure S1. Components of the MIMA system and mIHC/cycIF anti-mouse antibody validation;  
1170 Related to Figure 1.

1171 (A) Dosing for individual drugs was calibrated using mass spectrometry measurements  
1172 comparing concentration of the same drug in situ after systemic treatment versus after local  
1173 delivery (adapted and modified from (Jonas et al., 2015)). Sample images of intratumoral  
1174 doxorubicin distribution at 6 hours after systemic treatment (top left image) and PEG-formulated  
1175 doxorubicin transport from device at 20 hours after release (bottom left image). Signal mean  
1176 intensity was extracted (n=3 each) and plotted using a moving average window filter to  
1177 smoothen the signal (right). For detailed information on the pharmacokinetics of intratumoral  
1178 drug release from the IMD see (Jonas et al., 2015).

1179 (B,C) Schematic overview of multiplex immunohistochemistry (mIHC; B) and cyclic  
1180 immunofluorescence (cycIF, C). (C) mIHC utilizes indirect staining, iterative deposition of  
1181 chromogen/enzyme pairs and brightfield microscopy to image the target signal. The chromogen  
1182 used in this study is called 3-amino-9-ethylcarbazol (AEC) and it produces a red precipitate  
1183 when visualized with polymer-based peroxidase conjugated to a secondary antibody (anti-rabbit  
1184 or anti-rat; Histofine® Simple Stain). AEC is susceptible to organic solvents which is used to  
1185 remove the red signal and detect two target proteins in one cycle. Primary antibody mixture is  
1186 stripped in heated low pH citrate buffer is every cycle after scanning in order to further multiplex  
1187 the staining on a single FFPE slide. Antibodies raised in rabbit and rat hosts alternate to prevent  
1188 crosstalk between cycles. Hematoxylin counterstains nuclei to allow cell count and downstream  
1189 image analysis (Figure S2). (C) cycIF utilizes fluorophores as reporters via direct labeling. Four  
1190 to five non-overlapping fluorescent signals can be detected in a single cycle against dark  
1191 background. DAPI signal is used to visualize nuclei for cell count. Progressive staining is  
1192 enabled by inactivating the fluorophore using base hydrogen peroxide mixture and heat.  
1193 Antibody specificity is cross-validated by performing chromogenic mIHC on the adjacent tissue  
1194 section.

1195 (D) List of biomarkers (left column) and positive control tissues used for antibody validation and  
1196 signal thresholding.

1197 (E) Hematoxylin staining of an FFPE section containing all positive control organs from an adult  
1198 wild type FVB/N female mouse: thymus (Th), heart (H), lungs (Lu), liver (Li), mammary gland

1199 (MG), lymph node (LN), spleen (Sp), pancreas (P), adrenal gland (A), kidney (K), fat (F), uterine  
1200 horn (UH). Tumor (T) with implanted device and attached skin (Sk) was embedded into the same  
1201 FFPE block.

1202 (F) Representative images of individual biomarkers using mIHC (red signal in bright field  
1203 images) or cycIF (magenta signal in fluorescent images unless otherwise stated). Biomarker  
1204 name is located on the top left; while the name of the organ is located on the top right side of  
1205 each image, respectively. Some positive signal can be detected in a macroscopic view (Ki67,  
1206 CD31, CD4, CD45, NF-KB, desmin, arginase-1, ICAM-1). Section stained without primary  
1207 antibody served as negative control in the mIHC procedure (last image). Green fluorescent  
1208 channel served to detect autofluorescence and to separate background from specific staining in  
1209 the cycIF procedure. Only antibodies with very strong specific staining such as aSMA (marked  
1210 with a star \*), were used in conjugation with Alexa fluor-488. Scale bars; shown.

1211

1212 Figure S2. Analytical design to quantify single cell events in MIMA; Related to Figure 1.

1213 (A) The baseline discovery readout panel for MIMA is composed of a total of 13 probes we  
1214 identified to be the minimal and satisfactory requirement to capture the major TME states to  
1215 predict drug-induced changes which are actionable (see also [Table S4](#)).

1216 (B) Tissue section of an early MMTV-PyMT mammary carcinoma and adjacent lymph node  
1217 (brightfield image of PyMT, CD45,  $\alpha$ SMA, CD31 shown) was used to establish hierarchical  
1218 gating strategies in image cytometry (in E) to define “standard cell types”. This for two reasons:  
1219 presence of a lymph node in the same section offers the possibility to utilize mutual exclusivity  
1220 (top) for reproducible signal thresholding. Second, early tumors provide with the opportunity to  
1221 evaluate relatively broader range of phenotypically distinct cell types as compared to late-stage  
1222 tumors (quantification, bottom). Number of cells analyzed is shown; data is derived from one  
1223 and two tumors for early and late tumor sample, respectively.

1224 (C) Image processing for image cytometry analysis is composed of the following steps, briefly:  
1225 hematoxylin staining (1) is color-deconvoluted and the signal is segmented using ImageJ  
1226 watershed function (Schneider et al., 2012) to generate mask (2). Red AEC signal (3) mean  
1227 intensity in a selection as defined by mask (4) is calculated for each cell (5).

1228 (D) Pixel intensity measurements and shape size measurements are used to gate cells for positive  
1229 marker expression (CD45 in this case). FCS Express 6 and 7 Image Cytometry Software (De

1230 Novo Software), was used to obtain accurate thresholding using the cell population shape and  
1231 dimensions. Correct gating is also monitored through visual inspection (second column).  
1232 (E) Density plot of dimensionality reduction in hierarchical clustering to define “standard cell  
1233 types” (middle column). The shape of the gates was designed to obtain quantitatively  
1234 reproducible multiplex data, batch to batch, independent of the condition measured: early tumor  
1235 and lymph node (top row), mammary gland and lymph node (middle row) and panobinostat  
1236 implanted tumor sample two days post exposure (bottom row) are shown for comparison. For  
1237 probes other than “standard cell types” (pleiotropic/undefined biology), threshold for positivity  
1238 was determined manually using FCS Express 6 and 7 Image Cytometry software and positive  
1239 control tissue (Figure S1D-F) (right). Sample pictures for marker positive cells; left.

1240

1241 Figure S3. Locally induced tumor-TME changes at the palbociclib delivery sites; Related to  
1242 Figure 2

1243 (A) Quantification of single cell events using individual markers and marker combinations  
1244 (including standard cell types). Bars are mean  $\pm$  s.e.; n=3 palbociclib reservoirs in three tumors  
1245 from three different MMTV-PyMT mice with late stage (d93-d100) spontaneously growing  
1246 tumors implanted with IMD for three days. Significance was calculated by paired sample one  
1247 tailed *t*-test.

1248 (B) Presentation of key response cell types (biomarker combination displayed) in XY space.  
1249 Black arrow shows the drug releasing site; direction of the release is from the bottom to the top.  
1250 The black line depicts region analyzed to quantify relative abundance of cell types with distance  
1251 from the well in Figure 2D.

1252 (C) Percentage of MHC-II+ protumorigenic (M2) macrophages as defined by standard cell types.  
1253 Stack bars are mean  $\pm$  s.e.; n=3 palbociclib reservoirs in three tumors from three different mice.

1254 (D) Gray scale single channel images of depicted markers at the palbociclib reservoir (left) and  
1255 merge composite images with or without overlay on the nuclei defined mask (top right and  
1256 bottom right, respectively). Dashed line stratifies the “immediate pool” zone for Figure 2C. Scale  
1257 bar, 100 $\mu$ m.

1258 (E) Distance based clustering of CSF1R, CD31 and Ki67 positive cells as a set of XY  
1259 coordinates. Coordinate [0,0] identifies the drug source. Direction of the drug release is always  
1260 from bottom to the top. Individual clusters were identified by minimum 10 cells within

1261 maximum distance 50 $\mu$ m, 75 $\mu$ m and 30 $\mu$ m for CSF1R+, CD31+ and Ki67+, respectively.  
1262 Clusters were merged together if present within the maximum distance range. Each cluster is  
1263 depicted with a different randomized color; individual (non-clustering) cells are shown as light  
1264 gray points. Function was adapted and modified from Yann Marcon (Matlab, Oct 2019). Note  
1265 larger cluster formation when analyzing individual markers as compared to standard cell types  
1266 (Figure 2E) suggesting other than standard cell types express the CSF1R and CD31 marker  
1267 (potential cell trans-differentiation).  
1268 (F) Systematic testing of endothelial cell, endothelial and pericyte (union) cell and proliferating  
1269 tumor cell cluster formation at palbociclib and control PEG reservoir based on cluster size  
1270 presented in form of a heatmap. Cluster size was defined by minimal number of cells (x axis)  
1271 within maximum distance range (y axis). Total coverage, number of clusters in the assay area  
1272 variance between palbociclib and PEG in these two parameters was evaluated. Yellow rectangle  
1273 defines cluster sizes that form specifically at the palbociclib stimulus site and have maximal  
1274 variance (PEG vs palbociclib). Treatment specific cluster formation appears when minimum 10-  
1275 20 cells are present with 50-75 $\mu$ m and 30-50 $\mu$ m for endothelial/pericyte cells and proliferating  
1276 tumor cells, respectively.  
1277 (G) Three-dimensional composite image of another palbociclib tumor tissue section. F4/80  
1278 macrophage marker is presented in high-view. Triangle arrow, which shows the localization and  
1279 direction of the drug release, is shifted slightly to the right so that both normal tissue and  
1280 Palbociclib affected region can be seen at once. Note slightly different extent of the TME  
1281 response as compared to replicate number 1 (Figure 2B), while the shape and the order of the cell  
1282 response with distance remains the same: CSF1R+, F4/80+ macrophages located in close  
1283 proximity to the well; CD31  $\alpha$ SMA pericyte form network outside this region and Ki67  
1284 proliferating cells appear de novo (in the local microculture) around network.

1285

1286 Figure S4. Locally induced tumor-TME changes at the venetoclax delivery sites; Related to  
1287 Figure 3.

1288 (A) Quantification of single cell events at the venetoclax delivery site in spontaneous MMTV-  
1289 PyMT tumors at three days of exposure by using individual markers and marker combinations  
1290 (including standard cell types). Total cell counts to define percentage of positivity were between  
1291 3000 to 5000 cells per assay area and were matched  $\pm$  300 total cells for paired samples

1292 (experimental vs control region). Minimum population proportion within 5% margin of error and  
1293 95% confidence level was set to 0.75% (represents 12 cells) to discriminate noise from specific  
1294 cell enrichment. Bars are mean  $\pm$  s.e.; n=3 venetoclax reservoirs in two tumors from two  
1295 different mice. Significance was calculated by paired sample one tailed t-test.

1296 (B) Gray scale single channel images of depicted markers at the Venetoclax reservoir.  
1297 Macroscopic view is on the left; magnified view of stromal regions and venetoclax proximal  
1298 region are in the middle and right, respectively. Composite of depicted markers is in the colored  
1299 image. Scale bar, 500 $\mu$ m and 50 $\mu$ m for macroscopic and zoomed view, respectively.

1300 (C) Presentation of key response cell types/states (biomarker combination displayed) in XY  
1301 space. [0,0] coordinate is the drug releasing site; direction of the release is from the bottom to the  
1302 top.

1303

1304 Figure S5. Local and systemic effects of the pan-HDAC inhibitor, panobinostat, in different  
1305 mouse models of breast cancer. Related to Figure 4.

1306 (A) Quantification of single cell events at the panobinostat delivery site in spontaneous MMTV-  
1307 PyMT tumors at three days of exposure by using individual markers and marker combinations  
1308 including standard cell types. Total cell counts to define percentage of positivity were between  
1309 3000 to 5000 cells per assay area and were matched  $\pm$  300 total cells for paired samples  
1310 (experimental vs control region). Minimum population proportion within 5% margin of error and  
1311 95% confidence level was set to 0.75% (represents 12 cells) to discriminate noise from specific  
1312 cell enrichment. Bars are mean  $\pm$  s.e.; n=3 panobinostat reservoirs in two tumors from two  
1313 different mice. Significance was calculated by paired sample one tailed t-test.

1314 (B) Presentation of the most prominent response cell types (biomarker combination displayed) in  
1315 XY space. Black arrow marks source and direction of drug release.

1316 (C) Gray-scale single channel images of depicted markers at the panobinostat reservoir (replicate  
1317 1). Dashed line in the Sox9 image marks the border of the device. Scale bar, 100 $\mu$ m. Dashed  
1318 yellow box in the Ly6G image marks magnified view of a region at the intersection of dying  
1319 cells (by CC3) and surrounding TME. Scale bar, 50 $\mu$ m.

1320 (D) ErbB2 $\Delta$ Ex16 mice with spontaneously growing tumors were treated with diluent (control)  
1321 and panobinostat systemically for 4 days, after which the tumors were extracted at day 7 and

1322 formalin fixed paraffin processed (FFPE). Images show tumor tissue sections stained with anti-  
1323 mouse CD8 antibody (red AEC signal) and hematoxylin (blue). Note the gradient of high CD8  
1324 infiltration closer to stroma with decreasing tendency towards the tumor center (arrows)  
1325 suggesting CD8 T cells are recruited from stroma regions. Scale bar, 100 $\mu$ m  
1326 (E, F) Tumor growth rate in syngeneic LPA3 mice in which tumors were induced by orthotopic  
1327 injection of primary tumor cells into mammary fat pad. The mice were treated systemically by  
1328 depicted treatments as shown in the graph. Early (<20mm<sup>3</sup>; D) and more advanced (>100mm<sup>3</sup>,  
1329 E) tumors were tested as for the treatment start (day 0). Mice were treated intraperitoneally with  
1330 dose and schedule as defined in [Figure 3G](#) and [4H](#). Line graphs show mean  $\pm$  s.e., n=5 tumors in  
1331 five mice per group. Significance was calculated by two sample two-tailed t-test with equal  
1332 variance.

1333

1334 **Figure S6. Biomarkers of immunogenic cell death and associated mechanisms of resistance**  
1335 **induced by local panobinostat drug stimulus; Related to Figure 5.**

1336 (A) Large field of view three-color composite images showing biomarkers of immunogenic cell  
1337 death induced by panobinostat (replicate 2) reservoir at three days of exposure. Calreticulin and  
1338 PD-L1 IHC (red AEC signal) overlaid on hematoxylin nuclei (in blue) are presented in bright  
1339 field zoomed image on the left.

1340 (B) Quantification of single cells positive cells for depicted biomarker with distance from the  
1341 reservoir; total cell counts (left) and rate of positive cells (right) are presented in form of a 3D  
1342 bar graph. 2-3 ROIs are presented per assay zone (proximal, distal, distal, remote, control).

1343 (C) Expression rate of CD45, MPO and arginase-1 on Ly6G<sup>+</sup> cells in the panobinostat assay area  
1344 to stratify phagocytic, cytotoxic and immune suppressive neutrophils, respectively. Number (n)  
1345 of analyzed cells is presented.

1346 (D) Panobinostat reservoirs were co-loaded with anti-Ly6G (clone 1A8) and galectin-3 (clone  
1347 M3/38) antibodies at 5:1 to 10:1 ratio and CC3 IHC signal was quantified at the drug releasing  
1348 site. n=2 for experimental and 1 for control conditions, respectively. All results were obtained  
1349 from a single IMD in one tumor which was implanted for two instead of typical three days to  
1350 account for antibody half-live.

1351 (E) Image cytometry measuring neuropilin-1 expression on cytotoxic neutrophils. For  
1352 comparison, population distribution of all cells is presented on the bottom left.



1353 (F) Bright field large field of view images of CD11b, neuropilin-1, galectin-3 and  $\alpha$ SMA IHC at  
1354 the panobinostat reservoir (replicate 3) at 3 days of exposure. Zoomed images show color-coded  
1355 extracted signal overlaid on the true signal of the depicted biomarkers (white).  
1356 (G) Distance based cluster analysis testing different cluster size strategies to identify treatment  
1357 specific cluster formation. The function implements a user defined cluster sizes set by minimal  
1358 number of cells (first number in the top right legend) within maximum distance range (second  
1359 number in the top right legend) to display cluster formation in randomized color while individual  
1360 cells not meeting the clustering criteria are presented in gray. Drug source is shifted to the left to  
1361 stratify cluster formation in assay area (proximity to the well) vs side/random regions. Clustering  
1362 strategies using low cell number (e.g. 5 cells, first two columns) and high distances (e.g. 100 $\mu$ m,  
1363 right column) show clusters forming unspecifically outside the assay area; Clustering strategy  
1364 using minimal 10 cells within maximum distance range 50 $\mu$ m (10/50 column) shows cluster  
1365 formation specifically above the drug site for all presented markers (F4/80, Galectin-3, Ly6G,  
1366 Sox9). Magnified Sox9 cluster formation; bottom.  
1367 (H) Frequency of Sox9 cluster sizes. Cluster size around 175 $\mu$ m in diameter, which were the  
1368 most prominent, were used for downstream analysis of pairwise proximity measurements of  
1369 Sox9 with other markers (Figure 5G, H).

1370

1371 Figure S7. Local panobinostat efficacy in other mouse model and at a later (day 8) timepoint;  
1372 Related to Figure 5

1373 (A) A schematic presentation of cell phenotype separation into zones with distance from the  
1374 panobinostat reservoir at day three and day eight timepoint. Shared phenotypes between the two  
1375 timepoints suggest order of the cell transition with distance from the well defines the sequence of  
1376 cellular events (earliest to latest) and is as follows: 1) MHC-II antigen presenting cells and F4/80  
1377 macrophages are recruited first to the drug delivery well as they are located *immediately* at the  
1378 drug well at early timepoint; 2) MPO cytotoxic, ICAM1 adhesive/activated, neuropilin-1 positive  
1379 N1 neutrophils are recruited second (*proximal* zone) and this phenotype is halt by the *border*  
1380 barrier composed of 3) CD11c dendritic cells, Sox9 cancer stem cells and galectin-3. Relative  
1381 increase of MHC-I and calreticulin on the cell surface starts to form in this border zone and  
1382 propagates to (4) *distal* region with decreasing gradient profile. 5) galectin-3 expression is  
1383 associated with PD-L1 and is halt by  $\alpha$ SMA fibroblast *remotely* from the well. Over time, the last



1384 three zones (3-5) merge into a single border zone composed of CD11c dendritic cells, arg-1  
1385 immune suppressive cells, Sox9 cancer stem cells, K14 cells of invasive front and ECM  
1386 deposition/processing components (collagen VI and MMP2). The immediate macrophage zone  
1387 is missing at the day eight timepoint; instead, two new cell types appear at the new border zone:  
1388 (6) CSF1R+ cells (C) and (7) granzyme B cytotoxic CD45R B cells (D).  
1389 (B) ErbB2 $\Delta$ Ex16 mice with spontaneously growing tumors were implanted with IMD loaded  
1390 with panobinostat and the tumor with the device in place was extracted at three days and was  
1391 formalin fixed and paraffin processed. Picture shows a five-color composite image of biomarkers  
1392 associated with immunogenic cell death. While the absolute extent of the phenotype is larger as  
1393 compared to those observation in MMTV-PyMT model; the order of the phenotypes (spatial cell  
1394 pattern with distance from the drug source) remains identical with Ly6G+ leukocytes and CC3  
1395 apoptosis present at the proximal, CD11c dendritic cells present at border and galectin-3 present  
1396 at the distal regions. We note that the ErbB2 $\Delta$ Ex16 model of breast cancer express both basal  
1397 and luminal cytokeratin markers (Turpin et al., 2016). The different extent of the signal might be  
1398 associated with the tumor subtype difference or the compactness/"fluidity" of the tumor tissue.  
1399 (C) Sectioned tissue surrounding the implantable microdevice containing panobinostat for eight  
1400 days was stained with cycIF using panel of mouse specific antibodies (Table S3) to display cellular  
1401 phenotypes supporting the panobinostat model of response describe in (A).  
1402 (D) Adjacent section as described in (C) was stained by multiplex immunohistochemistry using  
1403 mouse specific antibodies (Table S2) and displays presence of cytotoxic granzyme B+ CD45R+  
1404 B cells expressing calreticulin and galectin-3. No other marker was expressed on these cells (or  
1405 under the IHC sensitivity limit; not shown). Also, no other cells expressed the granzyme B  
1406 cytotoxicity marker intratumorally; inside the tumor bed. Panobinostat drug release site is  
1407 marked by triangle in all images. Direction of the drug release is always from the bottom to the  
1408 top. Scale bars; shown.

1409

1410 Figure S8. Illustration of complex tumor tissue response to targeted therapies and rational for  
1411 immune modulatory combinations.

1412 Schematic presentation of the spatial cell associations induced by palbociclib, venetoclax and  
1413 panobinostat at three days of local drug exposure; and panobinostat at eight days of drug  
1414 exposure (bottom right). Palbociclib efficacy is associated with a "tree" or "delta-like" cell

1415 organization with targetable protumorigenic macrophages being localized in immediate  
1416 proximity to the reservoir leading to endothelial/pericyte network formation and proliferation of  
1417 tumor cells in proximity to this network. The optimal schedule of immunotherapy application  
1418 can be estimated based on the location of the targetable phenotype from the drug well. Early  
1419 (pre-treatment) modulation of protumorigenic macrophages using CSF1/CSF1R targeted  
1420 immunotherapy was used to potentiate the efficacy of palbociclib. Venetoclax induces small  
1421 vessel formation and recruitment of dendritic cells which appeared as “split clusters” at the drug  
1422 well and it is yet unknown whether and how the subsets are functionally related. Anti-CD40  
1423 mediated licensing of these DCs can shift the balance from immune tolerance to T cell priming  
1424 and this immunotherapy was applied at three days of venetoclax treatment since DCs were  
1425 present in all regions of the assay area. Panobinostat induces immunogenic cell death associated  
1426 with infiltration of antigen presenting neutrophils and macrophages but the propagation of this  
1427 positive response is limited by enrichment of cancer stem cells and recruitment of dendritic cells  
1428 and fibroblasts which merge into a resistant barrier over time and subsequently induce  
1429 recruitment of protumorigenic macrophages and cytotoxic B cells. The cellular pattern of  
1430 response has a “layering” or bay-like” structure implying more intense cell interaction might be  
1431 involved at the cell layer interfaces. Anti-PD-1 immunotherapy was identified as the rational  
1432 combination partner for panobinostat due to induction of immunogenic cell death and increased  
1433 antigenicity. While early (pretreatment) administration of CSF1/CSF1R targeted immunotherapy  
1434 can negatively affect antitumor function of macrophages (tested, [Figure 4C](#)); late administration  
1435 of this immunotherapy might be beneficial to deplete/polarize the protumor macrophage which  
1436 are recruited at the later timepoint (hypothetical).

1437

1438 Figure S9. Local and systemic effects of the pan-HDAC inhibitor, panobinostat, in different  
1439 mouse models of breast cancer.

1440 (A) Quantification of single cell events at the intersection of venetoclax and panobinostat  
1441 delivery sites in orthotopic MMTV-PyMT tumors at eight days of exposure by using individual  
1442 markers and marker combinations. Total cell counts to define percentage of positivity were  
1443 between 3000 to 5000 cells per assay area and were matched  $\pm 300$  total cells for paired samples  
1444 (experimental vs control region). Minimum population proportion within 5% margin of error and  
1445 95% confidence level was set to 0.75% (represents 12 cells) to discriminate noise from specific

1446 cell enrichment. Bars are mean  $\pm$  s.e.; n=2 wells from one tumor in one mouse. Significance was  
1447 calculated by paired sample one tailed t-test.

1448 (B) Macroscopic view of marker positive cells at the panobinostat/venetoclax drug intersection.  
1449 Histograms show mean expression intensity of individual biomarkers. Red line defines threshold  
1450 for positivity. Marker positive cells as defined by threshold are presented as blue dots in XY  
1451 space. Black arrow is pointing on the tumor stroma region remote from the reservoir. Yellow  
1452 triangle arrows indicate the source and direction of the drug release. Yellow box shows the  
1453 approximation of the assay area.

1454 (C) Five-color composite images showing most prominent biomarkers induced at the intersection  
1455 of panobinostat and venetoclax. White arrows indicate the source and direction of the drug  
1456 release. Scale bar; 200 $\mu$ m. Macroscopic view of tumor tissue sections stained with anti-mouse  
1457 F4/80 (red AEC signal) and hematoxylin (blue). Tumor cleared tissue is shown by lack of  
1458 hematoxylin staining in the center suggesting lack of nucleated cells (bottom left image).  
1459 Magnified view of intratumoral T cell infiltration to professional antigen presenting DC region  
1460 near panobinostat/venetoclax assay area. The device was implanted for eight days in MMTV-  
1461 PyMT tumor induced by orthotopic implant into mammary fat pad of syngeneic mice.

1462

## 1463 REFERENCES

1464 Adams, S., Gatti-Mays, M.E., Kalinsky, K., Korde, L.A., Sharon, E., Amiri-Kordestani, L., Bear,  
1465 H., McArthur, H.L., Frank, E., Perlmutter, J., Page, D.B., Vincent, B., Hayes, J.F., Gulley,  
1466 J.L., Litton, J.K., Hortobagyi, G.N., Chia, S., Krop, I., White, J., Sparano, J., Disis, M.L.,  
1467 Mittendorf, E.A., 2019. Current Landscape of Immunotherapy in Breast Cancer: A Review.  
1468 JAMA Oncol. 5, 1205–1214. <https://doi.org/10.1001/jamaoncol.2018.7147>

1469 Aguilera, T.A., Rafat, M., Castellini, L., Shehade, H., Kariolis, Mihalis S., Hui, A.B.-Y., Stehr,  
1470 H., Eyben, R. von, Jiang, D., Ellies, Lesley G., Koong, A.C., Diehn, M., Rankin, Erinn B.,  
1471 Graves, E.E., Giaccia, A.J., Postow, M.A., Callahan, M.K., Wolchok, J.D., Hodi, F.S.,  
1472 Brahmer, J.R., Topalian, S.L., Robert, C., Postow, M.A., Hiniker, S.M., Slovin, S.F., Victor,  
1473 C.T.-S., Golden, E.B., Demaria, S., Schiff, P.B., Chachoua, A., Formenti, S.C., Grimaldi,  
1474 A.M., Deng, L., Sharabi, A.B., Reits, E.A., Dovedi, S.J., Spranger, S., Bao, R., Gajewski,  
1475 T.F., Kim, K., Finisguerra, V., Zhang, Z., Rankin, E. B., Graham, D.K., DeRyckere, D.,

- 1476 Davies, K.D., Earp, H.S., Hugo, W., Youn, J.I., Nagaraj, S., Collazo, M., Gabrilovich, D.I.,  
1477 Peggs, K.S., Quezada, S.A., Chambers, C.A., Korman, A.J., Allison, J.P., Dewan, M.Z.,  
1478 Rothlin, C. V., Ghosh, S., Zuniga, E.I., Oldstone, M.B., Lemke, G., Sen, P., Camenisch,  
1479 T.D., Koller, B.H., Earp, H.S., Matsushima, G.K., Pollack, B.P., Sapkota, B., Cartee, T. V.,  
1480 Cline, M.S., Byers, L.A., Merad, M., Sathe, P., Helft, J., Miller, J., Mortha, A., Tiemessen,  
1481 M.M., Liu, G., Kariolis, M. S., Ye, X., Sheridan, C., Liu, L., Zagorska, A., Traves, P.G.,  
1482 Lew, E.D., Dransfield, I., Lemke, G., Paolino, M., Alciato, F., Sainaghi, P.P., Sola, D.,  
1483 Castello, L., Avanzi, G.C., Paccetz, J.D., Davie, S.A., Bao, L., Cardiff, R.D., Steinbach, P.,  
1484 Messer, K.S., Ellies, L. G., Newman, A.M., 2016. Reprogramming the immunological  
1485 microenvironment through radiation and targeting Axl. *Nat. Commun. Publ. online* 23  
1486 December 2016; | doi10.1038/ncomms13898 7, 1974–1982.  
1487 <https://doi.org/10.1038/ncomms13898>
- 1488 Albregues, J., Shields, M.A., Ng, D., Park, C.G., Ambrico, A., Poindexter, M.E., Upadhyay, P.,  
1489 Uyeminami, D.L., Pommier, A., Küttner, V., Bružas, E., Maiorino, L., Bautista, C.,  
1490 Carmona, E.M., Gimotty, P.A., Fearon, D.T., Chang, K., Lyons, S.K., Pinkerton, K.E.,  
1491 Trotman, L.C., Goldberg, M.S., Yeh, J.T.H., Egeblad, M., 2018. Neutrophil extracellular  
1492 traps produced during inflammation awaken dormant cancer cells in mice. *Science* (80-. ).  
1493 361. <https://doi.org/10.1126/science.aao4227>
- 1494 Atadja, P., 2009. Development of the pan-DAC inhibitor panobinostat (LBH589): Successes and  
1495 challenges. *Cancer Lett.* 280, 233–241. <https://doi.org/10.1016/j.canlet.2009.02.019>
- 1496 Attalla, S., Taifour, T., Bui, T., Muller, W., 2021. Insights from transgenic mouse models of  
1497 PyMT-induced breast cancer: recapitulating human breast cancer progression in vivo.  
1498 *Oncogene* 40, 475–491. <https://doi.org/10.1038/s41388-020-01560-0>
- 1499 Banchereau, J., Steinman, R.M., 1998. Dendritic cells and the control of immunity. [Review]  
1500 [103 refs]. *Nature* 392, 245–252.
- 1501 Banik, G., Betts, C.B., Liudahl, S.M., Sivagnanam, S., Cotechini, T., Larson, W., Goecks, J., Pai,  
1502 S.I., Daniel, R., Tsujikawa, T., Coussens, L.M., Biology, C., Health, O., States, U., Surgery,  
1503 N., Health, O., States, U., Program, B., Health, O., General, M., Cancer, H., States, U.,  
1504 Health, O., Division, C., Surgery, N., 2020. HHS Public Access 1–20.  
1505 <https://doi.org/10.1016/bs.mie.2019.05.039.High-dimensional>

- 1506 Bergers, G., Song, S., 2005. The role of pericytes in blood-vessel formation and maintenance.  
1507 *Neuro. Oncol.* 7, 452–464. <https://doi.org/10.1215/s1152851705000232>
- 1508 Bergers, G., Song, S., Meyer-Morse, N., Bergsland, E., Hanahan, D., 2003. Benefits of targeting  
1509 both pericytes and endothelial cells in the tumor vasculature with kinase inhibitors. *J. Clin.*  
1510 *Invest.* 111, 1287–1295. <https://doi.org/10.1172/JCI200317929>
- 1511 Bettaieb, A., Paul, C., Plenchette, S., Shan, J., Chouchane, L., Ghiringhelli, F., 2017. Precision  
1512 medicine in breast cancer: Reality or utopia? *J. Transl. Med.* 15, 1–13.  
1513 <https://doi.org/10.1186/s12967-017-1239-z>
- 1514 Brady, S.W., Mcquerry, J.A., Qiao, Y., Piccolo, S.R., Shrestha, G., Jenkins, D.F., Layer, R.M.,  
1515 Pedersen, B.S., Miller, R.H., Esch, A., Selitsky, S.R., Parker, J.S., Anderson, L.A., Dalley,  
1516 B.K., Factor, R.E., Reddy, C.B., Boltax, J.P., Li, D.Y., Moos, P.J., Gray, J.W., Heiser,  
1517 L.M., Buys, S.S., Cohen, A.L., Johnson, W.E., Quinlan, A.R., Marth, G., Werner, T.L.,  
1518 Bild, A.H., 2017. Combating subclonal evolution of resistant cancer phenotypes. *Nat.*  
1519 *Commun.* <https://doi.org/10.1038/s41467-017-01174-3>
- 1520 Broz, M.L., Binnewies, M., Boldajipour, B., Nelson, A.E., Pollack, J.L., Erle, D.J., Barczak, A.,  
1521 Rosenblum, M.D., Daud, A., Barber, D.L., Amigorena, S., van'tVeer, L.J., Sperling, A.I.,  
1522 Wolf, D.M., Krummel, M.F., 2014. Dissecting the Tumor Myeloid Compartment Reveals  
1523 Rare Activating Antigen-Presenting Cells Critical for T Cell Immunity. *Cancer Cell* 26,  
1524 638–652. <https://doi.org/10.1016/j.ccell.2014.09.007>
- 1525 Budman, D.R., Calabro, A., Rosen, L., Lesser, M., 2012. Identification of unique synergistic  
1526 drug combinations associated with downexpression of survivin in a preclinical breast cancer  
1527 model system. *Anticancer. Drugs* 23, 272–279.  
1528 <https://doi.org/10.1097/CAD.0b013e32834ebda4>
- 1529 Byrne, K.T., Vonderheide, R.H., 2016. CD40 Stimulation Obviates Innate Sensors and Drives T  
1530 Cell Immunity in Cancer. *Cell Rep.* 15, 2719–2732.  
1531 <https://doi.org/10.1016/j.celrep.2016.05.058>
- 1532 Cardoso, F., Senkus, E., Costa, A., Papadopoulos, E., Aapro, M., André, F., Harbeck, N., Aguilar  
1533 Lopez, B., Barrios, C.H., Bergh, J., Biganzoli, L., Boers-Doets, C.B., Cardoso, M.J., Carey,  
1534 L.A., Cortés, J., Curigliano, G., Dié Ras, V., El Saghir, N.S., Eniu, A., Fallowfield, L.,

- 1535 Francis, P.A., Gelmon, K., Johnston, S.R.D., Kaufman, B., Koppikar, S., Krop, I.E., Mayer,  
1536 M., Nakigudde, G., Offersen, B. V., Ohno, S., Pagani, O., Paluch-Shimon, S., Penault-  
1537 Llorca, F., Prat, A., Rugo, H.S., Sledge, G.W., Spence, D., Thomssen, C., Vorobiof, D.A.,  
1538 Xu, B., Norton, L., Winer, E.P., 2018. 4th ESO-ESMO international consensus guidelines  
1539 for advanced breast cancer (ABC 4). *Ann. Oncol.* 29, 1634–1657.  
1540 <https://doi.org/10.1093/annonc/mdy192>
- 1541 Carpenter, A.E., Jones, T.R., Lamprecht, M.R., Clarke, C., Kang, I.H., Friman, O., Guertin,  
1542 D.A., Chang, J.H., Lindquist, R.A., Moffat, J., Golland, P., Sabatini, D.M., 2006.  
1543 CellProfiler: Image analysis software for identifying and quantifying cell phenotypes.  
1544 *Genome Biol.* 7. <https://doi.org/10.1186/gb-2006-7-10-r100>
- 1545 Catalano, M.G., Poli, R., Pugliese, M., Fortunati, N., Boccuzzi, G., 2007. Valproic acid enhances  
1546 tubulin acetylation and apoptotic activity of paclitaxel on anaplastic thyroid cancer cell  
1547 lines. *Endocr. Relat. Cancer* 14, 839–845. <https://doi.org/10.1677/ERC-07-0096>
- 1548 Chang, Y.H., Tsujikawa, T., Margolin, A., Coussens, L.M., Gray, J.W., 2017. Multiplexed  
1549 immunohistochemistry image analysis using sparse coding. *Proc. Annu. Int. Conf. IEEE*  
1550 *Eng. Med. Biol. Soc. EMBS* 4046–4049. <https://doi.org/10.1109/EMBC.2017.8037744>
- 1551 Chawla, A., Alatrash, G., Philips, A. V., Qiao, N., Sukhumalchandra, P., Kerros, C., Diaconu, I.,  
1552 Gall, V., Neal, S., Peters, H.L., Clise-Dwyer, K., Molldrem, J.J., Mittendorf, E.A., 2016.  
1553 Neutrophil elastase enhances antigen presentation by upregulating human leukocyte antigen  
1554 class I expression on tumor cells. *Cancer Immunol. Immunother.* 65, 741–751.  
1555 <https://doi.org/10.1007/s00262-016-1841-6>
- 1556 Chen, J., Fiskus, W., Eaton, K., Fernandez, P., Wang, Y., Rao, R., Lee, P., Joshi, R., Yang, Y.,  
1557 Kolhe, R., Balusu, R., Chappa, P., Natarajan, K., Jillella, A., Atadja, P., Bhalla, K.N., 2009.  
1558 Cotreatment with BCL-2 antagonist sensitizes cutaneous T-cell lymphoma to lethal action  
1559 of HDAC7-Nur77-based mechanism. *Blood* 113, 4038–4048. [https://doi.org/10.1182/blood-](https://doi.org/10.1182/blood-2008-08-176024)  
1560 [2008-08-176024](https://doi.org/10.1182/blood-2008-08-176024)
- 1561 Cheung, K.J., Gabrielson, E., Werb, Z., Ewald, A.J., 2013. Collective invasion in breast cancer  
1562 requires a conserved basal epithelial program. *Cell* 155, 1639–1651.  
1563 <https://doi.org/10.1016/j.cell.2013.11.029>



- 1564 Cheung, K.J., Padmanaban, V., Silvestri, V., Schipper, K., Cohen, J.D., Fairchild, A.N., Gorin,  
1565 M.A., Verdone, J.E., Pienta, K.J., Bader, J.S., Ewald, A.J., 2016. Polyclonal breast cancer  
1566 metastases arise from collective dissemination of keratin 14-expressing tumor cell clusters.  
1567 Proc. Natl. Acad. Sci. 113, E854–E863. <https://doi.org/10.1073/pnas.1508541113>
- 1568 Conte, M., De Palma, R., Altucci, L., 2018. HDAC inhibitors as epigenetic regulators for cancer  
1569 immunotherapy. *Int. J. Biochem. Cell Biol.* 98, 65–74.  
1570 <https://doi.org/10.1016/j.biocel.2018.03.004>
- 1571 Denardo, D.G., Brennan, D.J., Rexhepaj, E., Ruffell, B., Shiao, S.L., Madden, S.F., Gallagher,  
1572 W.M., Wadhvani, N., Keil, S.D., Sharfaa, A., Rugo, H.S., Hwang, E.S., Jirström, K., West,  
1573 B.L., Lisa, M., 2011. Functionally Regulates Response to Chemotherapy. *Cancer Discov.*  
1574 54–67. <https://doi.org/10.1158/2159-8274.CD-10-0028>.Leukocyte
- 1575 Deng, J., Wang, E.S., Jenkins, R.W., Li, S., Dries, R., Yates, K., Chhabra, S., Huang, W., Liu,  
1576 H., Aref, A.R., Ivanova, E., Paweletz, C.P., Bowden, M., Zhou, C.W., Herter-Sprrie, G.S.,  
1577 Sorrentino, J.A., Bisi, J.E., Lizotte, P.H., Merlino, A.A., Quinn, M.M., Bufo, L.E., Yang,  
1578 A., Zhang, Y., Zhang, H., Gao, P., Chen, T., Cavanaugh, M.E., Rode, A.J., Haines, E.,  
1579 Roberts, P.J., Strum, J.C., Richards, W.G., Lorch, J.H., Parangi, S., Gunda, V., Boland,  
1580 G.M., Bueno, R., Palakurthi, S., Freeman, G.J., Ritz, J., Haining, W.N., Sharpless, N.E.,  
1581 Arthanari, H., Shapiro, G.I., Barbie, D.A., Gray, N.S., Wong, K.-K., 2017. CDK4/6  
1582 Inhibition Augments Anti-Tumor Immunity by Enhancing T Cell Activation. *Cancer*  
1583 *Discov.* CD-17-0915. <https://doi.org/10.1158/2159-8290.CD-17-0915>
- 1584 Deszo, E.L., Brake, D.K., Cengel, K.A., Kelley, K.W., Freund, G.G., 2001. CD45 Negatively  
1585 Regulates Monocytic Cell Differentiation by Inhibiting Phorbol 12-Myristate 13-Acetate-  
1586 dependent Activation and Tyrosine Phosphorylation of Protein Kinase C $\delta$ . *J. Biol. Chem.*  
1587 276, 10212–10217. <https://doi.org/10.1074/jbc.M010589200>
- 1588 Dominas, C., Bhagavatula, S., Stover, E.H., Deans, K., Larocca, C., Colson, L., Peruzzi, P.,  
1589 Kibel, A.S., Hata, N., Tsai, L.L., Hung, Y.P., Jonas, O., 2021. The translational and  
1590 regulatory development of an implantable microdevice for multiple drug sensitivity  
1591 measurements in cancer patients 1–10. <https://doi.org/10.1109/TBME.2021.3096126>
- 1592 Domogalla, M.P., Rostan, P. V., Raker, V.K., Steinbrink, K., 2017. Tolerance through education:



- 1593 How tolerogenic dendritic cells shape immunity. *Front. Immunol.* 8, 1–14.  
1594 <https://doi.org/10.3389/fimmu.2017.01764>
- 1595 Dummer, R., Ascierto, P.A., Nathan, P., Robert, C., Schadendorf, D., 2020. Rationale for  
1596 Immune Checkpoint Inhibitors plus Targeted Therapy in Metastatic Melanoma: A Review.  
1597 *JAMA Oncol.* 6, 1957–1966. <https://doi.org/10.1001/jamaoncol.2020.4401>
- 1598 Dunn, G.P., Old, L.J., Schreiber, R.D., 2004. The Three Es of Cancer Immunoediting. *Annu.*  
1599 *Rev. Immunol.* 22, 329–360. <https://doi.org/10.1146/annurev.immunol.22.012703.104803>
- 1600 Force, J., Leal, J.H.S., McArthur, H.L., 2019. Checkpoint Blockade Strategies in the Treatment  
1601 of Breast Cancer: Where We Are and Where We Are Heading. *Curr. Treat. Options Oncol.*  
1602 20. <https://doi.org/10.1007/s11864-019-0634-5>
- 1603 Fridlender, Z.G., Sun, J., Kim, S., Kapoor, V., Cheng, G., Ling, L., Worthen, G.S., Albelda,  
1604 S.M., 2009. Polarization of Tumor-Associated Neutrophil Phenotype by TGF- $\beta$ : “N1”  
1605 versus “N2” TAN. *Cancer Cell* 16, 183–194. <https://doi.org/10.1016/j.ccr.2009.06.017>
- 1606 Galluzzi, L., Vitale, I., Aaronson, S.A., Abrams, J.M., Adam, D., Agostinis, P., Alnemri, E.S.,  
1607 Altucci, L., Amelio, I., Andrews, D.W., Annicchiarico-Petruzzelli, M., Antonov, A. V.,  
1608 Arama, E., Baehrecke, E.H., Barlev, N.A., Bazan, N.G., Bernassola, F., Bertrand, M.J.M.,  
1609 Bianchi, K., Blagosklonny, M. V., Blomgren, K., Borner, C., Boya, P., Brenner, C.,  
1610 Campanella, M., Candi, E., Carmona-Gutierrez, D., Cecconi, F., Chan, F.K.M., Chandel,  
1611 N.S., Cheng, E.H., Chipuk, J.E., Cidlowski, J.A., Ciechanover, A., Cohen, G.M., Conrad,  
1612 M., Cubillos-Ruiz, J.R., Czabotar, P.E., D’Angiolella, V., Dawson, T.M., Dawson, V.L., De  
1613 Laurenzi, V., De Maria, R., Debatin, K.M., Deberardinis, R.J., Deshmukh, M., Di Daniele,  
1614 N., Di Virgilio, F., Dixit, V.M., Dixon, S.J., Duckett, C.S., Dynlacht, B.D., El-Deiry, W.S.,  
1615 Elrod, J.W., Fimia, G.M., Fulda, S., García-Sáez, A.J., Garg, A.D., Garrido, C., Gavathiotis,  
1616 E., Golstein, P., Gottlieb, E., Green, D.R., Greene, L.A., Gronemeyer, H., Gross, A.,  
1617 Hajnoczky, G., Hardwick, J.M., Harris, I.S., Hengartner, M.O., Hetz, C., Ichijo, H., Jäättelä,  
1618 M., Joseph, B., Jost, P.J., Juin, P.P., Kaiser, W.J., Karin, M., Kaufmann, T., Kepp, O.,  
1619 Kimchi, A., Kitsis, R.N., Klionsky, D.J., Knight, R.A., Kumar, S., Lee, S.W., Lemasters,  
1620 J.J., Levine, B., Linkermann, A., Lipton, S.A., Lockshin, R.A., López-Otín, C., Lowe, S.W.,  
1621 Luedde, T., Lugli, E., MacFarlane, M., Madeo, F., Malewicz, M., Malorni, W., Manic, G.,  
1622 Marine, J.C., Martin, S.J., Martinou, J.C., Medema, J.P., Mehlen, P., Meier, P., Melino, S.,

- 1623 Miao, E.A., Molkentin, J.D., Moll, U.M., Muñoz-Pinedo, C., Nagata, S., Nuñez, G., Oberst,  
1624 A., Oren, M., Overholtzer, M., Pagano, M., Panaretakis, T., Pasparakis, M., Penninger,  
1625 J.M., Pereira, D.M., Pervaiz, S., Peter, M.E., Piacentini, M., Pinton, P., Prehn, J.H.M.,  
1626 Puthalakath, H., Rabinovich, G.A., Rehm, M., Rizzuto, R., Rodrigues, C.M.P., Rubinsztein,  
1627 D.C., Rudel, T., Ryan, K.M., Sayan, E., Scorrano, L., Shao, F., Shi, Y., Silke, J., Simon,  
1628 H.U., Sistigu, A., Stockwell, B.R., Strasser, A., Szabadkai, G., Tait, S.W.G., Tang, D.,  
1629 Tavernarakis, N., Thorburn, A., Tsujimoto, Y., Turk, B., Vanden Berghe, T., Vandenabeele,  
1630 P., Vander Heiden, M.G., Villunger, A., Virgin, H.W., Vousden, K.H., Vucic, D., Wagner,  
1631 E.F., Walczak, H., Wallach, D., Wang, Y., Wells, J.A., Wood, W., Yuan, J., Zakeri, Z.,  
1632 Zhivotovsky, B., Zitvogel, L., Melino, G., Kroemer, G., 2018. Molecular mechanisms of  
1633 cell death: Recommendations of the Nomenclature Committee on Cell Death 2018. *Cell*  
1634 *Death Differ.* 25, 486–541. <https://doi.org/10.1038/s41418-017-0012-4>
- 1635 Garg, A.D., Vandenberk, L., Fang, S., Fasche, T., Van Eygen, S., Maes, J., Van Woensel, M.,  
1636 Koks, C., Vanthillo, N., Graf, N., De Witte, P., Van Gool, S., Salven, P., Agostinis, P.,  
1637 2017. Pathogen response-like recruitment and activation of neutrophils by sterile  
1638 immunogenic dying cells drives neutrophil-mediated residual cell killing. *Cell Death Differ.*  
1639 24, 832–843. <https://doi.org/10.1038/cdd.2017.15>
- 1640 Geiger, R., Rieckmann, J.C., Wolf, T., Basso, C., Feng, Y., Fuhrer, T., Kogadeeva, M., Picotti,  
1641 P., Meissner, F., Mann, M., Zamboni, N., Sallusto, F., Lanzavecchia, A., 2016. L-Arginine  
1642 Modulates T Cell Metabolism and Enhances Survival and Anti-tumor Activity. *Cell* 167,  
1643 829-842.e13. <https://doi.org/10.1016/j.cell.2016.09.031>
- 1644 Gil Del Alcazar, C.R., Huh, S.J., Ekram, M.B., Trinh, A., Liu, L.L., Beca, F., Zi, X., Kwak, M.,  
1645 Bergholtz, H., Su, Y., Ding, L., Russnes, H.G., Richardson, A.L., Babski, K., Kim, E.M.H.,  
1646 McDonnell, C.H., Wagner, J., Rowberry, R., Freeman, G.J., Dillon, D., Sorlie, T.,  
1647 Coussens, L.M., Garber, J.E., Fan, R., Bobolis, K., Allred, D.C., Jeong, J., Park, S.Y.,  
1648 Michor, F., Polyak, K., 2017. Immune escape in breast cancer during in situ to invasive  
1649 carcinoma transition. *Cancer Discov.* 7, 1098–1115. [https://doi.org/10.1158/2159-8290.CD-](https://doi.org/10.1158/2159-8290.CD-17-0222)  
1650 [17-0222](https://doi.org/10.1158/2159-8290.CD-17-0222)
- 1651 Gittens, B.R., Bodkin, J. V, Nourshargh, S., Perretti, M., Cooper, D., 2018. Galectin-3: A  
1652 Positive Regulator of Leukocyte Recruitment in the Inflamed Microcirculation.

- 1653 <https://doi.org/10.4049/jimmunol.1600709>
- 1654 Goel, S., Decristo, M.J., Watt, A.C., Brinjones, H., Sceneay, J., Li, B.B., Khan, N., Ubellacker,  
1655 J.M., Xie, S., Metzger-Filho, O., Hoog, J., Ellis, M.J., Ma, C.X., Ramm, S., Krop, I.E.,  
1656 Winer, E.P., Roberts, T.M., Kim, H.J., McAllister, S.S., Zhao, J.J., 2017. CDK4/6 inhibition  
1657 triggers anti-tumour immunity. *Nature* 548, 471–475. <https://doi.org/10.1038/nature23465>
- 1658 Goodridge, H.S., Reyes, C.N., Becker, C. a, Tamiko, R., Ma, J., Wolf, A.J., Bose, N., Chan,  
1659 A.S.H., Andrew, S., Danielson, M.E., Weiss, A., Vasilakos, J.P., David, M., 2011.  
1660 Activation of the innate immune receptor Dectin-1 upon formation of a “phagocytic  
1661 synapse”. *Nature* 472, 471–475. <https://doi.org/10.1038/nature10071>.Activation
- 1662 Graziani, G., Lecal, P.M., 2015. Neuropilin-1 as Therapeutic Target for Malignant Melanoma.  
1663 *Front. Oncol.* 5, 125. <https://doi.org/10.3389/fonc.2015.00125>
- 1664 Griffiths, K.L., Ahmed, M., Das, S., Gopal, R., Horne, W., Connell, T.D., Moynihan, K.D.,  
1665 Kolls, J.K., Irvine, D.J., Artyomov, M.N., Rangel-Moreno, J., Khader, S.A., 2016.  
1666 Targeting dendritic cells to accelerate T-cell activation overcomes a bottleneck in  
1667 tuberculosis vaccine efficacy. *Nat. Commun.* 7, 1–13.  
1668 <https://doi.org/10.1038/ncomms13894>
- 1669 Guerriero, J.L., Sotayo, A., Ponichtera, H.E., Castrillon, J.A., Pourzia, A.L., Schad, S., Johnson,  
1670 S.F., Carrasco, R.D., Lazo, S., Bronson, R.T., Davis, S.P., Lobera, M., Nolan, M.A., Letai,  
1671 A., 2017. Class IIa HDAC inhibition reduces breast tumours and metastases through anti-  
1672 tumour macrophages. *Nature*. <https://doi.org/10.1038/nature21409>
- 1673 Guerrouahen, B.S., Maccalli, C., Cugno, C., Rutella, S., Akporiaye, E.T., 2020. Reverting  
1674 Immune Suppression to Enhance Cancer Immunotherapy. *Front. Oncol.* 9.  
1675 <https://doi.org/10.3389/fonc.2019.01554>
- 1676 Guo, W., Keckesova, Z., Donaher, J.L., Shibue, T., Tischler, V., Reinhardt, F., Itzkovitz, S.,  
1677 Noske, A., Z??rrer-H??rdis, U., Bell, G., Tam, W.L., Mani, S.A., Van Oudenaarden, A.,  
1678 Weinberg, R.A., 2012. Slug and Sox9 cooperatively determine the mammary stem cell  
1679 state. *Cell* 148, 1015–1028. <https://doi.org/10.1016/j.cell.2012.02.008>
- 1680 Guy, C.T., Cardiff, R.D., Muller, W.J., 1992. Induction of mammary tumors by expression of  
1681 polyomavirus middle T oncogene: a transgenic mouse model for metastatic disease. *Mol.*

- 1682 Cell. Biol. 12, 954–961. <https://doi.org/10.1128/MCB.12.3.954>
- 1683 Hanahan, D., Coussens, L.M., 2012. Accessories to the Crime: Functions of Cells Recruited to  
1684 the Tumor Microenvironment. *Cancer Cell* 21, 309–322.  
1685 <https://doi.org/10.1016/j.ccr.2012.02.022>
- 1686 Hanker, A.B., Sudhan, D.R., Arteaga, C.L., 2020. Overcoming Endocrine Resistance in Breast  
1687 Cancer. *Cancer Cell* 37, 496–513. <https://doi.org/10.1016/j.ccell.2020.03.009>
- 1688 Harbeck, N., Spurdin, D., Zhan, L., Mitra, D., 2021. Advanced / Metastatic breast cancer: a  
1689 systematic literature review of real-world evidence studies 17, 2107–2122.
- 1690 Hegde, S., Krisnawan, V.E., Herzog, B.H., Zuo, C., Breden, M.A., Knolhoff, B.L., Hogg, G.D.,  
1691 Tang, J.P., Baer, J.M., Mpoy, C., Lee, K.B., Alexander, K.A., Rogers, B.E., Murphy, K.M.,  
1692 Hawkins, W.G., Fields, R.C., DeSelm, C.J., Schwarz, J.K., DeNardo, D.G., 2020. Dendritic  
1693 Cell Paucity Leads to Dysfunctional Immune Surveillance in Pancreatic Cancer. *Cancer*  
1694 *Cell* 37, 289-307.e9. <https://doi.org/10.1016/j.ccell.2020.02.008>
- 1695 Hellmann, M.D., Nathanson, T., Rizvi, H., Creelan, B.C., Sanchez-Vega, F., Ahuja, A., Ni, A.,  
1696 Novik, J.B., Mangarin, L.M.B., Abu-Akeel, M., Liu, C., Sauter, J.L., Rekhman, N., Chang,  
1697 E., Callahan, M.K., Chaft, J.E., Voss, M.H., Tenet, M., Li, X.M., Covelto, K., Renninger,  
1698 A., Vitazka, P., Geese, W.J., Borghaei, H., Rudin, C.M., Antonia, S.J., Swanton, C.,  
1699 Hammerbacher, J., Merghoub, T., McGranahan, N., Snyder, A., Wolchok, J.D., 2018.  
1700 Genomic Features of Response to Combination Immunotherapy in Patients with Advanced  
1701 Non-Small-Cell Lung Cancer. *Cancer Cell* 33, 843-852.e4.  
1702 <https://doi.org/10.1016/j.ccell.2018.03.018>
- 1703 Herschkowitz, J.I., Simin, K., Weigman, V.J., Mikaelian, I., Usary, J., Hu, Z., Rasmussen, K.E.,  
1704 Jones, L.P., Assefnia, S., Chandrasekharan, S., Backlund, M.G., Yin, Y., Khramtsov, A.I.,  
1705 Bastein, R., Quackenbush, J., Glazer, R.I., Brown, P.H., Green, J.E., Kopelovich, L., Furth,  
1706 P.A., Palazzo, J.P., Olopade, O.I., Bernard, P.S., Churchill, G.A., Van Dyke, T., Perou,  
1707 C.M., 2007. Identification of conserved gene expression features between murine mammary  
1708 carcinoma models and human breast tumors. *Genome Biol.* 8, 1–17.  
1709 <https://doi.org/10.1186/gb-2007-8-5-r76>
- 1710 Hoves, S., Ooi, C.H., Wolter, C., Sade, H., Bissinger, S., Schmittnaegel, M., Ast, O., Giusti,

- 1711 A.M., Wartha, K., Runza, V., Xu, W., Kienast, Y., Cannarile, M.A., Levitsky, H.,  
1712 Romagnoli, S., De Palma, M., Rüttinger, D., Ries, C.H., 2018. Rapid activation of tumor-  
1713 associated macrophages boosts preexisting tumor immunity. *J. Exp. Med.* 215, 859–876.  
1714 <https://doi.org/10.1084/jem.20171440>
- 1715 Hu, Z.I., McArthur, H.L., 2018. Immunotherapy in Breast Cancer: the New Frontier. *Curr.*  
1716 *Breast Cancer Rep.* 10, 35–40. <https://doi.org/10.1007/s12609-018-0274-y>
- 1717 Hugo, W., Zaretsky, J.M., Sun, L., Song, C., Moreno, B.H., Hu-Lieskovan, S., Berent-Maoz, B.,  
1718 Pang, J., Chmielowski, B., Cherry, G., Seja, E., Lomeli, S., Kong, X., Kelley, M.C.,  
1719 Sosman, J.A., Johnson, D.B., Ribas, A., Lo, R.S., 2016. Genomic and Transcriptomic  
1720 Features of Response to Anti-PD-1 Therapy in Metastatic Melanoma. *Cell* 165, 35–44.  
1721 <https://doi.org/10.1016/j.cell.2016.02.065>
- 1722 Hutter, C., Zenklusen, J.C., 2018. The Cancer Genome Atlas: Creating Lasting Value beyond Its  
1723 Data. *Cell* 173, 283–285. <https://doi.org/10.1016/j.cell.2018.03.042>
- 1724 Inoue, M., Mimura, K., Izawa, S., Shiraishi, K., Inoue, A., Shiba, S., Watanabe, M., Maruyama,  
1725 T., Kawaguchi, Y., Inoue, S., Kawasaki, T., Choudhury, A., Katoh, R., Fujii, H., Kiessling,  
1726 R., Kono, K., 2012. Expression of mhc class i on breast cancer cells correlates inversely  
1727 with her2 expression. *Oncoimmunology* 1, 1104–1110. <https://doi.org/10.4161/onci.21056>
- 1728 Janiszewska, M., Stein, S., Filho, O.M., Eng, J., Kingston, N.L., Harper, N.W., Rye, I.H.,  
1729 Alečković, M., Trinh, A., Murphy, K.C., Marangoni, E., Cristea, S., Oakes, B., Winer, E.P.,  
1730 Krop, I.E., Russnes, H.G., Spellman, P.T., Bucher, E., Hu, Z., Chin, K., Gray, J.W., Michor,  
1731 F., Polyak, K., 2021. The impact of tumor epithelial and microenvironmental heterogeneity  
1732 on treatment responses in HER2+ breast cancer. *JCI Insight* 6.  
1733 <https://doi.org/10.1172/jci.insight.147617>
- 1734 Jenkins, R.W., Aref, A.R., Lizotte, P.H., Ivanova, E., Stinson, S., Zhou, C.W., Bowden, M.,  
1735 Deng, J., Liu, H., Miao, D., He, M.X., Walker, W., Zhang, G., Tian, T., Cheng, C., Wei, Z.,  
1736 Palakurthi, S., Bittinger, M., Vitzthum, H., Kim, J.W., Merlino, A., Quinn, M.,  
1737 Venkataramani, C., Kaplan, J.A., Portell, A., Gokhale, P.C., Phillips, B., Smart, A., Rotem,  
1738 A., Jones, R.E., Keogh, L., Anguiano, M., Stapleton, L., Jia, Z., Barzily-rokni, M., Cañadas,  
1739 I., Thai, T.C., Hammond, M.R., Vlahos, R., Wang, E.S., Zhang, H., Li, S., Hanna, G.J.,

- 1740 Huang, W., Hoang, M.P., Piris, A., Eliane, J., Stemmer-rachamimov, A.O., Cameron, L.,  
1741 Su, M., Shah, P., Izar, B., Thakuria, M., Leboeuf, N.R., Rabinowits, G., Gunda, V., Parangi,  
1742 S., Barbie, T.U., Sivathanu, V., Wong, J., Richards, W.G., Bueno, R., Yoon, C.H., Miret, J.,  
1743 Herlyn, M., Garraway, L.A., Allen, E.M. Van, Freeman, G.J., Kirschmeier, P.T., Lorch,  
1744 J.H., Ott, P.A., Hodi, F.S., Flaherty, K.T., Kamm, R.D., Boland, G.M., Wong, K., Dornan,  
1745 D., Paweletz, C.P., Barbie, D.A., 2017. Ex Vivo Profiling of PD-1 Blockade Using  
1746 Organotypic Tumor Spheroids. <https://doi.org/10.1158/2159-8290.CD-17-0833>
- 1747 Jeselsohn, R., Cornwell, M., Pun, M., Buchwalter, G., Nguyen, M., Bango, C., Huang, Y.,  
1748 Kuang, Y., Paweletz, C., Fu, X., Nardone, A., Angelis, C. De, Detre, S., Dodson, A.,  
1749 Mohammed, H., Carroll, J.S., Bowden, M., Rao, P., Long, H.W., Li, F., Dowsett, M.,  
1750 Schiff, R., Brown, M., 2017. Embryonic transcription factor SOX9 drives breast cancer  
1751 endocrine resistance. *Proc. Natl. Acad. Sci. U. S. A.* 114, E4482–E4491.  
1752 <https://doi.org/10.1073/pnas.1620993114>
- 1753 Jonas, O., Calligaris, D., Methuku, K.R., Poe, M.M., Francois, J.P., Tranchese, F., Changelian,  
1754 A., Sieghart, W., Ernst, M., Pomeranz Krummel, D.A., Cook, J.M., Pomeroy, S.L., Cima,  
1755 M., Agar, N.Y.R., Langer, R., Sengupta, S., 2016. First in vivo testing of compounds  
1756 targeting group 3 medulloblastomas using an implantable microdevice as a new paradigm  
1757 for drug development. *J. Biomed. Nanotechnol.* 12, 1297–1302.  
1758 <https://doi.org/10.1166/jbn.2016.2262>
- 1759 Jonas, O., Landry, H.M., Fuller, J.E., Santini, J.T., Baselga, J., Tepper, R.I., Cima, M.J., Langer,  
1760 R., 2015. An implantable microdevice to perform high-throughput in vivo drug sensitivity  
1761 testing in tumors. *Sci. Transl. Med.* 7, 284ra57.  
1762 <https://doi.org/10.1126/scitranslmed.3010564>
- 1763 Kashyap, A.S., Schmittnaegel, M., Rigamonti, N., Pais-Ferreira, D., Mueller, P., Buchi, M., Ooi,  
1764 C.-H., Kreuzaler, M., Hirschmann, P., Guichard, A., Rieder, N., Bill, R., Herting, F.,  
1765 Kienast, Y., Dirnhofer, S., Klein, C., Hoves, S., Ries, C.H., Corse, E., De Palma, M.,  
1766 Zippelius, A., 2019. Optimized antiangiogenic reprogramming of the tumor  
1767 microenvironment potentiates CD40 immunotherapy. *Proc. Natl. Acad. Sci. U. S. A.* 117,  
1768 541–551. <https://doi.org/10.1073/pnas.1902145116>
- 1769 Kato, Y., Tabata, K., Kimura, T., Yachie-Kinoshita, A., Ozawa, Y., Yamada, K., Ito, J., Tachino,



- 1770 S., Hori, Y., Matsuki, M., Matsuoka, Y., Ghosh, S., Kitano, H., Nomoto, K., Matsui, J.,  
1771 Funahashi, Y., 2019. Lenvatinib plus anti-PD-1 antibody combination treatment activates  
1772 CD8 + T cells through reduction of tumor-associated macrophage and activation of the  
1773 interferon pathway. *PLoS One* 14, 1–18. <https://doi.org/10.1371/journal.pone.0212513>
- 1774 Kawai, O., Ishii, G., Kubota, K., Murata, Y., Naito, Y., Mizuno, T., Aokage, K., Saijo, N.,  
1775 Nishiwaki, Y., Gemma, A., Kudoh, S., Ochiai, A., 2008. Predominant infiltration of  
1776 macrophages and CD8 + T Cells in cancer nests is a significant predictor of survival in stage  
1777 IV nonsmall cell lung cancer. *Cancer* 113, 1387–1395. <https://doi.org/10.1002/cncr.23712>
- 1778 Kedl, R.M., Lindsay, R.S., Finlon, J.M., Lucas, E.D., Friedman, R.S., Tamburini, B.A.J., 2017.  
1779 Migratory dendritic cells acquire and present lymphatic endothelial cell-archived antigens  
1780 during lymph node contraction. *Nat. Commun.* 8. [https://doi.org/10.1038/s41467-017-](https://doi.org/10.1038/s41467-017-02247-z)  
1781 [02247-z](https://doi.org/10.1038/s41467-017-02247-z)
- 1782 Kerros, C., Tripathi, S.C., Zha, D., Mehrens, J.M., Sergeeva, A., Philips, A. V., Qiao, N., Peters,  
1783 H.L., Katayama, H., Sukhumalchandra, P., Ruisaard, K.E., Perakis, A.A., St John, L.S., Lu,  
1784 S., Mittendorf, E.A., Clise-Dwyer, K., Herrmann, A.C., Alatrash, G., Toniatti, C., Hanash,  
1785 S.M., Ma, Q., Molldrem, J.J., 2017. Neuropilin-1 mediates neutrophil elastase uptake and  
1786 cross-presentation in breast cancer cells. *J. Biol. Chem.* 292, 10295–10305.  
1787 <https://doi.org/10.1074/jbc.M116.773051>
- 1788 Kowal, J., Kornete, M., Joyce, J.A., 2019. Re-education of macrophages as a therapeutic strategy  
1789 in cancer. *Immunotherapy* 11, 677–689. <https://doi.org/10.2217/imt-2018-0156>
- 1790 Kumar, N., Mb, T., Dhesy-Thind Md Msc, S., 2018. CLINICAL PRACTICE GUIDELINES IN  
1791 BREAST CANCER, Kumar Tyagi and Dhesy-Thind Clinical practice guidelines in breast  
1792 cancer ABSTRACT Background A number of clinical practice guidelines (cpgs) concerning  
1793 breast cancer (bca) screening and. *Curr. Oncol.* 25, 151–160.  
1794 <https://doi.org/10.3747/co.25.3729>
- 1795 Lee, H.J., Song, I.H., Park, I.A., Heo, S.-H., Kim, Y.-A., Ahn, J.-H., Gong, G., 2016. Differential  
1796 expression of major histocompatibility complex class I in subtypes of breast cancer is  
1797 associated with estrogen receptor and interferon signaling. *Oncotarget* 7, 30119–30132.  
1798 <https://doi.org/10.18632/oncotarget.8798>



- 1799 Letai, A., 2017. Functional precision cancer medicine-moving beyond pure genomics. *Nat. Med.*  
1800 23, 1028–1035. <https://doi.org/10.1038/nm.4389>
- 1801 Li, A., Keck, J.M., Parmar, S., Patterson, J., Labrie, M., Creason, A.L., Johnson, B.E., Downey,  
1802 M., Thomas, G., Beadling, C., Heiser, L.M., Kolodzie, A., Guimaraes, A.R., Corless, C.L.,  
1803 Gray, J.W., Mills, G.B., Bergan, R.C., Mitri, Z.I., 2021. Characterizing advanced breast  
1804 cancer heterogeneity and treatment resistance through serial biopsies and comprehensive  
1805 analytics. *npj Precis. Oncol.* 5. <https://doi.org/10.1038/s41698-021-00165-4>
- 1806 Lin, A., Loré, K., 2017. Granulocytes: New members of the antigen-presenting cell family.  
1807 *Front. Immunol.* 8, 1–8. <https://doi.org/10.3389/fimmu.2017.01781>
- 1808 Lin, E.Y., Jones, J.G., Li, P., Zhu, L., Whitney, K.D., Muller, W.J., Pollard, J.W., 2003.  
1809 Progression to malignancy in the polyoma middle T oncoprotein mouse breast cancer model  
1810 provides a reliable model for human diseases. Lin, E. Y., Jones, J. G., Li, P., Zhu, L.,  
1811 Whitney, K. D., Muller, W. J., & Pollard, J. W. (2003). Progression to malignan. *Am. J.*  
1812 *Pathol.* 163, 2113–26. [https://doi.org/10.1016/S0002-9440\(10\)63568-7](https://doi.org/10.1016/S0002-9440(10)63568-7)
- 1813 Lin, J.-R., Fallahi-Sichani, M., Sorger, P.K., 2015. Highly multiplexed imaging of single cells  
1814 using a high-throughput cyclic immunofluorescence method. *Nat. Commun.* 6, 8390.  
1815 <https://doi.org/10.1038/ncomms9390>
- 1816 Long, K.B., Gladney, W.L., Tooker, G.M., Graham, K., Fraietta, J.A., Beatty, G.L., 2016. IFN $\gamma$   
1817 and CCL2 cooperate to redirect tumor-infiltrating monocytes to degrade fibrosis and  
1818 enhance chemotherapy efficacy in pancreatic carcinoma. *Cancer Discov.* 6, 400–413.  
1819 <https://doi.org/10.1158/2159-8290.CD-15-1032>
- 1820 Lord, C.J., Ashworth, A., 2017. PARP inhibitors: The First Synthetic Lethal Targeted Therapy.  
1821 *Science* (80-. ). 355, 1152–1158. <https://doi.org/10.1126/science.aam7344>.PARP
- 1822 Luo, N., Nixon, M.J., Gonzalez-ericsson, P.I., Sanchez, V., Opalenik, S.R., Li, H., Zahnnow,  
1823 C.A., Nickels, M.L., Liu, F., Tantawy, M.N., Sanders, M.E., Manning, H.C., Balko, J.M.,  
1824 2018. DNA methyltransferase inhibition upregulates responses in breast cancer. *Nat.*  
1825 *Commun.* 1–11. <https://doi.org/10.1038/s41467-017-02630-w>
- 1826 Ma, Y., Adjemian, S., Mattarollo, S.R., Yamazaki, T., Aymeric, L., Yang, H., Portela Catani,  
1827 J.P., Hannani, D., Duret, H., Steegh, K., Martins, I., Schlemmer, F., Michaud, M., Kepp, O.,

- 1828 Sukkurwala, A.Q., Menger, L., Vacchelli, E., Droin, N., Galluzzi, L., Krzysiek, R., Gordon,  
1829 S., Taylor, P.R., Van Endert, P., Solary, E., Smyth, M.J., Zitvogel, L., Kroemer, G., 2013.  
1830 Anticancer chemotherapy-induced intratumoral recruitment and differentiation of antigen-  
1831 presenting cells. *Immunity* 38, 729–741. <https://doi.org/10.1016/j.immuni.2013.03.003>
- 1832 Matkar, P.N., Singh, K.K., Rudenko, D., Kim, Y.J., Kuliszewski, M.A., Prud'homme, G.J.,  
1833 Hedley, D.W., Leong-Poi, H., 2016. Novel regulatory role of neuropilin-1 in endothelial-to-  
1834 mesenchymal transition and fibrosis in pancreatic ductal adenocarcinoma. *Oncotarget*. 7,  
1835 10. <https://doi.org/10.18632/oncotarget.11060>
- 1836 Md Sakib Hossain, D., Javaid, S., Cai, M., Zhang, C., Sawant, A., Hinton, M., Sathe, M., Grein,  
1837 J., Blumenschein, W., Pinheiro, E.M., Chackerian, A., 2018. Dinaciclib induces  
1838 immunogenic cell death and enhances anti- PD1-mediated tumor suppression. *J. Clin.*  
1839 *Invest.* 128, 644–654. <https://doi.org/10.1172/JCI94586>
- 1840 Mempel, T.R., Bauer, C.A., Pollard, J.W., 2013. *NIH Public Access* 26, 311–327.  
1841 <https://doi.org/10.1007/s10585-008-9196-9>. INTRAVITAL
- 1842 Montero, J., Letai, A., 2018. Why do BCL-2 inhibitors work and where should we use them in  
1843 the clinic? *Cell Death Differ.* 25, 56–64. <https://doi.org/10.1038/cdd.2017.183>
- 1844 Norazmi, M.N., Hohmann, A.W., Skinner, J.M., Bradley, J., 1989. Expression of MHC class II,  
1845 interleukin 2 receptor and CD45 antigens on tumour-associated t lymphocytes in colonic  
1846 carcinoma. *Br. J. Cancer* 60, 685–687. <https://doi.org/10.1038/bjc.1989.340>
- 1847 Obeid, M., Tesniere, A., Ghiringhelli, F., Fimia, G.M., Apetoh, L., Perfettini, J.L., Castedo, M.,  
1848 Mignot, G., Panaretakis, T., Casares, N., Métivier, D., Larochette, N., Van Endert, P.,  
1849 Ciccocanti, F., Piacentini, M., Zitvogel, L., Kroemer, G., 2007. Calreticulin exposure  
1850 dictates the immunogenicity of cancer cell death. *Nat. Med.* 13, 54–61.  
1851 <https://doi.org/10.1038/nm1523>
- 1852 Oehler, L., Majdic, O., Pickl, W.F., Stöckl, J., Riedl, E., Drach, J., Rappersberger, K., Geissler,  
1853 K., Knapp, W., 1998. Neutrophil granulocyte-committed cells can be driven to acquire  
1854 dendritic cell characteristics. *J. Exp. Med.* 187, 1019–1028.  
1855 <https://doi.org/10.1084/jem.187.7.1019>
- 1856 Overacre-Delgoffe, A.E., Chikina, M., Dadey, R.E., Yano, H., Brunazzi, E.A., Shayan, G.,

- 1857 Horne, W., Moskovitz, J.M., Kolls, J.K., Sander, C., Shuai, Y., Normolle, D.P., Kirkwood,  
1858 J.M., Ferris, R.L., Delgoffe, G.M., Bruno, T.C., Workman, C.J., Vignali, D.A.A., 2017.  
1859 Interferon- $\gamma$  Drives TregFragility to Promote Anti-tumor Immunity. *Cell* 169, 1130-  
1860 1141.e11. <https://doi.org/10.1016/j.cell.2017.05.005>
- 1861 Palucka, A.K., Coussens, L.M., 2016. The Basis of Oncoimmunology. *Cell* 164, 1233–1247.  
1862 <https://doi.org/10.1016/j.cell.2016.01.049>
- 1863 Patnaik, A., Swanson, K.D., Csizmadia, E., Solanki, A., Landon-Brace, N., Gehring, M.P.,  
1864 Helenius, K., Olson, B.M., Pyzer, A.R., Wang, L.C., Elemento, O., Novak, J., Thornley,  
1865 T.B., Asara, J.M., Montaser, L., Timmons, J.J., Morgan, T.M., Wang, Y., Levantini, E.,  
1866 Clohessy, J.G., Kelly, K., Pandolfi, P.P., Rosenblatt, J.M., Avigan, D.E., Ye, H., Karp, J.M.,  
1867 Signoretti, S., Balk, S.P., Cantley, L.C., 2017. Cabozantinib eradicates advanced murine  
1868 prostate cancer by activating antitumor innate immunity. *Cancer Discov.* 7, 750–765.  
1869 <https://doi.org/10.1158/2159-8290.CD-16-0778>
- 1870 Pham, N.A., Morrison, A., Schwock, J., Aviel-Ronen, S., Lakovlev, V., Tsao, M.S., Ho, J.,  
1871 Hedley, D.W., 2007. Quantitative image analysis of immunohistochemical stains using a  
1872 CMYK color model. *Diagn. Pathol.* 2, 1–10. <https://doi.org/10.1186/1746-1596-2-8>
- 1873 Radsak, M., Iking-Konert, C., Stegmaier, S., Andrassy, K., Hänsch, G.M., 2000.  
1874 Polymorphonuclear neutrophils as accessory cells for T-cell activation: Major  
1875 histocompatibility complex class II restricted antigen-dependent induction of T-cell  
1876 proliferation. *Immunology* 101, 521–530. <https://doi.org/10.1046/j.1365-2567.2000.00140.x>
- 1877 Raghavan, M., Wijeyesakere, S.J., Peters, L.R., Del Cid, N., 2013. Calreticulin in the immune  
1878 system: Ins and outs. *Trends Immunol.* 34, 13–21. <https://doi.org/10.1016/j.it.2012.08.002>
- 1879 Reis E Sousa, C., 2006. Dendritic cells in a mature age. *Nat. Rev. Immunol.* 6, 476–483.  
1880 <https://doi.org/10.1038/nri1845>
- 1881 Robert, C., 2020. A decade of immune-checkpoint inhibitors in cancer therapy. *Nat. Commun.*  
1882 11, 10–12. <https://doi.org/10.1038/s41467-020-17670-y>
- 1883 Rodriguez, P.C., Ochoa, A.C., Al-Khami, A.A., 2017. Arginine metabolism in myeloid cells  
1884 shapes innate and adaptive immunity. *Front. Immunol.* 8.  
1885 <https://doi.org/10.3389/fimmu.2017.00093>

1886 Rozenblatt-Rosen, O., Regev, A., Oberdoerffer, P., Nawy, T., Hupalowska, A., Rood, J.E.,  
1887 Ashenberg, O., Cerami, E., Coffey, R.J., Demir, E., Ding, L., Esplin, E.D., Ford, J.M.,  
1888 Goecks, J., Ghosh, S., Gray, J.W., Guinney, J., Hanlon, S.E., Hughes, S.K., Hwang, E.S.,  
1889 Iacobuzio-Donahue, C.A., Jané-Valbuena, J., Johnson, Bruce E., Lau, K.S., Lively, T.,  
1890 Mazzilli, S.A., Pe'er, D., Santagata, S., Shalek, A.K., Schapiro, D., Snyder, M.P., Sorger,  
1891 P.K., Spira, A.E., Srivastava, S., Tan, K., West, R.B., Williams, E.H., Aberle, D., Achilefu,  
1892 S.I., Ademuyiwa, F.O., Adey, A.C., Aft, R.L., Agarwal, R., Aguilar, R.A., Alikarami, F.,  
1893 Allaj, V., Amos, C., Anders, R.A., Angelo, M.R., Anton, K., Aster, J.C., Babur, O.,  
1894 Bahmani, A., Balsubramani, A., Barrett, D., Beane, J., Bender, D.E., Bernt, K., Berry, L.,  
1895 Betts, C.B., Bletz, J., Blise, K., Boire, A., Boland, G., Borowsky, A., Bosse, K., Bott, M.,  
1896 Boyden, E., Brooks, J., Bueno, R., Burlingame, E.A., Cai, Q., Campbell, J., Caravan, W.,  
1897 Chaib, H., Chan, J.M., Chang, Y.H., Chatterjee, D., Chaudhary, O., Chen, A.A., Chen, B.,  
1898 Chen, Changya, Chen, Chia hui, Chen, F., Chen, Y.A., Chheda, M.G., Chin, K., Chiu, R.,  
1899 Chu, S.K., Chuaqui, R., Chun, J., Cisneros, L., Colditz, G.A., Cole, K., Collins, N.,  
1900 Contrepois, K., Coussens, L.M., Creason, A.L., Crichton, D., Curtis, C., Davidsen, T.,  
1901 Davies, S.R., de Bruijn, I., Dellostritto, L., De Marzo, A., DeNardo, D.G., Diep, D., Diskin,  
1902 S., Doan, X., Drewes, J., Dubinett, S., Dyer, M., Egger, J., Eng, J., Engelhardt, B., Erwin,  
1903 G., Esserman, L., Felmeister, A., Feiler, H.S., Fields, R.C., Fisher, S., Flaherty, K.,  
1904 Flournoy, J., Fortunato, A., Frangieh, A., Frye, J.L., Fulton, R.S., Galipeau, D., Gan, S.,  
1905 Gao, J., Gao, L., Gao, P., Gao, V.R., Geiger, T., George, A., Getz, G., Giannakis, M.,  
1906 Gibbs, D.L., Gillanders, W.E., Goedegebuure, S.P., Gould, A., Gowers, K., Greenleaf, W.,  
1907 Gresham, J., Guerriero, J.L., Guha, T.K., Guimaraes, A.R., Gutman, D., Hacohen, N.,  
1908 Hanlon, S., Hansen, C.R., Harismendy, O., Harris, K.A., Hata, A., Hayashi, A., Heiser, C.,  
1909 Helvie, K., Herndon, J.M., Hirst, G., Hodi, F., Hollmann, T., Horning, A., Hsieh, J.J.,  
1910 Hughes, S., Huh, W.J., Hunger, S., Hwang, S.E., Ijaz, H., Izar, B., Jacobson, C.A., Janes, S.,  
1911 Jayasinghe, R.G., Jiang, L., Johnson, Brett E., Johnson, B., Ju, T., Kadara, H., Kaestner, K.,  
1912 Kagan, J., Kalinke, L., Keith, R., Khan, A., Kibbe, W., Kim, A.H., Kim, E., Kim, J.,  
1913 Kolodzie, A., Kopytra, M., Kotler, E., Krueger, R., Krysan, K., Kundaje, A., Ladabaum, U.,  
1914 Lake, B.B., Lam, H., Laquindanum, R., Laughney, A.M., Lee, H., Lenburg, M., Leonard,  
1915 C., Leshchiner, I., Levy, R., Li, J., Lian, C.G., Lim, K.H., Lin, J.R., Lin, Y., Liu, Q., Liu, R.,  
1916 Longabaugh, W.J.R., Longacre, T., Ma, C.X., Macedonia, M.C., Madison, T., Maher, C.A.,

- 1917 Maitra, A., Makinen, N., Makowski, D., Maley, C., Maliga, Z., Mallo, D., Maris, J.,  
1918 Markham, N., Marks, J., Martinez, D., Mashl, R.J., Masilionais, I., Mason, J., Massagué, J.,  
1919 Massion, P., Mattar, M., Mazurchuk, R., Mazutis, L., McKinley, E.T., McMichael, J.F.,  
1920 Merrick, D., Meyerson, M., Miessner, J.R., Mills, G.B., Mills, M., Mondal, S.B., Mori, M.,  
1921 Mori, Y., Moses, E., Mosse, Y., Muhlich, J.L., Murphy, G.F., Navin, N.E., Nederlof, M.,  
1922 Ness, R., Nevins, S., Nikolov, M., Nirmal, A.J., Nolan, G., Novikov, E., O'Connell, B.,  
1923 Offin, M., Oh, S.T., Olson, A., Ooms, A., Ossandon, M., Owzar, K., Parmar, S., Patel, T.,  
1924 Patti, G.J., Pe'er, I., Peng, T., Persson, D., Petty, M., Pfister, H., Polyak, K., Pourfarhangi,  
1925 K., Puram, S. V., Qiu, Q., Quintanal-Villalonga, Á., Raj, A., Ramirez-Solano, M., Rashid,  
1926 R., Reeb, A.N., Reid, M., Resnick, A., Reynolds, S.M., Riesterer, J.L., Rodig, S., Roland,  
1927 J.T., Rosenfield, S., Rotem, A., Roy, S., Rudin, C.M., Ryser, M.D., Santi-Vicini, M., Sato,  
1928 K., Schrag, D., Schultz, N., Sears, C.L., Sears, R.C., Sen, S., Sen, T., Shalek, A., Sheng, J.,  
1929 Sheng, Q., Shoghi, K.I., Shrubsole, M.J., Shyr, Y., Sibley, A.B., Siex, K., Simmons, A.J.,  
1930 Singer, D.S., Sivagnanam, S., Slyper, M., Sokolov, A., Song, S.K., Southard-Smith, A.,  
1931 Spira, A., Stein, J., Storm, P., Stover, E., Strand, S.H., Su, T., Sudar, D., Sullivan, R.,  
1932 Surrey, L., Suvà, M., Terekhanova, N. V., Ternes, L., Thammavong, L., Thibault, G.,  
1933 Thomas, G. V., Thorsson, V., Todres, E., Tran, L., Tyler, M., Uzun, Y., Vachani, A., Van  
1934 Allen, E., Vandekar, S., Veis, D.J., Vigneau, S., Vossough, A., Waanders, A., Wagle, N.,  
1935 Wang, L.B., Wendl, M.C., West, R., Wu, C. yun, Wu, H., Wu, H.Y., Wyczalkowski, M.A.,  
1936 Xie, Y., Yang, X., Yapp, C., Yu, W., Yuan, Y., Zhang, D., Zhang, K., Zhang, M., Zhang,  
1937 N., Zhang, Y., Zhao, Y., Zhou, D.C., Zhou, Z., Zhu, H., Zhu, Q., Zhu, X., Zhu, Y., Zhuang,  
1938 X., 2020. The Human Tumor Atlas Network: Charting Tumor Transitions across Space and  
1939 Time at Single-Cell Resolution. *Cell* 181, 236–249.  
1940 <https://doi.org/10.1016/j.cell.2020.03.053>
- 1941 Sahai, E., Astsaturov, I., Cukierman, E., DeNardo, D.G., Egeblad, M., Evans, R.M., Fearon, D.,  
1942 Greten, F.R., Hingorani, S.R., Hunter, T., Hynes, R.O., Jain, R.K., Janowitz, T., Jorgensen,  
1943 C., Kimmelman, A.C., Kolonin, M.G., Maki, R.G., Powers, R.S., Puré, E., Ramirez, D.C.,  
1944 Scherz-Shouval, R., Sherman, M.H., Stewart, S., Tlsty, T.D., Tuveson, D.A., Watt, F.M.,  
1945 Weaver, V., Weeraratna, A.T., Werb, Z., 2020. A framework for advancing our  
1946 understanding of cancer-associated fibroblasts. *Nat. Rev. Cancer* 20, 174–186.  
1947 <https://doi.org/10.1038/s41568-019-0238-1>

- 1948 Schneider, C. a, Rasband, W.S., Eliceiri, K.W., 2012. NIH Image to ImageJ: 25 years of image  
1949 analysis. *Nat. Methods* 9, 671–675. <https://doi.org/10.1038/nmeth.2089>
- 1950 Shaul, M.E., Levy, L., Sun, J., Mishalian, I., Singhal, S., Kapoor, V., Horng, W., Fridlender, G.,  
1951 Albelda, S.M., Fridlender, Z.G., 2016. Tumor-associated neutrophils display a distinct N1  
1952 profile following TGF $\beta$  modulation: A transcriptomics analysis of pro- vs. antitumor TANs.  
1953 *Oncoimmunology* 5, 1–14. <https://doi.org/10.1080/2162402X.2016.1232221>
- 1954 Sophie Mokas, J.R.M., Cristina Garreau, M.-J., Fournier, 'e, Robert, F., Arya, P., Kaufman, R.J.,  
1955 Pelletier, J., Mazroui\*, and R., 2009. Uncoupling Stress Granule Assembly and Translation  
1956 Initiation Inhibition. *Mol. Biol. Cell* 20, 2673–2683. <https://doi.org/10.1091/mbc.E08>
- 1957 Sotomayor, E.M., Borrello, I., Tubb, E., Rattis, F.M., Bien, H., Lu, Z., Fein, S., Schoenberger,  
1958 S., Levitsky, H.I., 1999. Conversion of tumor-specific CD4+ T-cell tolerance to T-cell  
1959 priming through in vivo ligation of cd40. *Nat. Med.* 5, 780–787.  
1960 <https://doi.org/10.1038/10503>
- 1961 Tatárová, Z., Abbuehl, J.P., Maerkl, S., Huelsken, J., 2016. Microfluidic co-culture platform to  
1962 quantify chemotaxis of primary stem cells. *Lab Chip* 1–8.  
1963 <https://doi.org/10.1039/C6LC00236F>
- 1964 Tsujikawa, T., Kumar, S., Borkar, R.N., Azimi, V., Thibault, G., Chang, Y.H., Balter, A.,  
1965 Kawashima, R., Choe, G., Sauer, D., El Rassi, E., Clayburgh, D.R., Kulesz-Martin, M.F.,  
1966 Lutz, E.R., Zheng, L., Jaffee, E.M., Leyschok, P., Margolin, A.A., Mori, M., Gray, J.W.,  
1967 Flint, P.W., Coussens, L.M., 2017. Quantitative Multiplex Immunohistochemistry Reveals  
1968 Myeloid-Inflamed Tumor-Immune Complexity Associated with Poor Prognosis. *Cell Rep.*  
1969 19, 203–217. <https://doi.org/10.1016/j.celrep.2017.03.037>
- 1970 Turpin, J., Ling, C., Crosby, E.J., Hartman, Z.C., Simond, A.M., Chodosh, L.A., Rennhack, J.P.,  
1971 Andrechek, E.R., Ozelik, J., Hallett, M., Mills, G.B., Cardiff, R.D., Gray, J.W., Griffith,  
1972 O.L., Muller, W.J., 2016. The ErbB2 $\Delta$ Ex16 splice variant is a major oncogenic driver in  
1973 breast cancer that promotes a pro-metastatic tumor microenvironment. *Oncogene* 1–12.  
1974 <https://doi.org/10.1038/onc.2016.129>
- 1975 Van Mierlo, G.J.D., Boer, A.T. Den, Medema, J.P., Van Der Voort, E.I.H., Fransen, M.F.,  
1976 Offringa, R., Melief, C.J.M., Toes, R.E.M., 2002. CD40 stimulation leads to effective



- 1977 therapy of CD40- tumors through induction of strong systemic cytotoxic T lymphocyte  
1978 immunity. *Proc. Natl. Acad. Sci. U. S. A.* 99, 5561–5566.  
1979 <https://doi.org/10.1073/pnas.082107699>
- 1980 Verreck, F.A.W., de Boer, T., Langenberg, D.M.L., van der Zanden, L., Ottenhoff, T.H.M.,  
1981 2006. Phenotypic and functional profiling of human proinflammatory type-1 and anti-  
1982 inflammatory type-2 macrophages in response to microbial antigens and IFN- $\gamma$ - and  
1983 CD40L-mediated costimulation. *J. Leukoc. Biol.* 79, 285–293.  
1984 <https://doi.org/10.1189/jlb.0105015>
- 1985 Vonderheide, R.H., 2018. The Immune Revolution: A Case for Priming, Not Checkpoint. *Cancer*  
1986 *Cell* 33, 563–569. <https://doi.org/10.1016/j.ccell.2018.03.008>
- 1987 Wang, Yujie, Wang, Yuyang, Fan, X., Song, J., Wu, H., Han, J., Lu, L., Weng, X., Nie, G.,  
1988 2018. ABT-199-mediated inhibition of Bcl-2 as a potential therapeutic strategy for  
1989 nasopharyngeal carcinoma. *Biochem. Biophys. Res. Commun.* 503, 1214–1220.  
1990 <https://doi.org/10.1016/j.bbrc.2018.07.027>
- 1991 Watson, S.S., Dane, M., Chin, K., Jonas, O., Gray, J.W., Korkola, J.E., Watson, S.S., Dane, M.,  
1992 Chin, K., Tatarova, Z., Liu, M., Liby, T., Thompson, W., 2018. Microenvironment-  
1993 Mediated Mechanisms of Resistance to HER2 Inhibitors Differ between HER2 + Breast  
1994 Cancer Subtypes Article Microenvironment-Mediated Mechanisms of Resistance to HER2  
1995 Inhibitors Differ between HER2 + Breast Cancer Subtypes. *Cell Syst.* 1–14.  
1996 <https://doi.org/10.1016/j.cels.2018.02.001>
- 1997 Whittle, J.R., Vaillant, F., Surgenor, E., Policheni, A.N., Giner, G., Capaldo, B.D., Chen, H.-R.,  
1998 Liu, H.K., Dekkers, J.F., Sachs, N., Clevers, H., Fellowes, A., Green, T., Xu, H., Fox, S.B.,  
1999 Herold, M.J., Smyth, G.K., Gray, D.H.D., Visvader, J.E., Lindeman, G.J., 2020. Dual  
2000 Targeting of CDK4/6 and BCL2 Pathways Augments Tumor Response in Estrogen  
2001 Receptor–Positive Breast Cancer. *Clin. Cancer Res.* 1–16. [https://doi.org/10.1158/1078-](https://doi.org/10.1158/1078-0432.ccr-19-1872)  
2002 [0432.ccr-19-1872](https://doi.org/10.1158/1078-0432.ccr-19-1872)
- 2003 Xue, Y., Lai, L., Lian, W., Tu, X., Zhou, J., Dong, P., Su, D., Wang, X., Cao, X., Chen, Y.,  
2004 Wang, Q., 2019. SOX9/FXYD3/Src Axis Is Critical for ER + Breast Cancer Stem Cell  
2005 Function . *Mol. Cancer Res.* 17, 238–249. <https://doi.org/10.1158/1541-7786.mcr-18-0610>

- 2006 Yang, L., Froio, R.M., Sciuto, T.E., Dvorak, A.M., Alon, R., Luscinskas, F.W., 2005. ICAM-1  
2007 regulates neutrophil adhesion and transcellular migration of TNF- $\alpha$ -activated vascular  
2008 endothelium under flow. *Blood* 106, 584–592. <https://doi.org/10.1182/blood-2004-12-4942>
- 2009 Yang, Y., Yang, H.H., Hu, Y., Watson, P.H., Liu, H., Geiger, T.R., Anver, M.R., Haines, D.C.,  
2010 Martin, P., Green, J.E., Lee, M.P., Hunter, K.W., Wakefield, L.M., Yang, Y., Yang, H.H.,  
2011 Hu, Y., Watson, P.H., Liu, H., Geiger, T.R., Anver, M.R., Haines, D.C., Martin, P., Green,  
2012 J.E., Lee, M.P., Hunter, K.W., Wakefield, L.M., 2017. Immunocompetent mouse allograft  
2013 models for development of therapies to target breast cancer metastasis. *Oncotarget* 8,  
2014 30621–30643. <https://doi.org/10.18632/oncotarget.15695>
- 2015 Yatim, N., Cullen, S., Albert, M.L., 2017. Dying cells actively regulate adaptive immune  
2016 responses. *Nat. Rev. Immunol.* 17, 262–275. <https://doi.org/10.1038/nri.2017.9>
- 2017 Yuki, K., Cheng, N., Nakano, M., Kuo, C.J., 2020. Organoid Models of Tumor Immunology.  
2018 *Trends Immunol.* 41, 652–664. <https://doi.org/10.1016/j.it.2020.06.010>
- 2019



## Figure 2

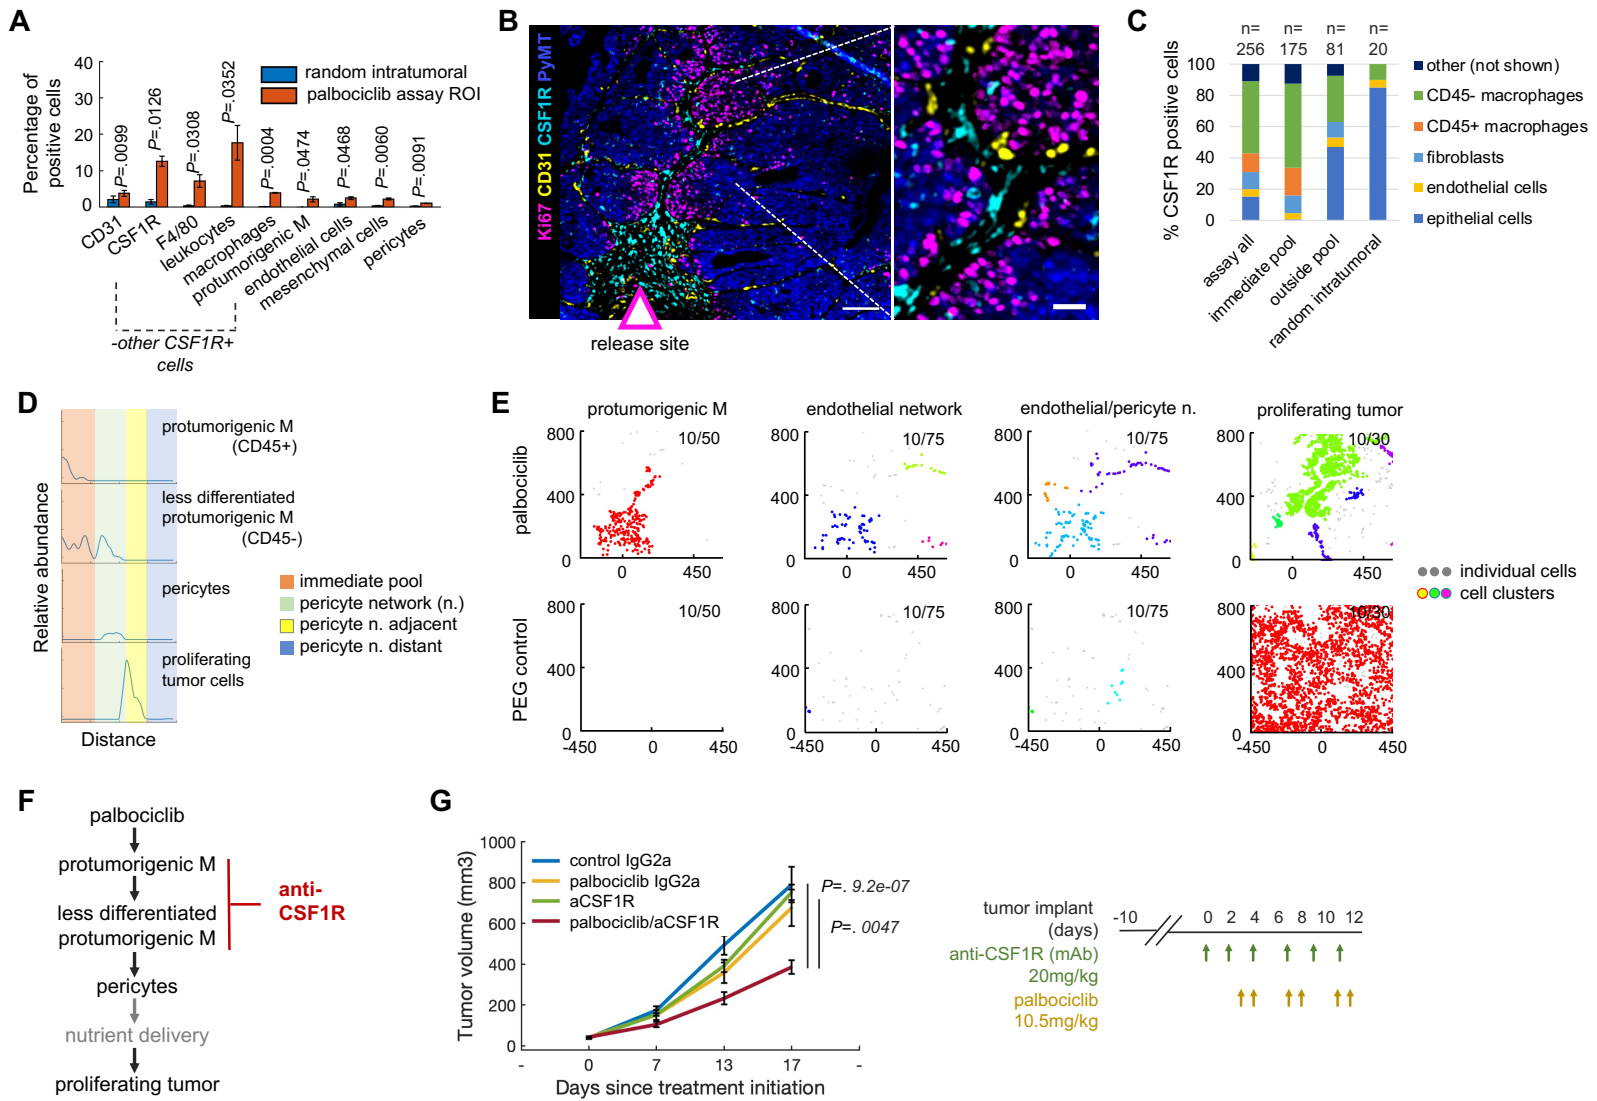

# Figure 3

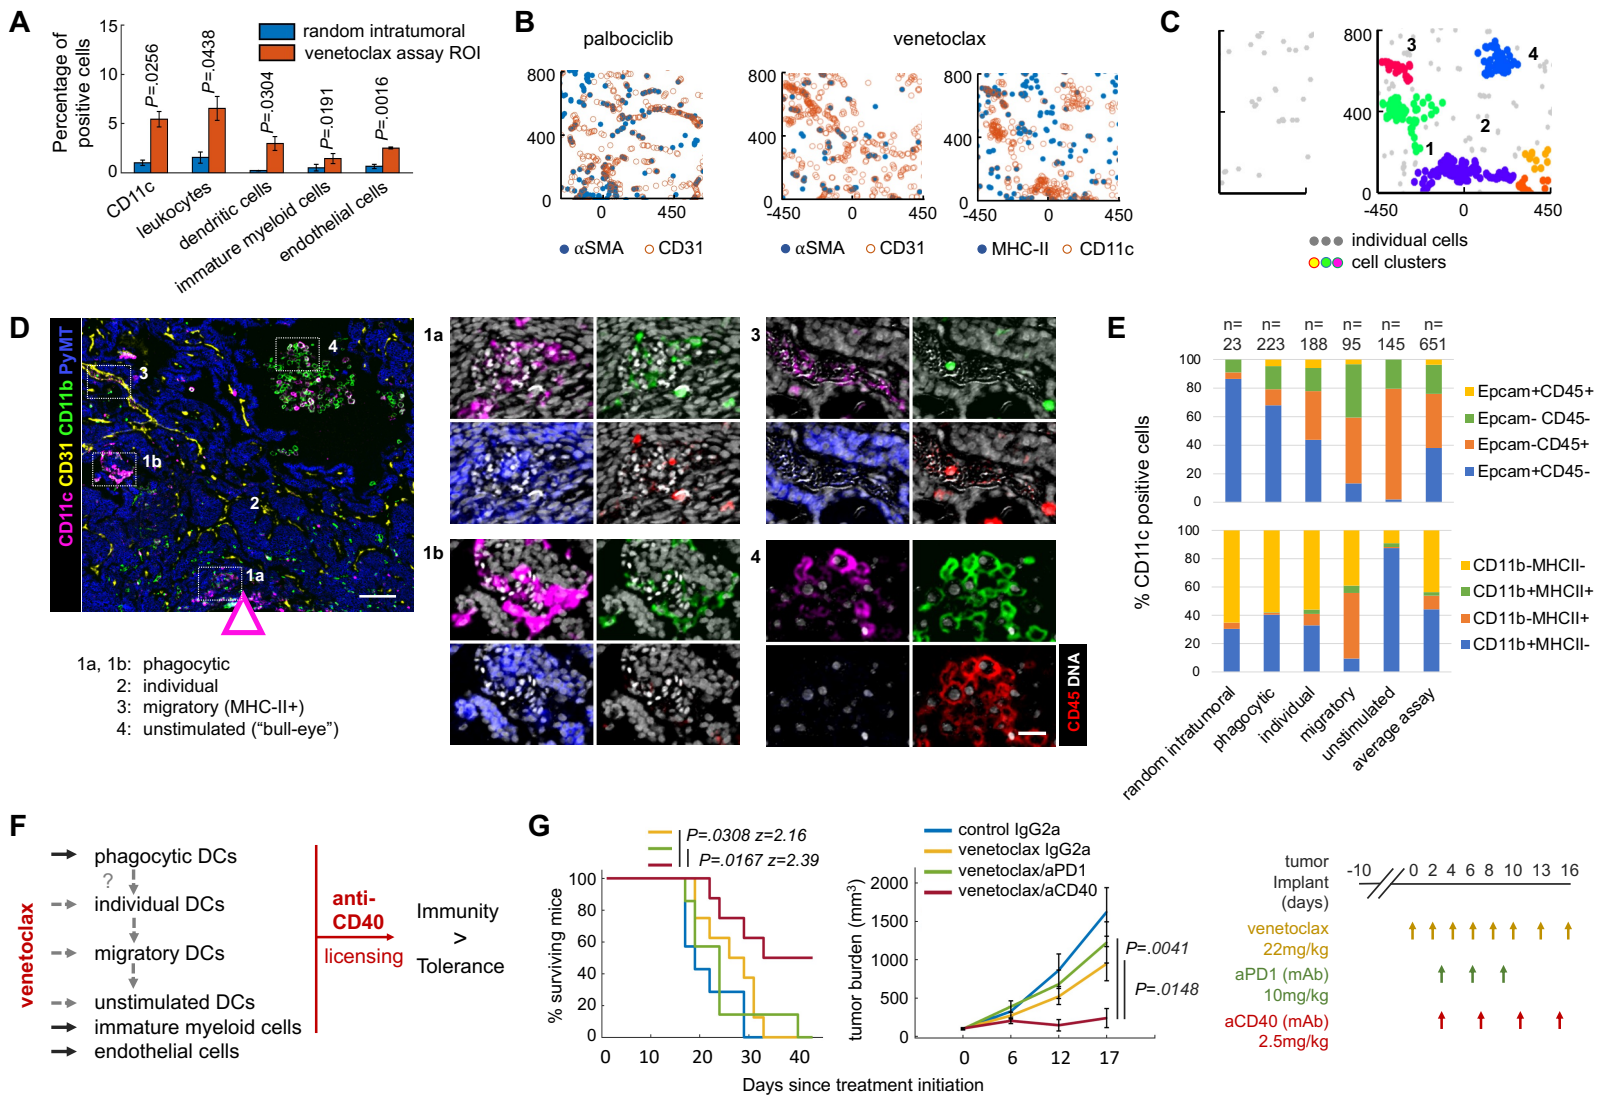



# Figure 4

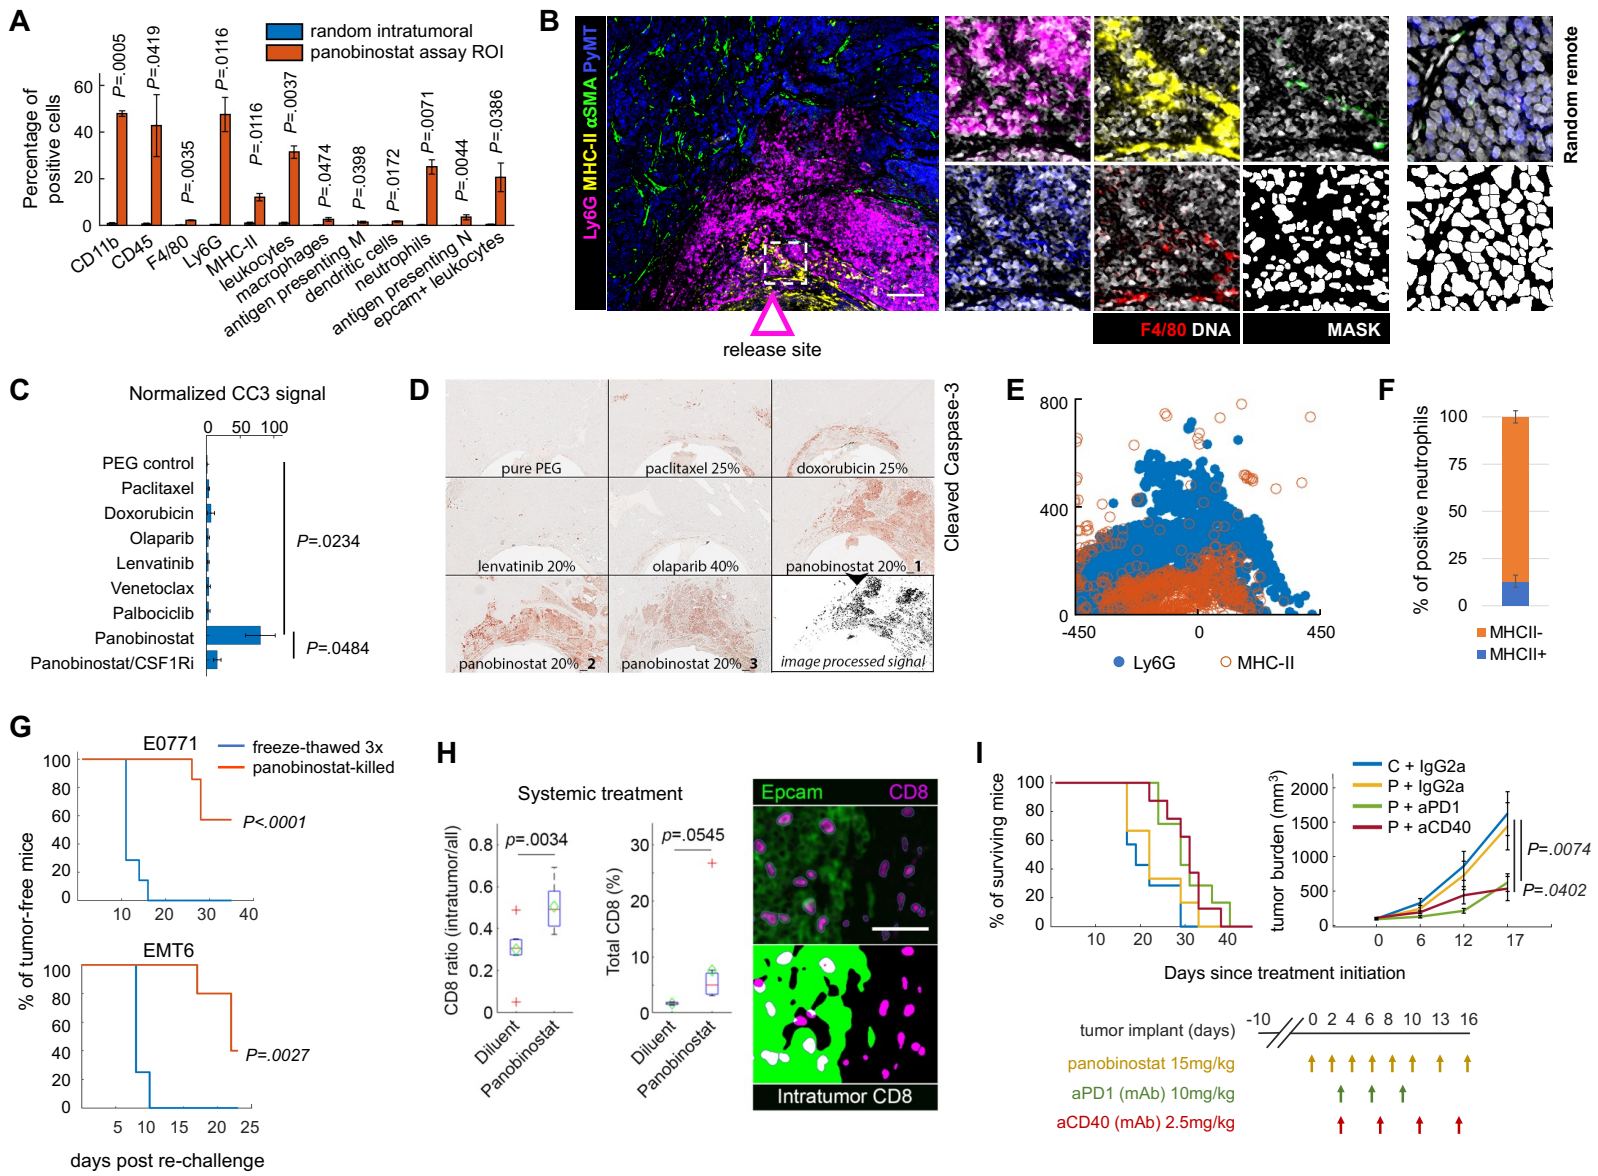



# Figure 5

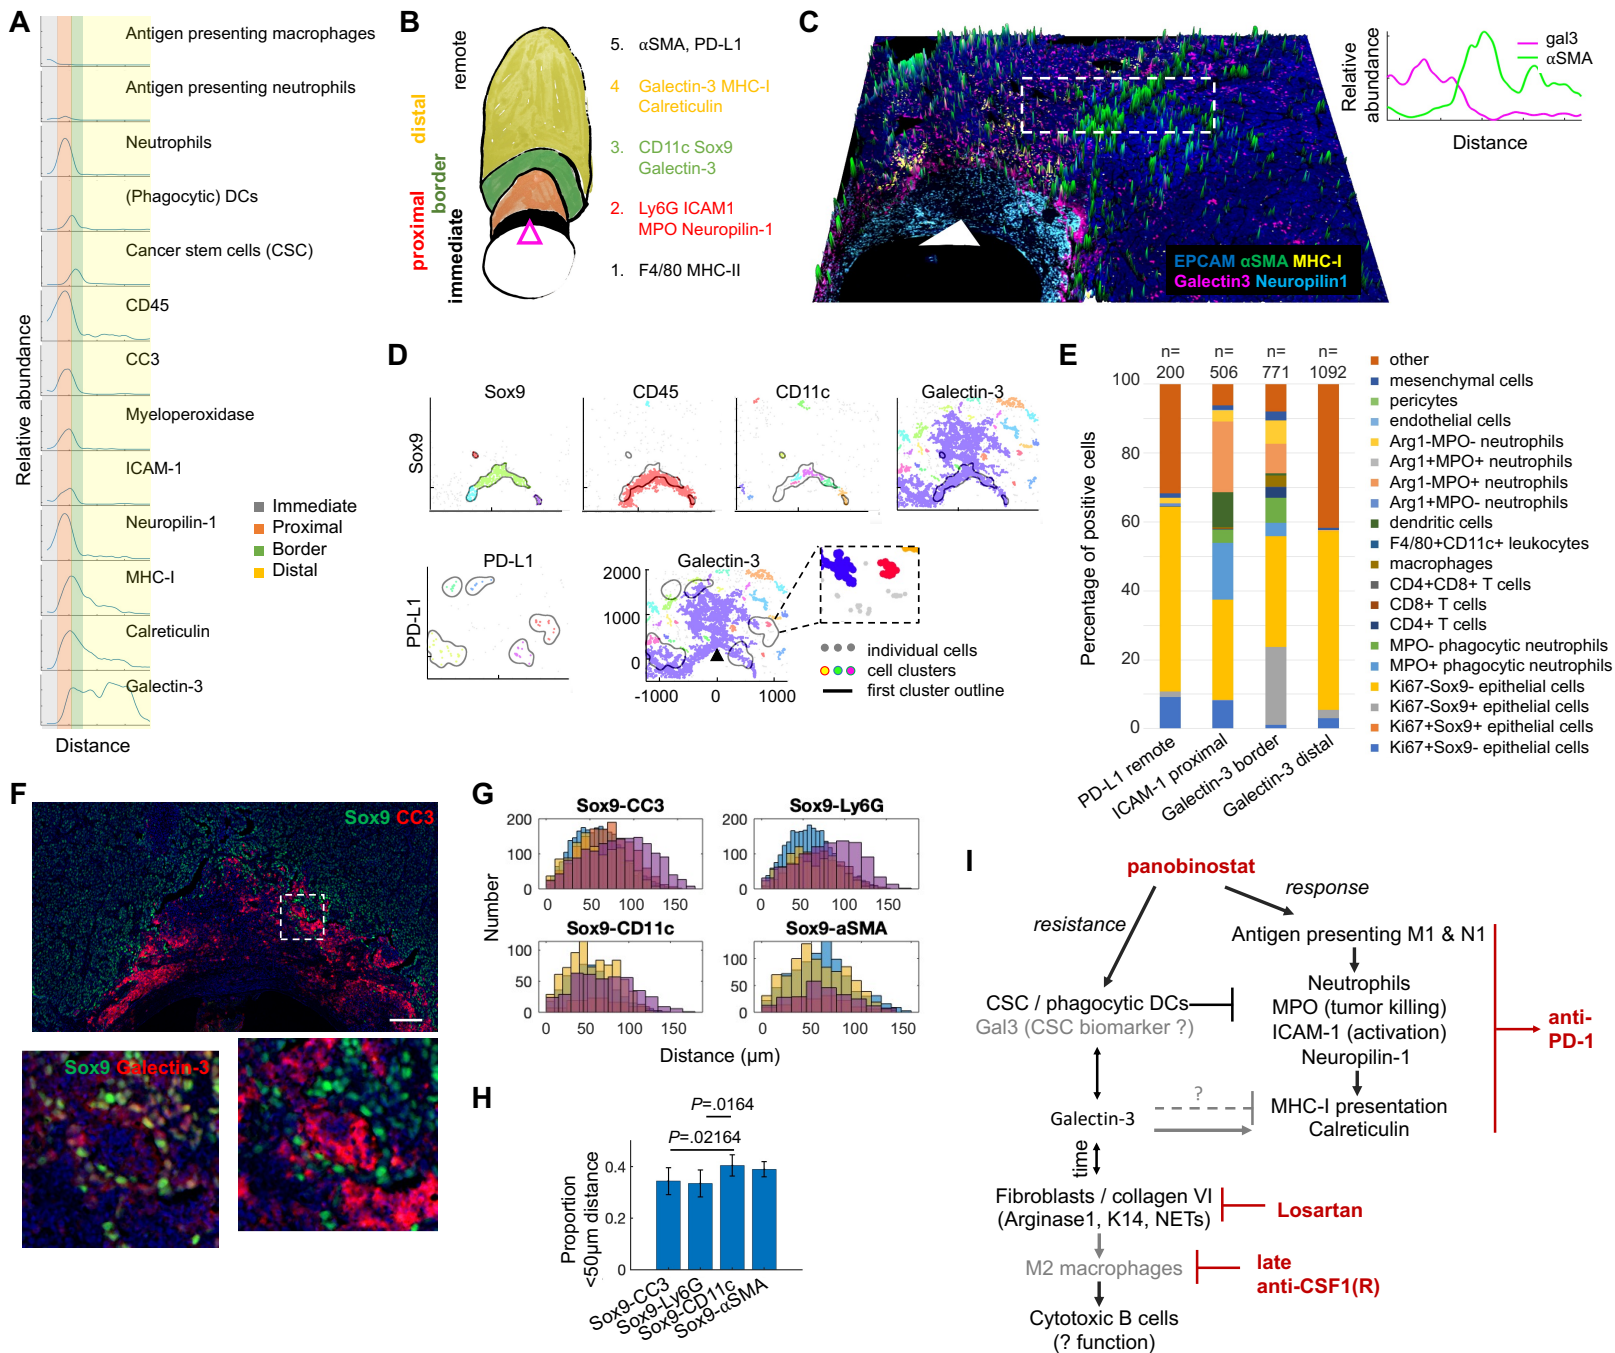

# Figure 6

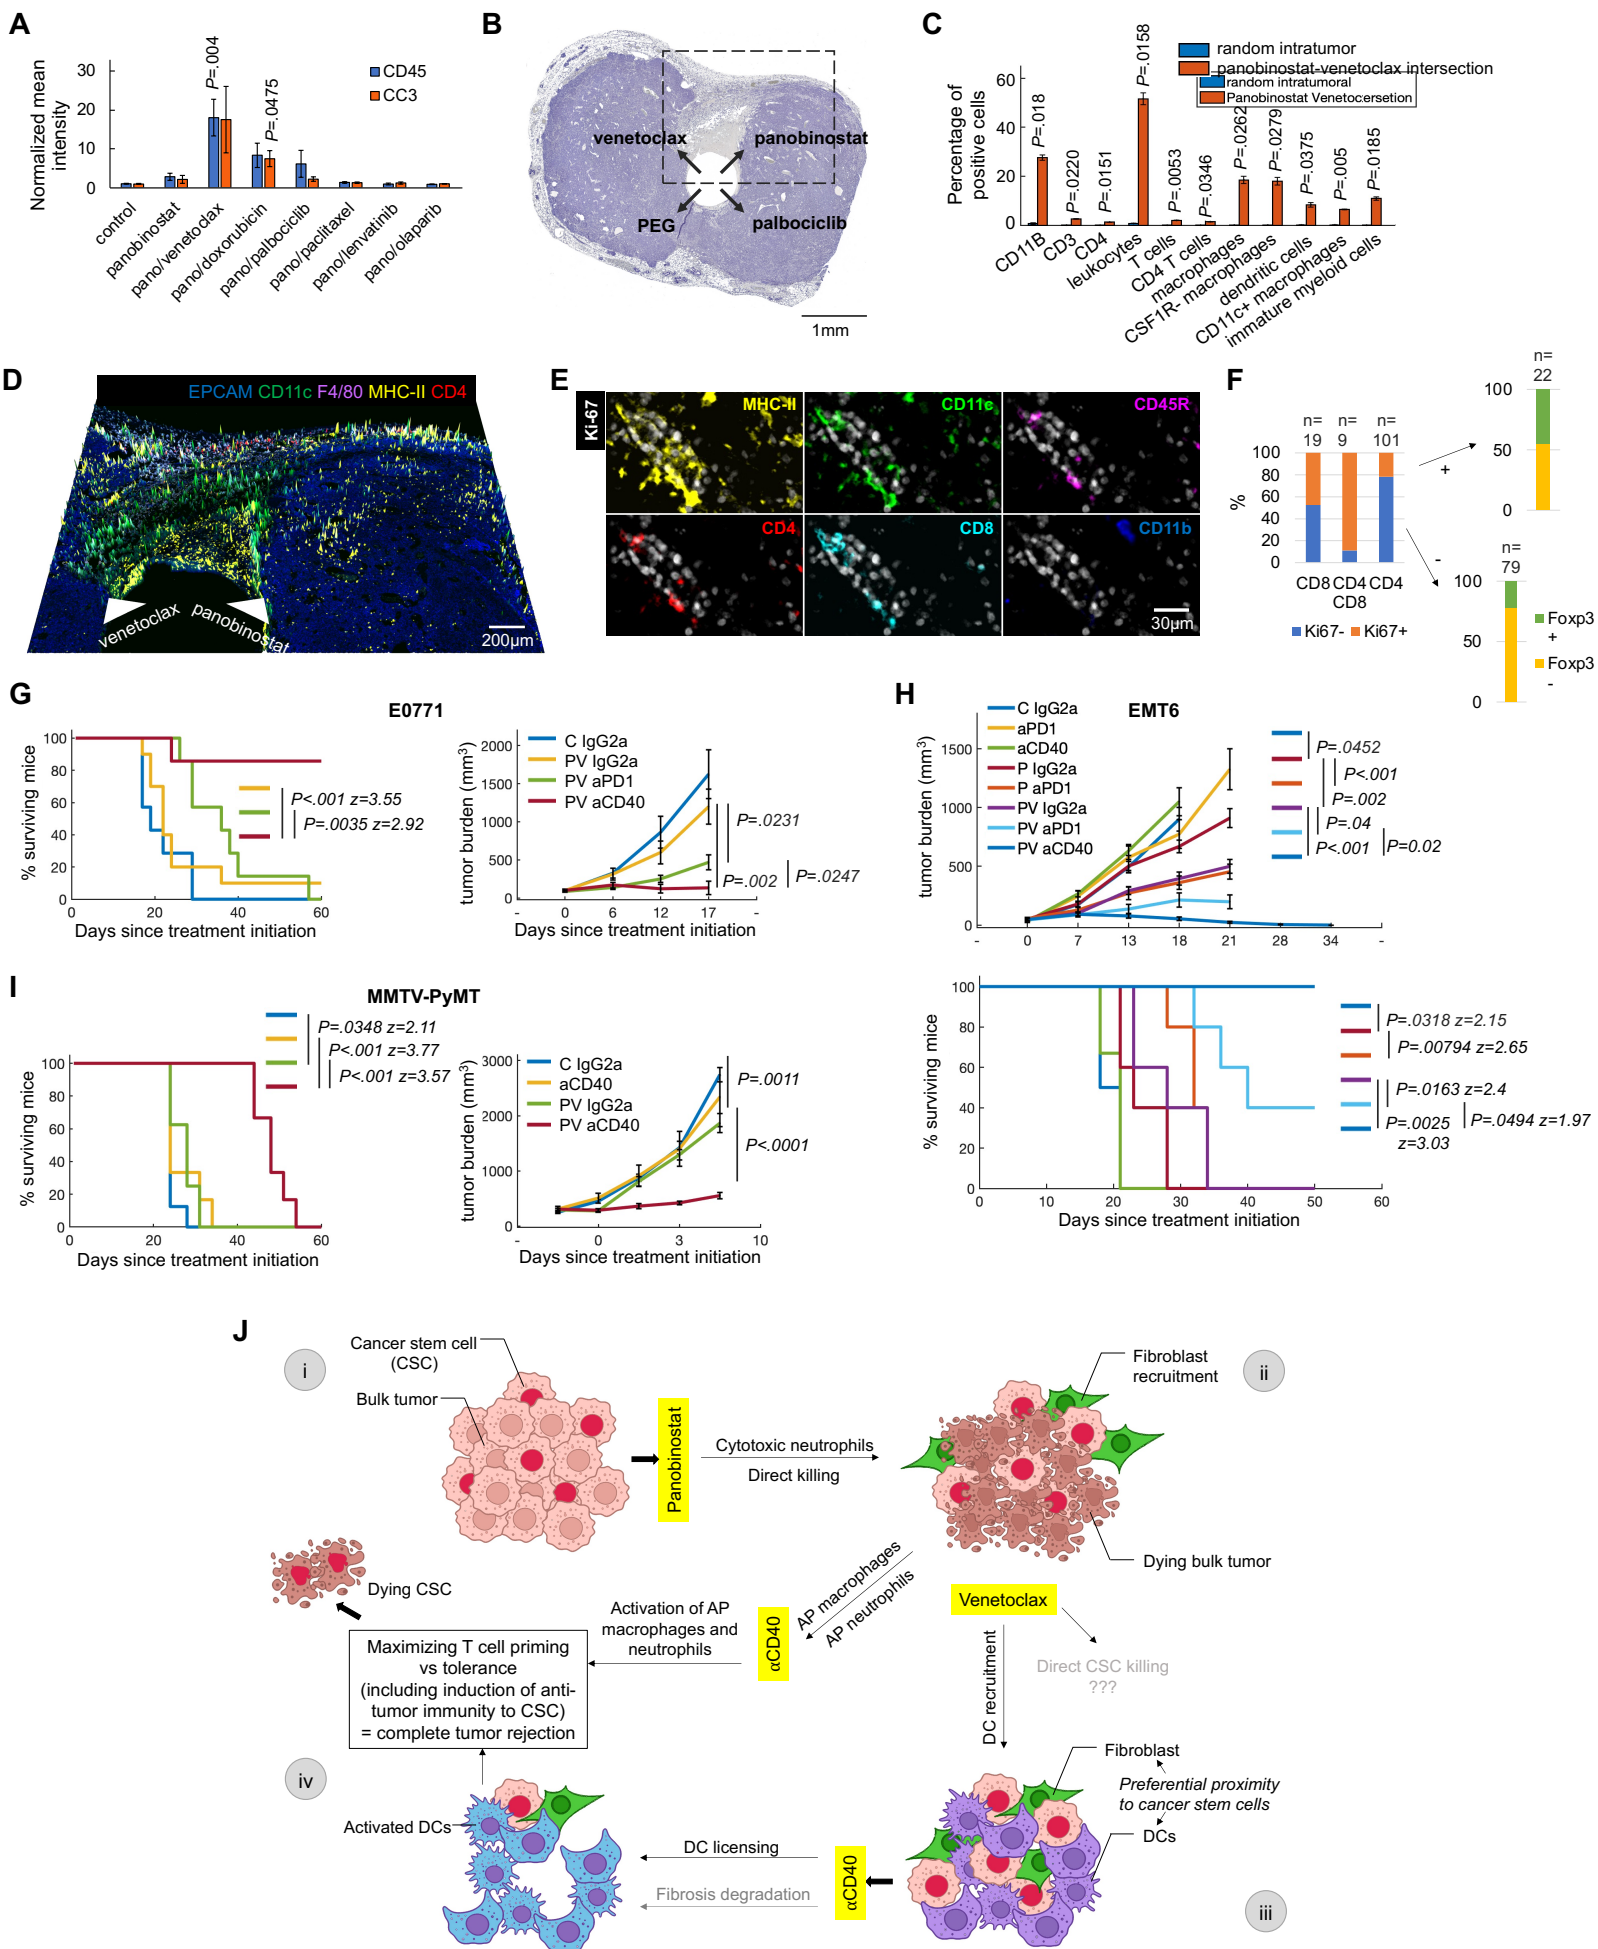



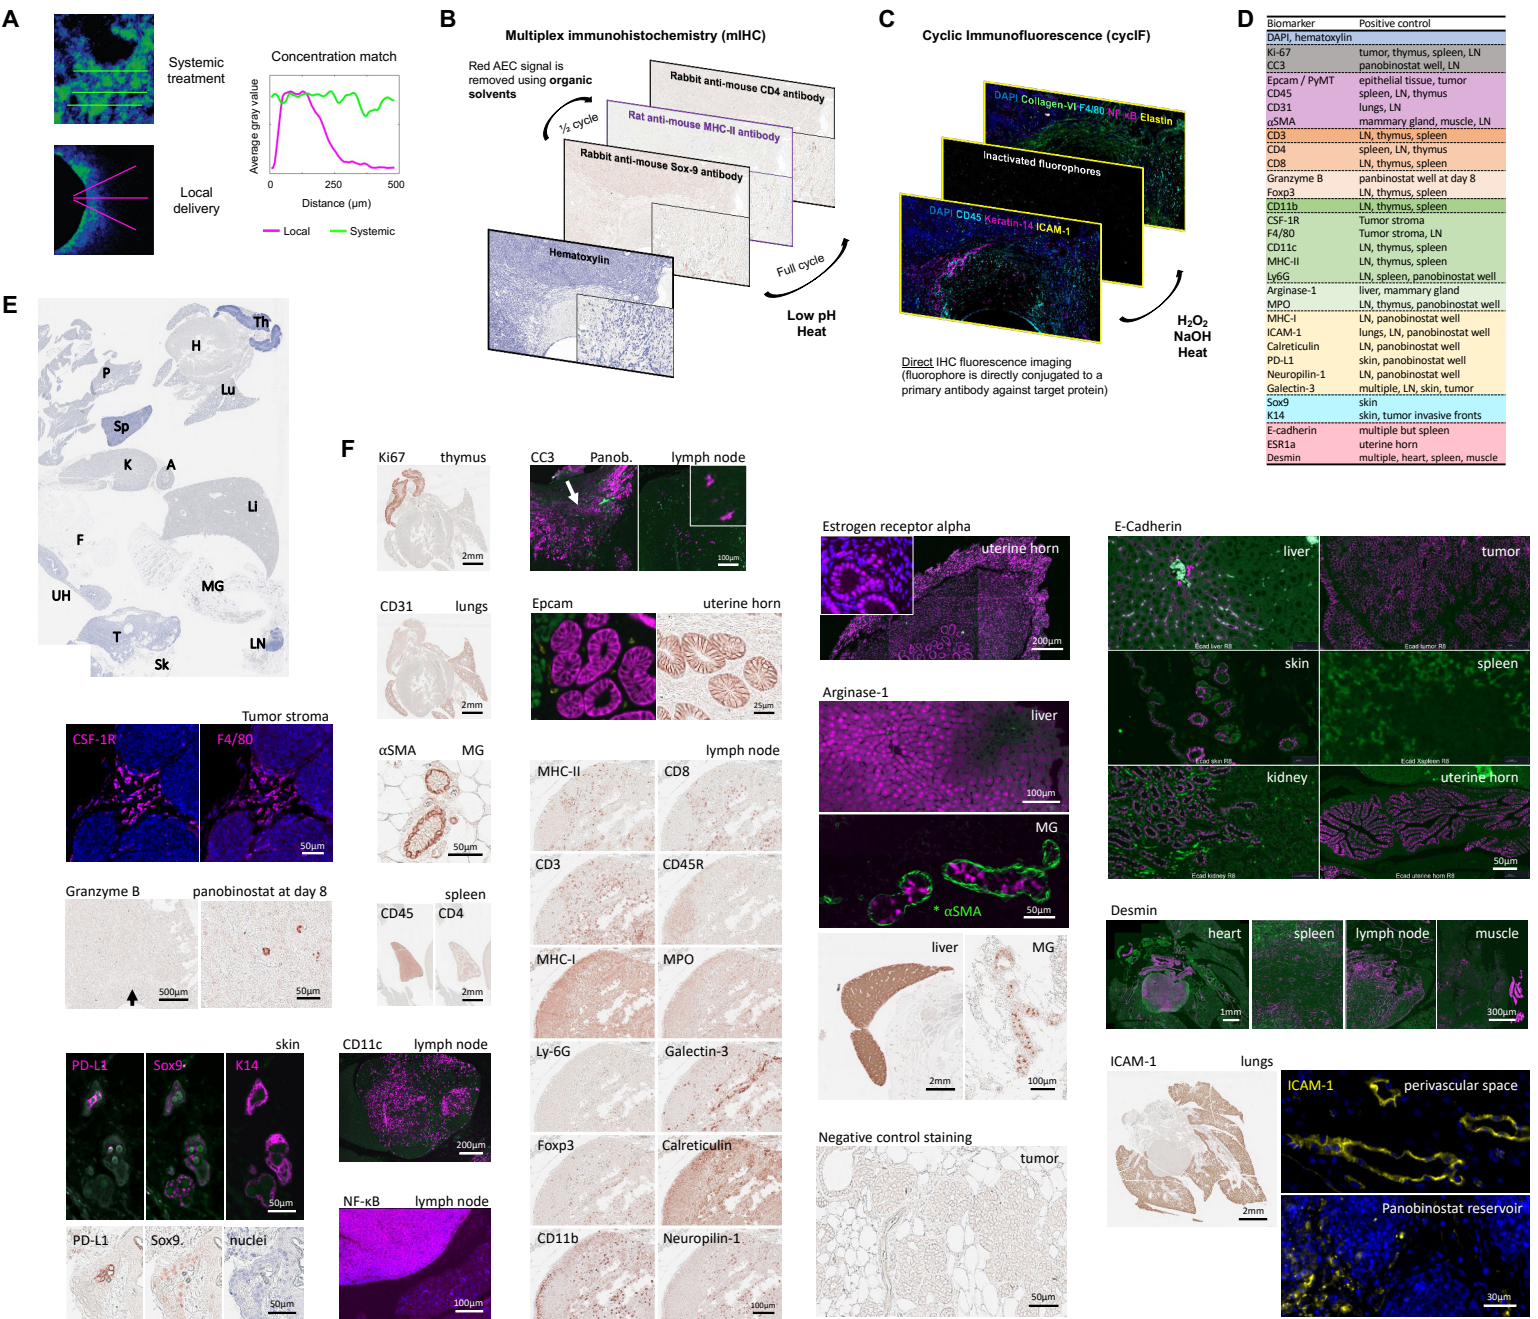



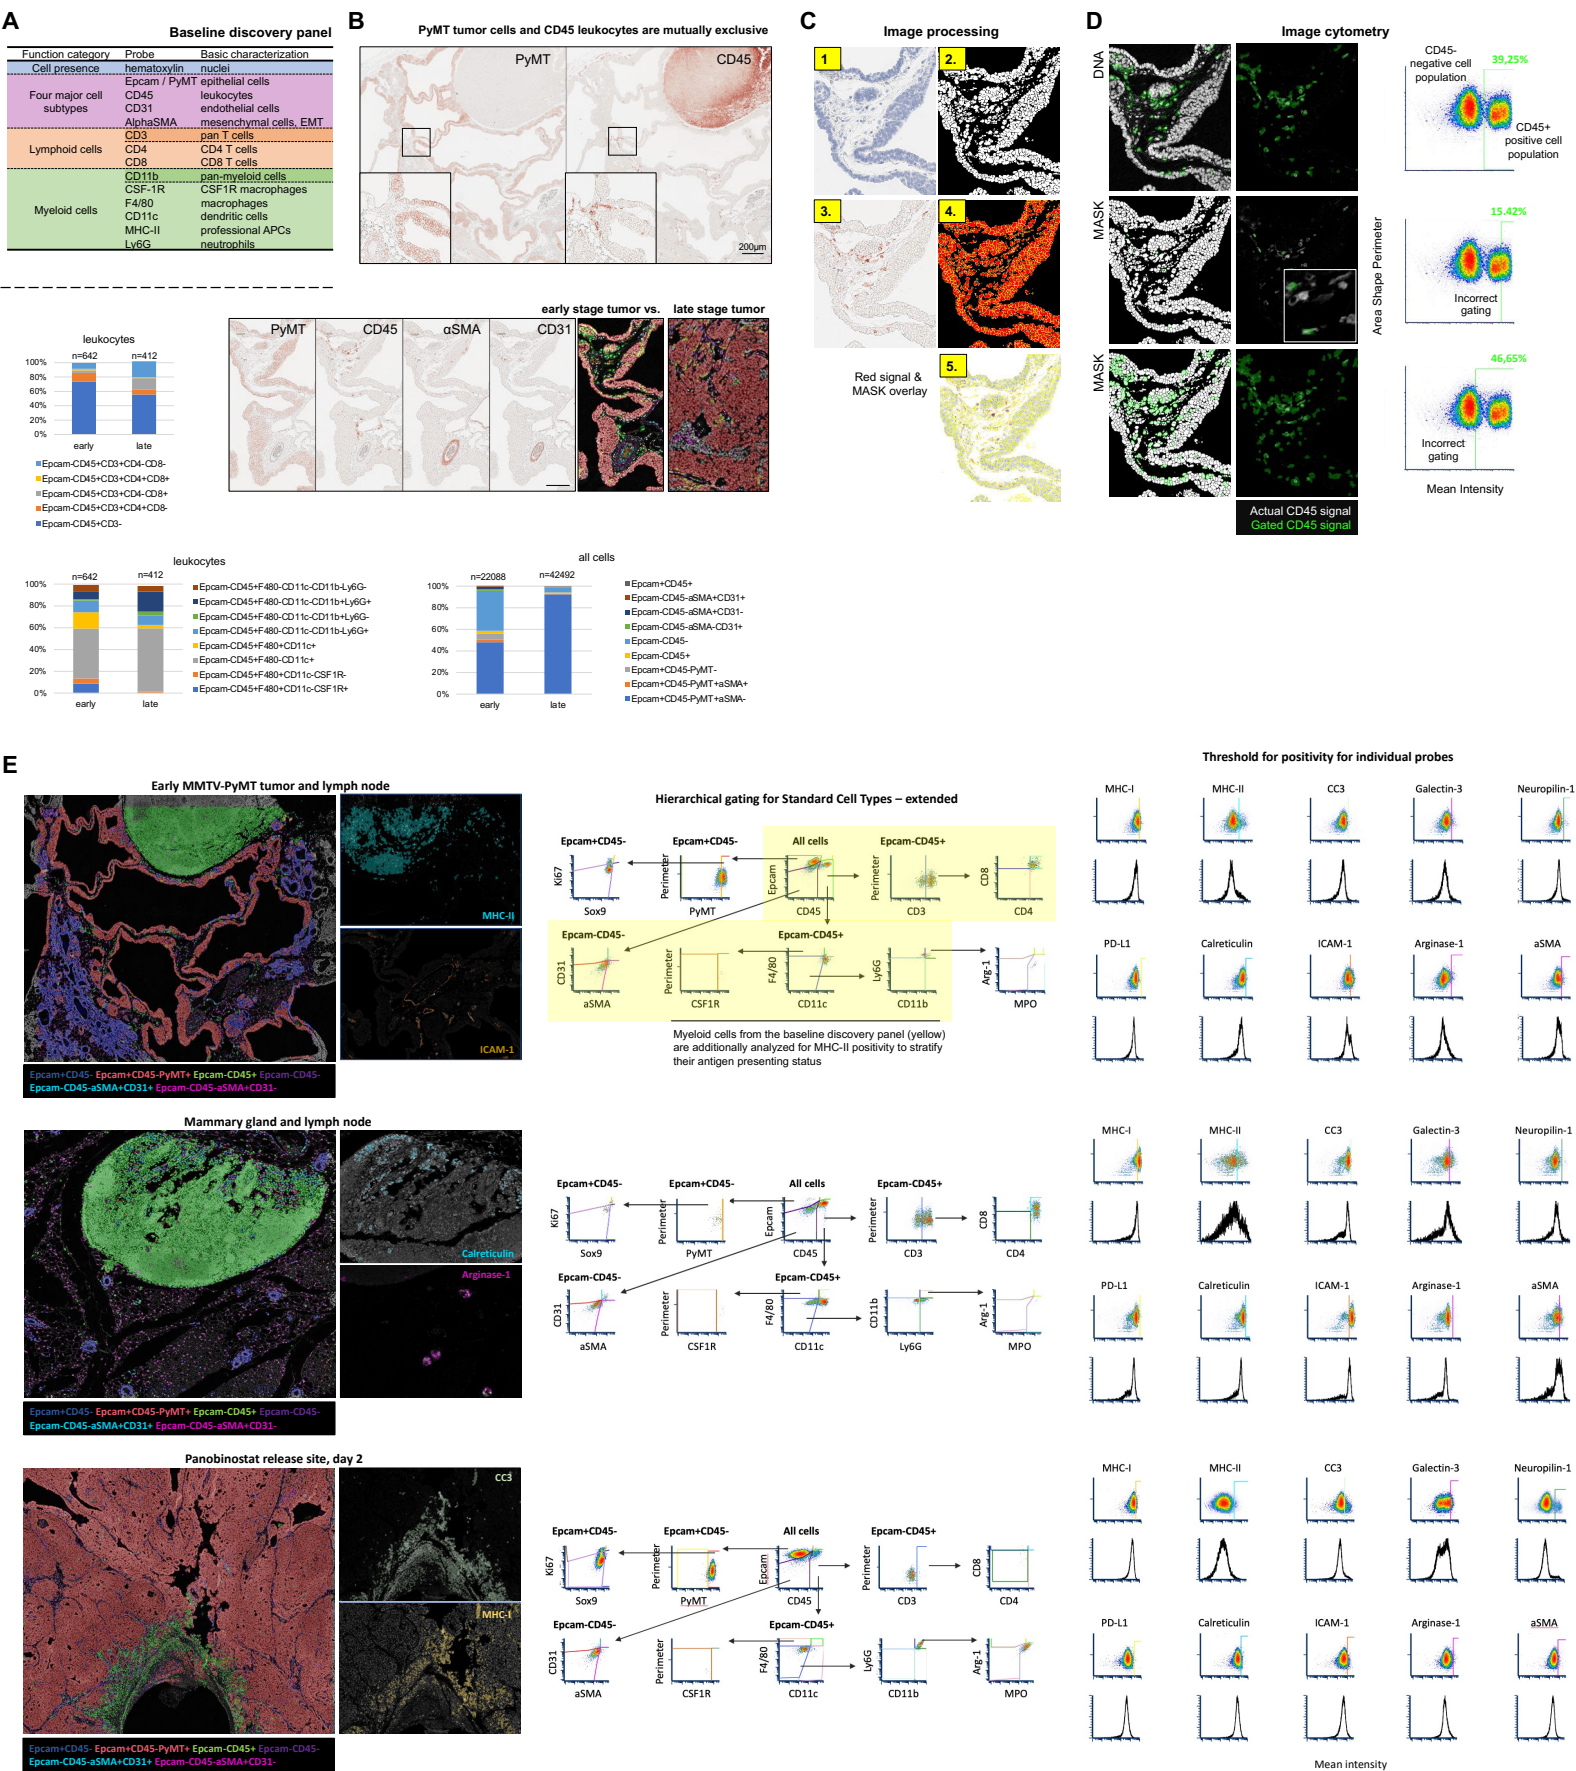













**A**

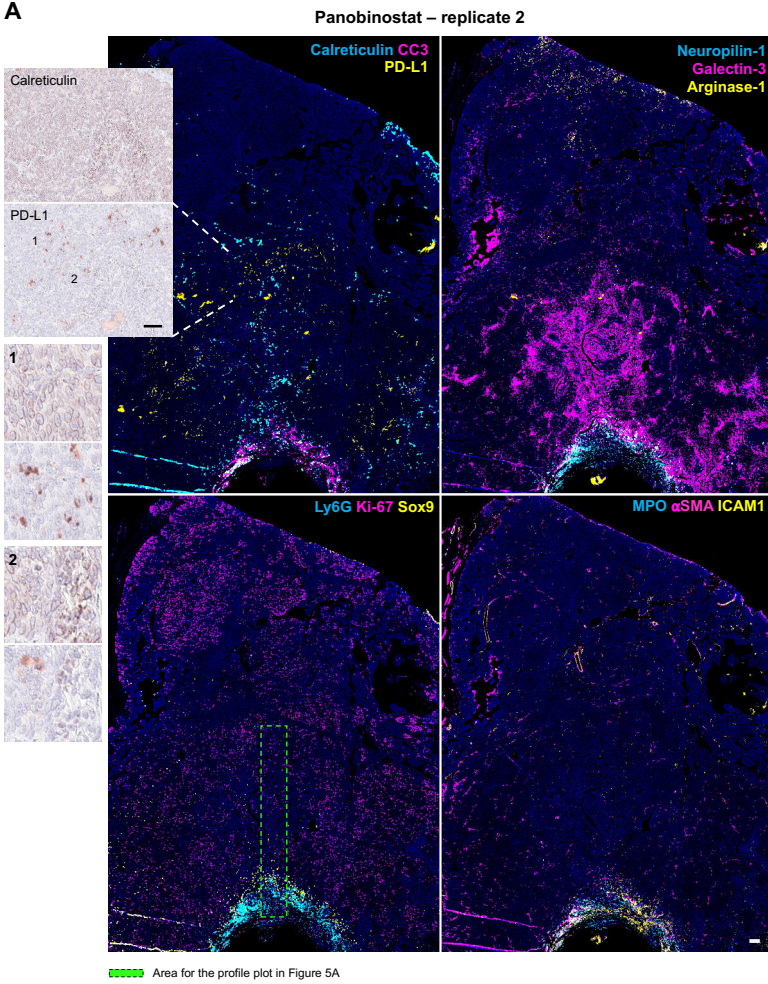

**F**

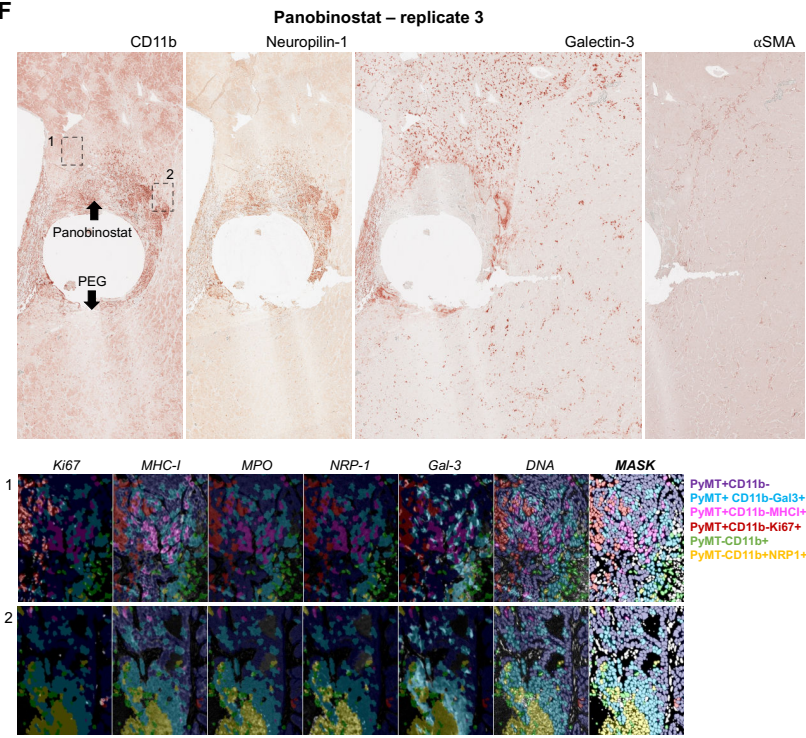

**G**

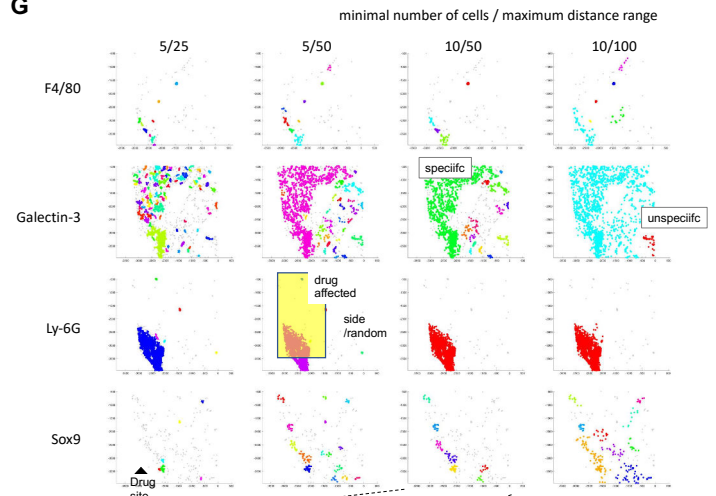

**B**

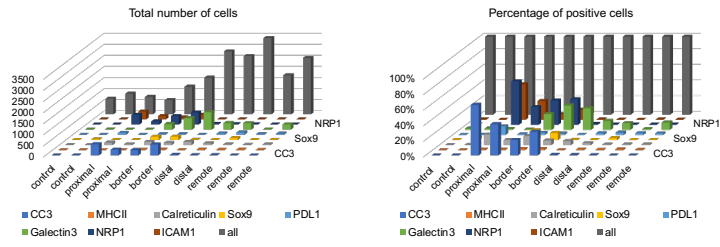

**C**

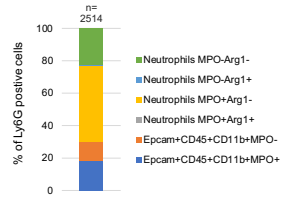

**D**

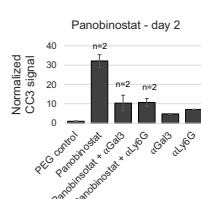

**E**

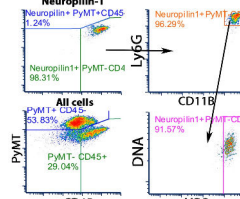

**H**

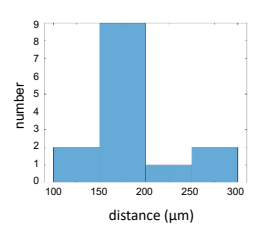



**A**

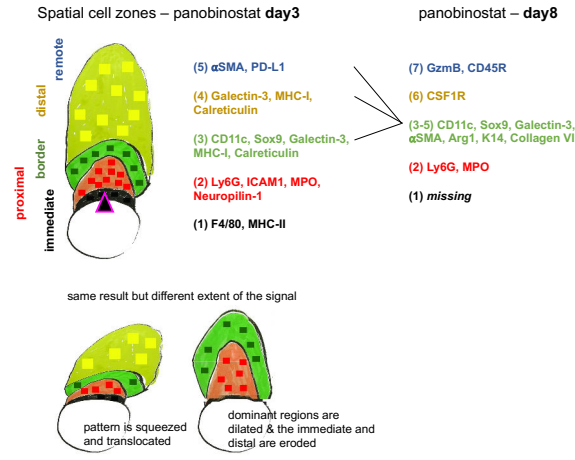

**B**

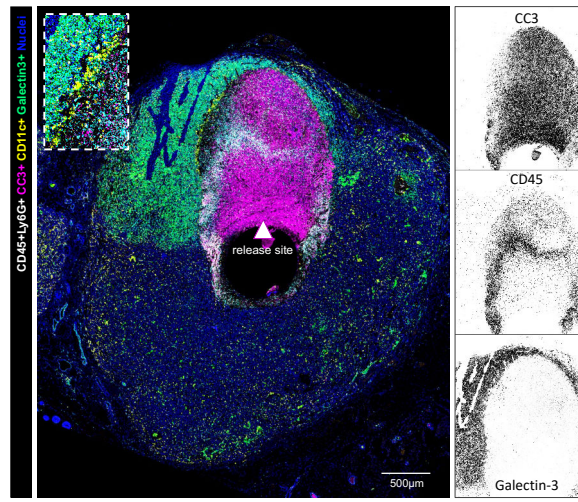

**C**

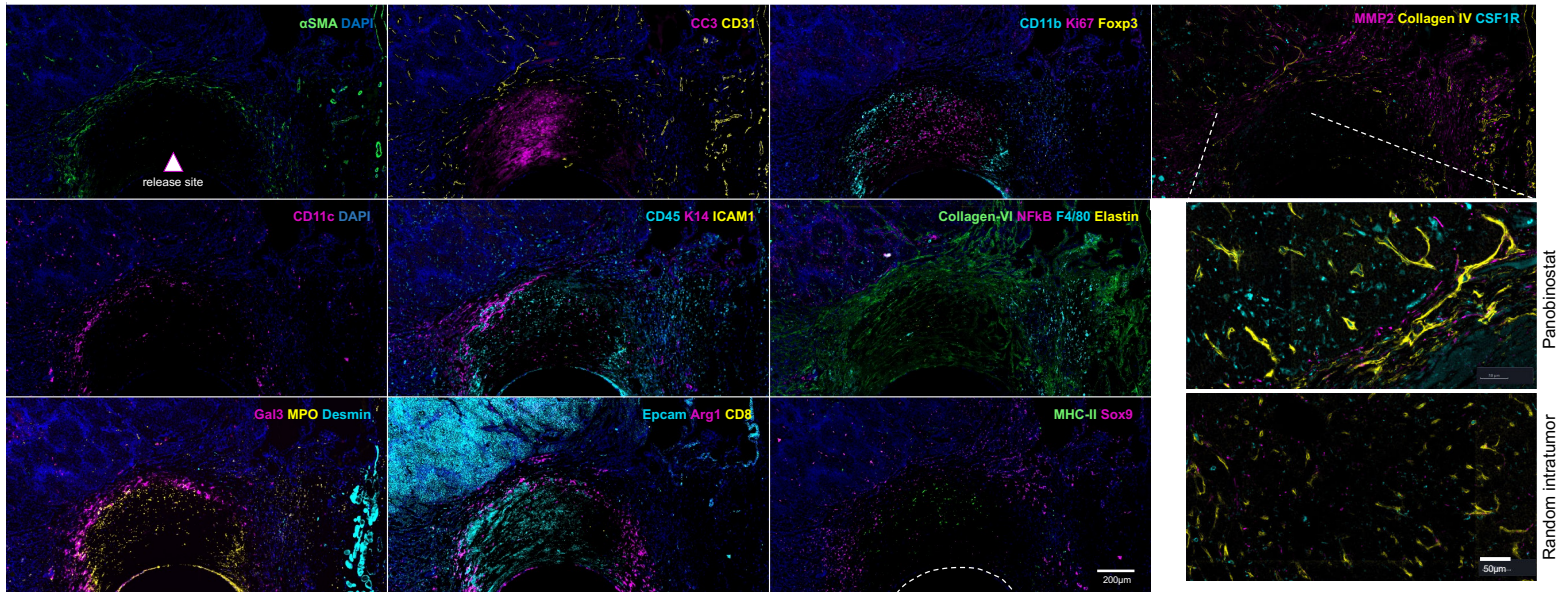

**D**

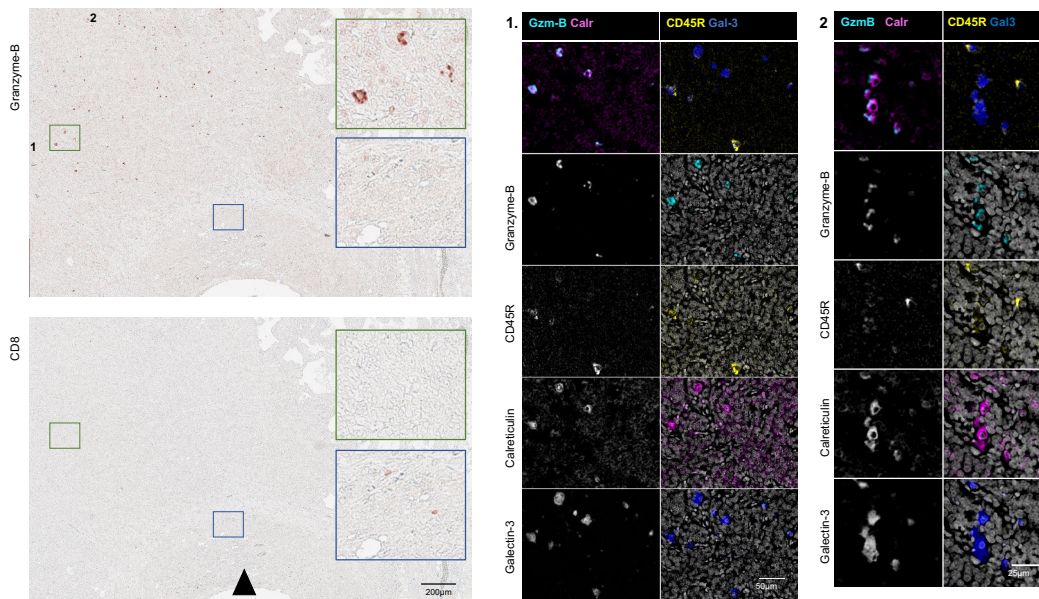

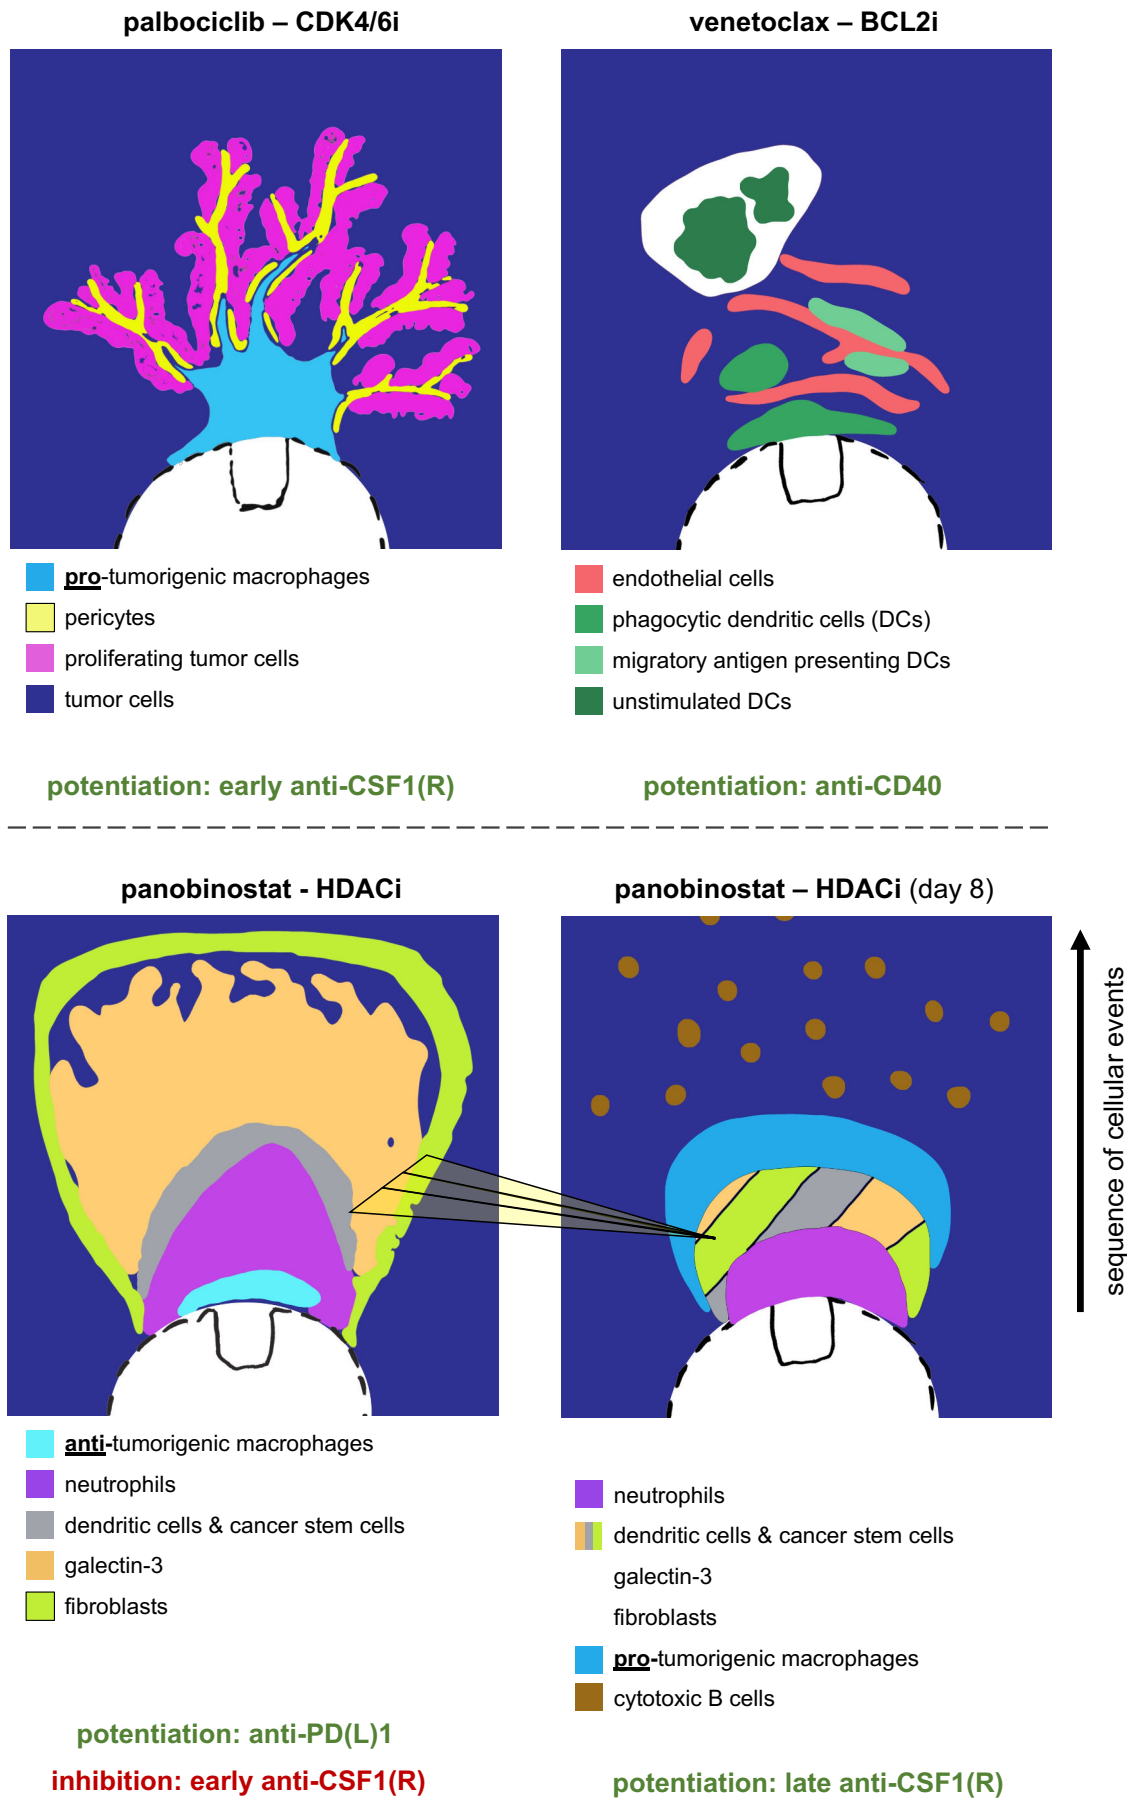



A

venetoclax panobinostat intersection day 8 – replicate 2

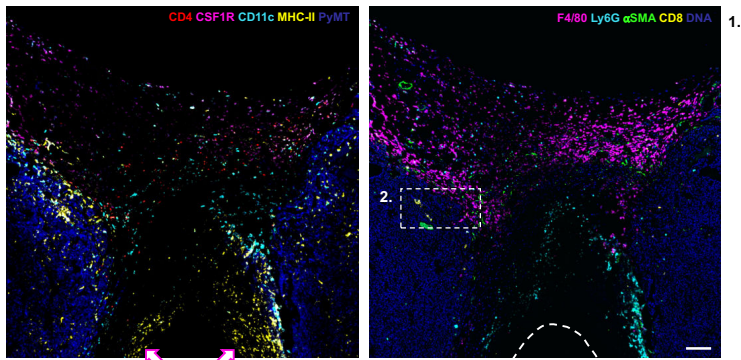

Veneto Pano

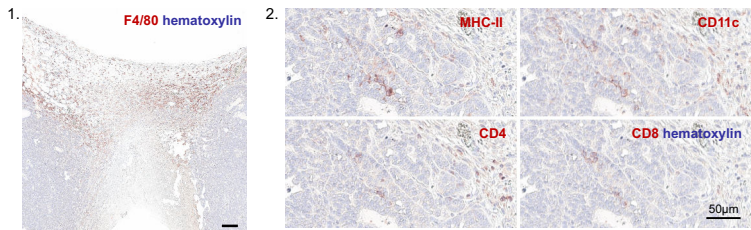

Cleared tumor tissue without nuclei staining

C

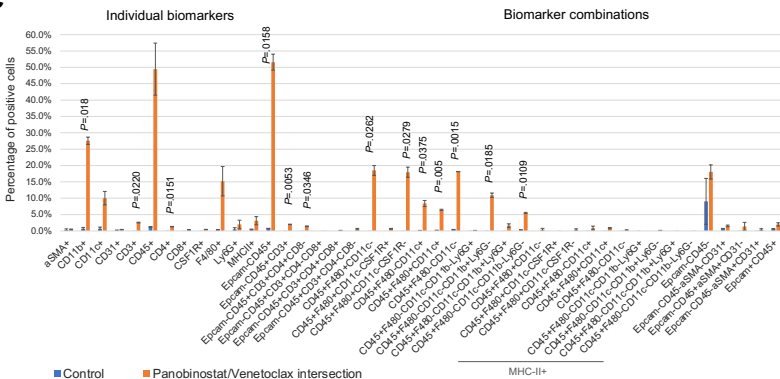

B

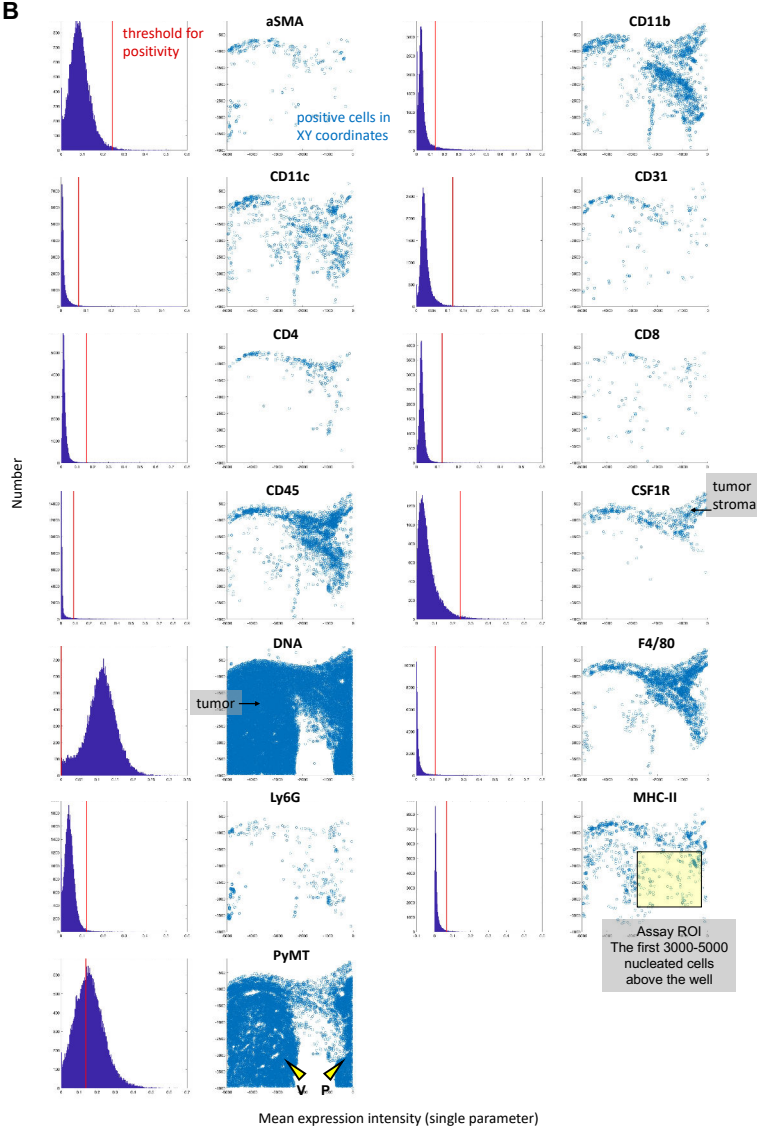

Source: https://www.biorxiv.org/content/biorxiv/early/2021/09/02/2021.09.01.458631.full.pdf
